# Supplementary material
Source: publisher figshare collection journal article supplement (https://springernature.figshare.com/ndownloader/files/31271269)
Supplement: Supplementary file 1 [file 31271269]

## Sheet: Product Level Data
*PCF-ID	Year of reporting	*Stage-level CO2e available	Product name (and functional unit)	Product detail	Company	Country (where company is incorporated)	Company's GICS Industry Group	Company's GICS Industry	*Company's sector	Product weight (kg)	*Source for product weight	Product's carbon footprint (PCF, kg CO2e)	*Carbon intensity	Protocol used for PCF	Relative change in PCF vs previous	Company-reported reason for change	*Change reason category	*%Upstream estimated from %Operations	*Upstream CO2e (fraction of total PCF)	*Operations CO2e (fraction of total PCF)	*Downstream CO2e (fraction of total PCF)	*Transport CO2e (fraction of total PCF)	*EndOfLife CO2e (fraction of total PCF)	*Adjustments to raw data (if any)
10056-1-2014	2014	Yes	Frosted Flakes(R) Cereal	Frosted Flakes(R), 23 oz., Produced in Lancaster, PA (One Carton)	Kellogg Company	USA	Food, Beverage & Tobacco	Food Products	Food & Beverage	0.7485	Estimated from external data based on product description	2	2.67	Not reported	(not reported by company)	N/a	N/a (no %change reported)	No	0.575	0.3	0.125	0.045	(included in downstream but not reported separately)	Divided stage and total emissions by 1000 (based on expected carbon intensity)
10056-1-2015	2015	Yes	Frosted Flakes, 23 oz, produced in Lancaster, PA (one carton)	Cereal	Kellogg Company	USA	Food & Beverage Processing	Not used for 2015 reporting	Food & Beverage	0.7485	Estimated from external data based on product description	2	2.67	Not reported	(not reported by company)	N/a	N/a (no %change reported)	No	0.575	0.3	0.125	0.045	(included in downstream but not reported separately)	Divided stage and total emissions by 1000 (based on expected carbon intensity)
10222-1-2013	2013	Yes	Office Chair	Field not included in 2013 data	KNOLL INC	USA	Capital Goods	Building Products	Comm. equipm. & capital goods	20.68	Estimated from external data based on product description	72.54	3.51	Not reported	(not reported by company)	N/a	N/a (no previous data available)	Yes	0.8063	0.1736	0.0201	(included in up/downstream but not reported separately)	0	Changed %change to zero, according to field "change reason"
10261-1-2017	2017	Yes	Multifunction Printers	bizhub C458	Konica Minolta, Inc.	Japan	Technology Hardware & Equipment	Electronic Equipment, Instruments & Components	Computer, IT & telecom	110	Estimated from external data based on product description	1488	13.53	ISO	(not reported by company)	N/a	N/a (no previous data available)	No	0.3065	0.0551	0.6384	0.0101	0.0276	None
10261-2-2017	2017	Yes	Multifunction Printers	bizhub C558	Konica Minolta, Inc.	Japan	Technology Hardware & Equipment	Electronic Equipment, Instruments & Components	Computer, IT & telecom	110	Estimated from external data based on product description	1818	16.53	ISO	(not reported by company)	N/a	N/a (no previous data available)	No	0.2508	0.0451	0.7041	0.0083	0.0226	None
10261-3-2017	2017	Yes	Multifunction Printers	bizhub C658	Konica Minolta, Inc.	Japan	Technology Hardware & Equipment	Electronic Equipment, Instruments & Components	Computer, IT & telecom	110	Estimated from external data based on product description	2274	20.67	ISO	(not reported by company)	N/a	N/a (no previous data available)	No	0.2005	0.0361	0.7634	0.0066	0.018	None
10324-1-2016	2016	No	KURALON fiber	Raw material for tire reinforcing materials	Kuraray Co., Ltd.	Japan	Materials	Chemicals	Chemicals	1500	As per company's submission to CDP	10000	6.67	Not reported	(not reported by company)	N/a	N/a (no %change reported)	N/a (product with insufficient stage-level data)	N/a (product with insufficient stage-level data)	N/a (product with insufficient stage-level data)	N/a (product with insufficient stage-level data)	N/a (product with insufficient stage-level data)	N/a (product with insufficient stage-level data)	None
10418-1-2013	2013	No	Portland Cement	Field not included in 2013 data	Lafarge S.A.	France	Materials	Construction Materials	Construction & commercial materials	1000	As per company's submission to CDP	1102	1.1	Not reported	(not reported by company)	N/a	N/a (no %change reported)	N/a (product with insufficient stage-level data)	N/a (product with insufficient stage-level data)	N/a (product with insufficient stage-level data)	N/a (product with insufficient stage-level data)	N/a (product with insufficient stage-level data)	N/a (product with insufficient stage-level data)	None
10661-10-2014	2014	No	Regular Straight 505® Jeans – Steel (Water<Less™)	BLANK	Levi Strauss & Co.	USA	Consumer Durables & Apparel	Textiles, Apparel & Luxury Goods	Home durables, textiles, & equipment	0.7665	Estimated from external data based on product description	15	19.57	Not reported	(not reported by company)	N/a	N/a (no %change reported)	N/a (product with insufficient stage-level data)	N/a (product with insufficient stage-level data)	N/a (product with insufficient stage-level data)	N/a (product with insufficient stage-level data)	N/a (product with insufficient stage-level data)	N/a (product with insufficient stage-level data)	None
10661-10-2015	2015	No	Regular Straight 505® Jeans – Steel (Water<Less™)	BLANK	Levi Strauss & Co.	USA	Textiles, Apparel, Footwear and Luxury Goods	Not used for 2015 reporting	Home durables, textiles, & equipment	0.7665	Estimated from external data based on product description	15	19.57	Not reported	(not reported by company)	N/a	N/a (no %change reported)	N/a (product with insufficient stage-level data)	N/a (product with insufficient stage-level data)	N/a (product with insufficient stage-level data)	N/a (product with insufficient stage-level data)	N/a (product with insufficient stage-level data)	N/a (product with insufficient stage-level data)	None
10661-10-2016	2016	No	Regular Straight 505® Jeans – Steel (Water<Less™)		Levi Strauss & Co.	USA	Consumer Durables & Apparel	Textiles, Apparel & Luxury Goods	Home durables, textiles, & equipment	0.7665	Estimated from external data based on product description	15	19.57	Not reported	(not reported by company)	N/a	N/a (no %change reported)	N/a (product with insufficient stage-level data)	N/a (product with insufficient stage-level data)	N/a (product with insufficient stage-level data)	N/a (product with insufficient stage-level data)	N/a (product with insufficient stage-level data)	N/a (product with insufficient stage-level data)	None
10661-11-2014	2014	No	501® Original Jeans – Rinse Run	BLANK	Levi Strauss & Co.	USA	Consumer Durables & Apparel	Textiles, Apparel & Luxury Goods	Home durables, textiles, & equipment	0.997	Estimated from external data based on product description	15	15.05	Not reported	(not reported by company)	N/a	N/a (no %change reported)	N/a (product with insufficient stage-level data)	N/a (product with insufficient stage-level data)	N/a (product with insufficient stage-level data)	N/a (product with insufficient stage-level data)	N/a (product with insufficient stage-level data)	N/a (product with insufficient stage-level data)	None
10661-11-2015	2015	No	501® Original Jeans – Rinse Run	BLANK	Levi Strauss & Co.	USA	Textiles, Apparel, Footwear and Luxury Goods	Not used for 2015 reporting	Home durables, textiles, & equipment	0.997	Estimated from external data based on product description	16	16.05	Not reported	(not reported by company)	N/a	N/a (no %change reported)	N/a (product with insufficient stage-level data)	N/a (product with insufficient stage-level data)	N/a (product with insufficient stage-level data)	N/a (product with insufficient stage-level data)	N/a (product with insufficient stage-level data)	N/a (product with insufficient stage-level data)	None
10661-1-2014	2014	No	501® Original Jeans – Dark Stonewash	BLANK	Levi Strauss & Co.	USA	Consumer Durables & Apparel	Textiles, Apparel & Luxury Goods	Home durables, textiles, & equipment	0.997	Estimated from external data based on product description	16	16.05	PAS2050	(not reported by company)	N/a	N/a (no %change reported)	N/a (product with insufficient stage-level data)	N/a (product with insufficient stage-level data)	N/a (product with insufficient stage-level data)	N/a (product with insufficient stage-level data)	N/a (product with insufficient stage-level data)	N/a (product with insufficient stage-level data)	None
10661-1-2015	2015	No	501® Original Jeans – Dark Stonewash	BLANK	Levi Strauss & Co.	USA	Textiles, Apparel, Footwear and Luxury Goods	Not used for 2015 reporting	Home durables, textiles, & equipment	0.997	Estimated from external data based on product description	16	16.05	PAS2050	(not reported by company)	N/a	N/a (no %change reported)	N/a (product with insufficient stage-level data)	N/a (product with insufficient stage-level data)	N/a (product with insufficient stage-level data)	N/a (product with insufficient stage-level data)	N/a (product with insufficient stage-level data)	N/a (product with insufficient stage-level data)	None
10661-1-2016	2016	No	501® Original Jeans – Dark Stonewash		Levi Strauss & Co.	USA	Consumer Durables & Apparel	Textiles, Apparel & Luxury Goods	Home durables, textiles, & equipment	0.997	Estimated from external data based on product description	16	16.05	PAS2050	(not reported by company)	N/a	N/a (no %change reported)	N/a (product with insufficient stage-level data)	N/a (product with insufficient stage-level data)	N/a (product with insufficient stage-level data)	N/a (product with insufficient stage-level data)	N/a (product with insufficient stage-level data)	N/a (product with insufficient stage-level data)	None
10661-2-2014	2014	No	Slim Straight 514™ Jeans – Indigo Wash	BLANK	Levi Strauss & Co.	USA	Consumer Durables & Apparel	Textiles, Apparel & Luxury Goods	Home durables, textiles, & equipment	0.68	Estimated from external data based on product description	8.6	12.65	PAS2050	(not reported by company)	N/a	N/a (no %change reported)	N/a (product with insufficient stage-level data)	N/a (product with insufficient stage-level data)	N/a (product with insufficient stage-level data)	N/a (product with insufficient stage-level data)	N/a (product with insufficient stage-level data)	N/a (product with insufficient stage-level data)	None
10661-2-2015	2015	No	Slim Straight 514™ Jeans – Indigo Wash	BLANK	Levi Strauss & Co.	USA	Textiles, Apparel, Footwear and Luxury Goods	Not used for 2015 reporting	Home durables, textiles, & equipment	0.68	Estimated from external data based on product description	8.6	12.65	Not reported	(not reported by company)	N/a	N/a (no %change reported)	N/a (product with insufficient stage-level data)	N/a (product with insufficient stage-level data)	N/a (product with insufficient stage-level data)	N/a (product with insufficient stage-level data)	N/a (product with insufficient stage-level data)	N/a (product with insufficient stage-level data)	None
10661-2-2016	2016	No	Slim Straight 514™ Jeans – Indigo Wash		Levi Strauss & Co.	USA	Consumer Durables & Apparel	Textiles, Apparel & Luxury Goods	Home durables, textiles, & equipment	0.88	Estimated from external data based on product description	8.6	9.77	Not reported	(not reported by company)	N/a	N/a (no %change reported)	N/a (product with insufficient stage-level data)	N/a (product with insufficient stage-level data)	N/a (product with insufficient stage-level data)	N/a (product with insufficient stage-level data)	N/a (product with insufficient stage-level data)	N/a (product with insufficient stage-level data)	None
10661-3-2014	2014	No	Slim Straight 514™ Jeans – Rigid Tank	BLANK	Levi Strauss & Co.	USA	Consumer Durables & Apparel	Textiles, Apparel & Luxury Goods	Home durables, textiles, & equipment	0.68	Estimated from external data based on product description	7.7	11.32	Not reported	(not reported by company)	N/a	N/a (no %change reported)	N/a (product with insufficient stage-level data)	N/a (product with insufficient stage-level data)	N/a (product with insufficient stage-level data)	N/a (product with insufficient stage-level data)	N/a (product with insufficient stage-level data)	N/a (product with insufficient stage-level data)	None
10661-3-2015	2015	No	Slim Straight 514™ Jeans – Rigid Tank	BLANK	Levi Strauss & Co.	USA	Textiles, Apparel, Footwear and Luxury Goods	Not used for 2015 reporting	Home durables, textiles, & equipment	0.68	Estimated from external data based on product description	7.7	11.32	Not reported	(not reported by company)	N/a	N/a (no %change reported)	N/a (product with insufficient stage-level data)	N/a (product with insufficient stage-level data)	N/a (product with insufficient stage-level data)	N/a (product with insufficient stage-level data)	N/a (product with insufficient stage-level data)	N/a (product with insufficient stage-level data)	None
10661-3-2016	2016	No	Slim Straight 514™ Jeans – Rigid Tank		Levi Strauss & Co.	USA	Consumer Durables & Apparel	Textiles, Apparel & Luxury Goods	Home durables, textiles, & equipment	0.88	Estimated from external data based on product description	7.7	8.75	Not reported	(not reported by company)	N/a	N/a (no %change reported)	N/a (product with insufficient stage-level data)	N/a (product with insufficient stage-level data)	N/a (product with insufficient stage-level data)	N/a (product with insufficient stage-level data)	N/a (product with insufficient stage-level data)	N/a (product with insufficient stage-level data)	None
10661-4-2014	2014	No	501® Original Jeans – Light Stonewash	BLANK	Levi Strauss & Co.	USA	Consumer Durables & Apparel	Textiles, Apparel & Luxury Goods	Home durables, textiles, & equipment	0.997	Estimated from external data based on product description	15	15.05	Not reported	(not reported by company)	N/a	N/a (no %change reported)	N/a (product with insufficient stage-level data)	N/a (product with insufficient stage-level data)	N/a (product with insufficient stage-level data)	N/a (product with insufficient stage-level data)	N/a (product with insufficient stage-level data)	N/a (product with insufficient stage-level data)	None
10661-4-2015	2015	No	501® Original Jeans – Light Stonewash	BLANK	Levi Strauss & Co.	USA	Textiles, Apparel, Footwear and Luxury Goods	Not used for 2015 reporting	Home durables, textiles, & equipment	0.997	Estimated from external data based on product description	15	15.05	Not reported	(not reported by company)	N/a	N/a (no %change reported)	N/a (product with insufficient stage-level data)	N/a (product with insufficient stage-level data)	N/a (product with insufficient stage-level data)	N/a (product with insufficient stage-level data)	N/a (product with insufficient stage-level data)	N/a (product with insufficient stage-level data)	None
10661-5-2014	2014	No	501® Original Jeans – Medium Stonewash	BLANK	Levi Strauss & Co.	USA	Consumer Durables & Apparel	Textiles, Apparel & Luxury Goods	Home durables, textiles, & equipment	0.997	Estimated from external data based on product description	16	16.05	Not reported	(not reported by company)	N/a	N/a (no %change reported)	N/a (product with insufficient stage-level data)	N/a (product with insufficient stage-level data)	N/a (product with insufficient stage-level data)	N/a (product with insufficient stage-level data)	N/a (product with insufficient stage-level data)	N/a (product with insufficient stage-level data)	None
10661-5-2015	2015	No	501® Original Jeans – Medium Stonewash	BLANK	Levi Strauss & Co.	USA	Textiles, Apparel, Footwear and Luxury Goods	Not used for 2015 reporting	Home durables, textiles, & equipment	0.997	Estimated from external data based on product description	16	16.05	Not reported	(not reported by company)	N/a	N/a (no %change reported)	N/a (product with insufficient stage-level data)	N/a (product with insufficient stage-level data)	N/a (product with insufficient stage-level data)	N/a (product with insufficient stage-level data)	N/a (product with insufficient stage-level data)	N/a (product with insufficient stage-level data)	None
10661-6-2014	2014	No	Slim Straight 514™ Jeans – Tumbled Rigid	BLANK	Levi Strauss & Co.	USA	Consumer Durables & Apparel	Textiles, Apparel & Luxury Goods	Home durables, textiles, & equipment	0.68	Estimated from external data based on product description	16	23.53	Not reported	(not reported by company)	N/a	N/a (no %change reported)	N/a (product with insufficient stage-level data)	N/a (product with insufficient stage-level data)	N/a (product with insufficient stage-level data)	N/a (product with insufficient stage-level data)	N/a (product with insufficient stage-level data)	N/a (product with insufficient stage-level data)	None
10661-6-2015	2015	No	Slim Straight 514™ Jeans – Tumbled Rigid	BLANK	Levi Strauss & Co.	USA	Textiles, Apparel, Footwear and Luxury Goods	Not used for 2015 reporting	Home durables, textiles, & equipment	0.68	Estimated from external data based on product description	16	23.53	Not reported	(not reported by company)	N/a	N/a (no %change reported)	N/a (product with insufficient stage-level data)	N/a (product with insufficient stage-level data)	N/a (product with insufficient stage-level data)	N/a (product with insufficient stage-level data)	N/a (product with insufficient stage-level data)	N/a (product with insufficient stage-level data)	None
10661-7-2014	2014	No	Regular Straight 505® Jeans – Range (Water<Less™)	BLANK	Levi Strauss & Co.	USA	Consumer Durables & Apparel	Textiles, Apparel & Luxury Goods	Home durables, textiles, & equipment	0.7665	Estimated from external data based on product description	16	20.87	Not reported	(not reported by company)	N/a	N/a (no %change reported)	N/a (product with insufficient stage-level data)	N/a (product with insufficient stage-level data)	N/a (product with insufficient stage-level data)	N/a (product with insufficient stage-level data)	N/a (product with insufficient stage-level data)	N/a (product with insufficient stage-level data)	None
10661-7-2015	2015	No	Regular Straight 505® Jeans – Range (Water<Less™)	BLANK	Levi Strauss & Co.	USA	Textiles, Apparel, Footwear and Luxury Goods	Not used for 2015 reporting	Home durables, textiles, & equipment	0.7665	Estimated from external data based on product description	16	20.87	Not reported	(not reported by company)	N/a	N/a (no %change reported)	N/a (product with insufficient stage-level data)	N/a (product with insufficient stage-level data)	N/a (product with insufficient stage-level data)	N/a (product with insufficient stage-level data)	N/a (product with insufficient stage-level data)	N/a (product with insufficient stage-level data)	None
10661-8-2014	2014	No	Regular Straight 505® Jeans – Range	BLANK	Levi Strauss & Co.	USA	Consumer Durables & Apparel	Textiles, Apparel & Luxury Goods	Home durables, textiles, & equipment	0.7665	Estimated from external data based on product description	16	20.87	Not reported	(not reported by company)	N/a	N/a (no %change reported)	N/a (product with insufficient stage-level data)	N/a (product with insufficient stage-level data)	N/a (product with insufficient stage-level data)	N/a (product with insufficient stage-level data)	N/a (product with insufficient stage-level data)	N/a (product with insufficient stage-level data)	None
10661-8-2015	2015	No	Regular Straight 505® Jeans – Range	BLANK	Levi Strauss & Co.	USA	Textiles, Apparel, Footwear and Luxury Goods	Not used for 2015 reporting	Home durables, textiles, & equipment	0.7665	Estimated from external data based on product description	16	20.87	Not reported	(not reported by company)	N/a	N/a (no %change reported)	N/a (product with insufficient stage-level data)	N/a (product with insufficient stage-level data)	N/a (product with insufficient stage-level data)	N/a (product with insufficient stage-level data)	N/a (product with insufficient stage-level data)	N/a (product with insufficient stage-level data)	None
10661-9-2014	2014	No	Regular Straight 505® Jeans – House Cat	BLANK	Levi Strauss & Co.	USA	Consumer Durables & Apparel	Textiles, Apparel & Luxury Goods	Home durables, textiles, & equipment	0.7665	Estimated from external data based on product description	15	19.57	Not reported	(not reported by company)	N/a	N/a (no %change reported)	N/a (product with insufficient stage-level data)	N/a (product with insufficient stage-level data)	N/a (product with insufficient stage-level data)	N/a (product with insufficient stage-level data)	N/a (product with insufficient stage-level data)	N/a (product with insufficient stage-level data)	None
10661-9-2015	2015	No	Regular Straight 505® Jeans – House Cat	BLANK	Levi Strauss & Co.	USA	Textiles, Apparel, Footwear and Luxury Goods	Not used for 2015 reporting	Home durables, textiles, & equipment	0.7665	Estimated from external data based on product description	16	20.87	Not reported	(not reported by company)	N/a	N/a (no %change reported)	N/a (product with insufficient stage-level data)	N/a (product with insufficient stage-level data)	N/a (product with insufficient stage-level data)	N/a (product with insufficient stage-level data)	N/a (product with insufficient stage-level data)	N/a (product with insufficient stage-level data)	None
10666-10-2014	2014	No	MS315DN - Mono Laser Printer	Mono Laser Printer	Lexmark International, Inc.	USA	Technology Hardware & Equipment	Computers & Peripherals	Computer, IT & telecom	16.0345	Estimated from external data based on product description	1616.17	100.79	ISO	(not reported by company)	N/a	N/a (no %change reported)	N/a (product with insufficient stage-level data)	N/a (product with insufficient stage-level data)	N/a (product with insufficient stage-level data)	N/a (product with insufficient stage-level data)	N/a (product with insufficient stage-level data)	N/a (product with insufficient stage-level data)	Concatenated fields product name and product description into field product name to give richer product description
10666-11-2014	2014	No	MS410DN - Mono Laser Printer	Mono Laser Printer	Lexmark International, Inc.	USA	Technology Hardware & Equipment	Computers & Peripherals	Computer, IT & telecom	15.8984	Estimated from external data based on product description	1523.19	95.81	ISO	(not reported by company)	N/a	N/a (no %change reported)	N/a (product with insufficient stage-level data)	N/a (product with insufficient stage-level data)	N/a (product with insufficient stage-level data)	N/a (product with insufficient stage-level data)	N/a (product with insufficient stage-level data)	N/a (product with insufficient stage-level data)	Concatenated fields product name and product description into field product name to give richer product description
10666-1-2014	2014	No	CX310DN - Color Laser Printer	Color Laser Printer	Lexmark International, Inc.	USA	Technology Hardware & Equipment	Computers & Peripherals	Computer, IT & telecom	31.3659	Estimated from external data based on product description	2358.38	75.19	ISO	(not reported by company)	N/a	N/a (no %change reported)	N/a (product with insufficient stage-level data)	N/a (product with insufficient stage-level data)	N/a (product with insufficient stage-level data)	N/a (product with insufficient stage-level data)	N/a (product with insufficient stage-level data)	N/a (product with insufficient stage-level data)	Concatenated fields product name and product description into field product name to give richer product description
10666-12-2014	2014	No	MS415DN - Mono Laser Printer	Mono Laser Printer	Lexmark International, Inc.	USA	Technology Hardware & Equipment	Computers & Peripherals	Computer, IT & telecom	16.0345	Estimated from external data based on product description	1524.56	95.08	ISO	(not reported by company)	N/a	N/a (no %change reported)	N/a (product with insufficient stage-level data)	N/a (product with insufficient stage-level data)	N/a (product with insufficient stage-level data)	N/a (product with insufficient stage-level data)	N/a (product with insufficient stage-level data)	N/a (product with insufficient stage-level data)	Concatenated fields product name and product description into field product name to give richer product description
10666-13-2014	2014	No	MS510DN - Mono Laser Printer	Mono Laser Printer	Lexmark International, Inc.	USA	Technology Hardware & Equipment	Computers & Peripherals	Computer, IT & telecom	16.6695	Estimated from external data based on product description	1617.69	97.04	ISO	(not reported by company)	N/a	N/a (no %change reported)	N/a (product with insufficient stage-level data)	N/a (product with insufficient stage-level data)	N/a (product with insufficient stage-level data)	N/a (product with insufficient stage-level data)	N/a (product with insufficient stage-level data)	N/a (product with insufficient stage-level data)	Concatenated fields product name and product description into field product name to give richer product description
10666-14-2014	2014	No	MS610DE - Mono Laser Printer	Mono Laser Printer	Lexmark International, Inc.	USA	Technology Hardware & Equipment	Computers & Peripherals	Computer, IT & telecom	18.3705	Estimated from external data based on product description	1978.08	107.68	ISO	(not reported by company)	N/a	N/a (no %change reported)	N/a (product with insufficient stage-level data)	N/a (product with insufficient stage-level data)	N/a (product with insufficient stage-level data)	N/a (product with insufficient stage-level data)	N/a (product with insufficient stage-level data)	N/a (product with insufficient stage-level data)	Concatenated fields product name and product description into field product name to give richer product description
10666-15-2014	2014	No	MS610DN - Mono Laser Printer	Mono Laser Printer	Lexmark International, Inc.	USA	Technology Hardware & Equipment	Computers & Peripherals	Computer, IT & telecom	17.5767	Estimated from external data based on product description	1957.73	111.38	ISO	(not reported by company)	N/a	N/a (no %change reported)	N/a (product with insufficient stage-level data)	N/a (product with insufficient stage-level data)	N/a (product with insufficient stage-level data)	N/a (product with insufficient stage-level data)	N/a (product with insufficient stage-level data)	N/a (product with insufficient stage-level data)	Concatenated fields product name and product description into field product name to give richer product description
10666-16-2014	2014	No	MS810DE - Mono Laser Printer	Mono Laser Printer	Lexmark International, Inc.	USA	Technology Hardware & Equipment	Computers & Peripherals	Computer, IT & telecom	27.4877	Estimated from external data based on product description	2106.94	76.65	ISO	(not reported by company)	N/a	N/a (no %change reported)	N/a (product with insufficient stage-level data)	N/a (product with insufficient stage-level data)	N/a (product with insufficient stage-level data)	N/a (product with insufficient stage-level data)	N/a (product with insufficient stage-level data)	N/a (product with insufficient stage-level data)	Concatenated fields product name and product description into field product name to give richer product description
10666-17-2014	2014	No	MS810DN - Mono Laser Printer	Mono Laser Printer	Lexmark International, Inc.	USA	Technology Hardware & Equipment	Computers & Peripherals	Computer, IT & telecom	27.4423	Estimated from external data based on product description	2005.36	73.08	ISO	(not reported by company)	N/a	N/a (no %change reported)	N/a (product with insufficient stage-level data)	N/a (product with insufficient stage-level data)	N/a (product with insufficient stage-level data)	N/a (product with insufficient stage-level data)	N/a (product with insufficient stage-level data)	N/a (product with insufficient stage-level data)	Concatenated fields product name and product description into field product name to give richer product description
10666-18-2014	2014	No	MS811DN - Mono Laser Printer	Mono Laser Printer	Lexmark International, Inc.	USA	Technology Hardware & Equipment	Computers & Peripherals	Computer, IT & telecom	27.4423	Estimated from external data based on product description	2387.57	87	ISO	(not reported by company)	N/a	N/a (no %change reported)	N/a (product with insufficient stage-level data)	N/a (product with insufficient stage-level data)	N/a (product with insufficient stage-level data)	N/a (product with insufficient stage-level data)	N/a (product with insufficient stage-level data)	N/a (product with insufficient stage-level data)	Concatenated fields product name and product description into field product name to give richer product description
10666-19-2014	2014	No	MS812DE - Mono Laser Printer	Mono Laser Printer	Lexmark International, Inc.	USA	Technology Hardware & Equipment	Computers & Peripherals	Computer, IT & telecom	27.7599	Estimated from external data based on product description	2744.39	98.86	ISO	(not reported by company)	N/a	N/a (no %change reported)	N/a (product with insufficient stage-level data)	N/a (product with insufficient stage-level data)	N/a (product with insufficient stage-level data)	N/a (product with insufficient stage-level data)	N/a (product with insufficient stage-level data)	N/a (product with insufficient stage-level data)	Concatenated fields product name and product description into field product name to give richer product description
10666-20-2014	2014	No	MS812DN - Mono Laser Printer	Mono Laser Printer	Lexmark International, Inc.	USA	Technology Hardware & Equipment	Computers & Peripherals	Computer, IT & telecom	27.4423	Estimated from external data based on product description	2747.47	100.12	ISO	(not reported by company)	N/a	N/a (no %change reported)	N/a (product with insufficient stage-level data)	N/a (product with insufficient stage-level data)	N/a (product with insufficient stage-level data)	N/a (product with insufficient stage-level data)	N/a (product with insufficient stage-level data)	N/a (product with insufficient stage-level data)	Concatenated fields product name and product description into field product name to give richer product description
10666-21-2014	2014	No	MX310DN - Mono Laser Printer	Mono Laser Printer	Lexmark International, Inc.	USA	Technology Hardware & Equipment	Computers & Peripherals	Computer, IT & telecom	22.4528	Estimated from external data based on product description	1140.41	50.79	ISO	(not reported by company)	N/a	N/a (no %change reported)	N/a (product with insufficient stage-level data)	N/a (product with insufficient stage-level data)	N/a (product with insufficient stage-level data)	N/a (product with insufficient stage-level data)	N/a (product with insufficient stage-level data)	N/a (product with insufficient stage-level data)	Concatenated fields product name and product description into field product name to give richer product description
10666-2-2014	2014	No	CX410DE - Color Laser Printer	Color Laser Printer	Lexmark International, Inc.	USA	Technology Hardware & Equipment	Computers & Peripherals	Computer, IT & telecom	31.3659	Estimated from external data based on product description	3236.35	103.18	ISO	(not reported by company)	N/a	N/a (no %change reported)	N/a (product with insufficient stage-level data)	N/a (product with insufficient stage-level data)	N/a (product with insufficient stage-level data)	N/a (product with insufficient stage-level data)	N/a (product with insufficient stage-level data)	N/a (product with insufficient stage-level data)	Concatenated fields product name and product description into field product name to give richer product description
10666-22-2014	2014	No	MX410DE - Mono Laser Printer	Mono Laser Printer	Lexmark International, Inc.	USA	Technology Hardware & Equipment	Computers & Peripherals	Computer, IT & telecom	23.0198	Estimated from external data based on product description	1498.6	65.1	ISO	(not reported by company)	N/a	N/a (no %change reported)	N/a (product with insufficient stage-level data)	N/a (product with insufficient stage-level data)	N/a (product with insufficient stage-level data)	N/a (product with insufficient stage-level data)	N/a (product with insufficient stage-level data)	N/a (product with insufficient stage-level data)	Concatenated fields product name and product description into field product name to give richer product description
10666-23-2014	2014	No	MX511DE - Mono Laser Printer	Mono Laser Printer	Lexmark International, Inc.	USA	Technology Hardware & Equipment	Computers & Peripherals	Computer, IT & telecom	25.4012	Estimated from external data based on product description	1678.97	66.1	ISO	(not reported by company)	N/a	N/a (no %change reported)	N/a (product with insufficient stage-level data)	N/a (product with insufficient stage-level data)	N/a (product with insufficient stage-level data)	N/a (product with insufficient stage-level data)	N/a (product with insufficient stage-level data)	N/a (product with insufficient stage-level data)	Concatenated fields product name and product description into field product name to give richer product description
10666-24-2014	2014	No	MX611DE - Mono Laser Printer	Mono Laser Printer	Lexmark International, Inc.	USA	Technology Hardware & Equipment	Computers & Peripherals	Computer, IT & telecom	28.032	Estimated from external data based on product description	2132.34	76.07	ISO	(not reported by company)	N/a	N/a (no %change reported)	N/a (product with insufficient stage-level data)	N/a (product with insufficient stage-level data)	N/a (product with insufficient stage-level data)	N/a (product with insufficient stage-level data)	N/a (product with insufficient stage-level data)	N/a (product with insufficient stage-level data)	Concatenated fields product name and product description into field product name to give richer product description
10666-25-2014	2014	No	MX710DE - Mono Laser Printer	Mono Laser Printer	Lexmark International, Inc.	USA	Technology Hardware & Equipment	Computers & Peripherals	Computer, IT & telecom	57.1526	Estimated from external data based on product description	2923.11	51.15	ISO	(not reported by company)	N/a	N/a (no %change reported)	N/a (product with insufficient stage-level data)	N/a (product with insufficient stage-level data)	N/a (product with insufficient stage-level data)	N/a (product with insufficient stage-level data)	N/a (product with insufficient stage-level data)	N/a (product with insufficient stage-level data)	Concatenated fields product name and product description into field product name to give richer product description
10666-26-2014	2014	No	MX711DE - Mono Laser Printer	Mono Laser Printer	Lexmark International, Inc.	USA	Technology Hardware & Equipment	Computers & Peripherals	Computer, IT & telecom	57.1526	Estimated from external data based on product description	3127.25	54.72	ISO	(not reported by company)	N/a	N/a (no %change reported)	N/a (product with insufficient stage-level data)	N/a (product with insufficient stage-level data)	N/a (product with insufficient stage-level data)	N/a (product with insufficient stage-level data)	N/a (product with insufficient stage-level data)	N/a (product with insufficient stage-level data)	Concatenated fields product name and product description into field product name to give richer product description
10666-27-2014	2014	No	MX810DFE - Mono Laser Printer	Mono Laser Printer	Lexmark International, Inc.	USA	Technology Hardware & Equipment	Computers & Peripherals	Computer, IT & telecom	118.07	Estimated from external data based on product description	2536.12	21.48	ISO	(not reported by company)	N/a	N/a (no %change reported)	N/a (product with insufficient stage-level data)	N/a (product with insufficient stage-level data)	N/a (product with insufficient stage-level data)	N/a (product with insufficient stage-level data)	N/a (product with insufficient stage-level data)	N/a (product with insufficient stage-level data)	Concatenated fields product name and product description into field product name to give richer product description
10666-28-2014	2014	No	MX811DFE - Mono Laser Printer	Mono Laser Printer	Lexmark International, Inc.	USA	Technology Hardware & Equipment	Computers & Peripherals	Computer, IT & telecom	118.07	Estimated from external data based on product description	2973.37	25.18	ISO	(not reported by company)	N/a	N/a (no %change reported)	N/a (product with insufficient stage-level data)	N/a (product with insufficient stage-level data)	N/a (product with insufficient stage-level data)	N/a (product with insufficient stage-level data)	N/a (product with insufficient stage-level data)	N/a (product with insufficient stage-level data)	Concatenated fields product name and product description into field product name to give richer product description
10666-29-2014	2014	No	MX812DFE - Mono Laser Printer	Mono Laser Printer	Lexmark International, Inc.	USA	Technology Hardware & Equipment	Computers & Peripherals	Computer, IT & telecom	118.07	Estimated from external data based on product description	3335.99	28.25	Not reported	(not reported by company)	N/a	N/a (no %change reported)	N/a (product with insufficient stage-level data)	N/a (product with insufficient stage-level data)	N/a (product with insufficient stage-level data)	N/a (product with insufficient stage-level data)	N/a (product with insufficient stage-level data)	N/a (product with insufficient stage-level data)	Concatenated fields product name and product description into field product name to give richer product description
10666-3-2014	2014	No	CX510DE - Color Laser Printer	Color Laser Printer	Lexmark International, Inc.	USA	Technology Hardware & Equipment	Computers & Peripherals	Computer, IT & telecom	32.6587	Estimated from external data based on product description	3128.86	95.8	ISO	(not reported by company)	N/a	N/a (no %change reported)	N/a (product with insufficient stage-level data)	N/a (product with insufficient stage-level data)	N/a (product with insufficient stage-level data)	N/a (product with insufficient stage-level data)	N/a (product with insufficient stage-level data)	N/a (product with insufficient stage-level data)	Concatenated fields product name and product description into field product name to give richer product description
10666-4-2014	2014	No	CS310DN - Color Laser Printer	Color Laser Printer	Lexmark International, Inc.	USA	Technology Hardware & Equipment	Computers & Peripherals	Computer, IT & telecom	20.3209	Estimated from external data based on product description	1968.62	96.88	ISO	(not reported by company)	N/a	N/a (no %change reported)	N/a (product with insufficient stage-level data)	N/a (product with insufficient stage-level data)	N/a (product with insufficient stage-level data)	N/a (product with insufficient stage-level data)	N/a (product with insufficient stage-level data)	N/a (product with insufficient stage-level data)	Concatenated fields product name and product description into field product name to give richer product description
10666-5-2014	2014	No	CS410DN - Color Laser Printer	Color Laser Printer	Lexmark International, Inc.	USA	Technology Hardware & Equipment	Computers & Peripherals	Computer, IT & telecom	20.5024	Estimated from external data based on product description	3143.48	153.32	ISO	(not reported by company)	N/a	N/a (no %change reported)	N/a (product with insufficient stage-level data)	N/a (product with insufficient stage-level data)	N/a (product with insufficient stage-level data)	N/a (product with insufficient stage-level data)	N/a (product with insufficient stage-level data)	N/a (product with insufficient stage-level data)	Concatenated fields product name and product description into field product name to give richer product description
10666-6-2014	2014	No	CS510DE - Color Laser Printer	Color Laser Printer	Lexmark International, Inc.	USA	Technology Hardware & Equipment	Computers & Peripherals	Computer, IT & telecom	20.9106	Estimated from external data based on product description	3024.6	144.64	ISO	(not reported by company)	N/a	N/a (no %change reported)	N/a (product with insufficient stage-level data)	N/a (product with insufficient stage-level data)	N/a (product with insufficient stage-level data)	N/a (product with insufficient stage-level data)	N/a (product with insufficient stage-level data)	N/a (product with insufficient stage-level data)	Concatenated fields product name and product description into field product name to give richer product description
10666-7-2014	2014	No	M5163 - Mono Laser Printer	Mono Laser Printer	Lexmark International, Inc.	USA	Technology Hardware & Equipment	Computers & Peripherals	Computer, IT & telecom	23.7002	Estimated from external data based on product description	2597.12	109.58	ISO	(not reported by company)	N/a	N/a (no %change reported)	N/a (product with insufficient stage-level data)	N/a (product with insufficient stage-level data)	N/a (product with insufficient stage-level data)	N/a (product with insufficient stage-level data)	N/a (product with insufficient stage-level data)	N/a (product with insufficient stage-level data)	Concatenated fields product name and product description into field product name to give richer product description
10666-8-2014	2014	No	MS310DN - Mono Laser Printer	Mono Laser Printer	Lexmark International, Inc.	USA	Technology Hardware & Equipment	Computers & Peripherals	Computer, IT & telecom	15.8077	Estimated from external data based on product description	1504.51	95.18	ISO	(not reported by company)	N/a	N/a (no %change reported)	N/a (product with insufficient stage-level data)	N/a (product with insufficient stage-level data)	N/a (product with insufficient stage-level data)	N/a (product with insufficient stage-level data)	N/a (product with insufficient stage-level data)	N/a (product with insufficient stage-level data)	Concatenated fields product name and product description into field product name to give richer product description
10666-9-2014	2014	No	MS312DN - Mono Laser Printer	Mono Laser Printer	Lexmark International, Inc.	USA	Technology Hardware & Equipment	Computers & Peripherals	Computer, IT & telecom	15.8077	Estimated from external data based on product description	1490.36	94.28	ISO	(not reported by company)	N/a	N/a (no %change reported)	N/a (product with insufficient stage-level data)	N/a (product with insufficient stage-level data)	N/a (product with insufficient stage-level data)	N/a (product with insufficient stage-level data)	N/a (product with insufficient stage-level data)	N/a (product with insufficient stage-level data)	Concatenated fields product name and product description into field product name to give richer product description
10667-1-2014	2014	No	Mobile Batteries	With its high productivity and technological superiority, LG Chem accounts for 20% of the global market share. Mobile batteries are widely used in portable media devices such as laptops, cell phones, and tablets. To align our productivity with the rapid growth of smartphones, ultra-book laptops, and tablets, we are assembling more production lines for lithium-ion polymer batteries. Also, we are p…	LG Chem Ltd	South Korea	Materials	Chemicals	Chemicals	1000	As per company's submission to CDP	5846	5.85	GHGP	0.32	According to newly installed assembly lines in Nanjing plant in 2013, the GHG emissions rose due to the increased electricity consumptions. The trend on rising electricity consumption level has close connection to the increased GHG emissions per the unit. The ratio of sales to Acer during 2013 shows a small difference relative to the one in 2012, so we estimate that the change in this row may not…	Product carbon efficiency changed	N/a (product with insufficient stage-level data)	N/a (product with insufficient stage-level data)	N/a (product with insufficient stage-level data)	N/a (product with insufficient stage-level data)	N/a (product with insufficient stage-level data)	N/a (product with insufficient stage-level data)	Changed organisation from "LG Chem" to "LG Chem Ltd"
10667-1-2015	2015	No	Mobile Batteries	LG Chem's Mobile Batteries is leading the global lithium-ion battery market with excellent technology and productivity.	LG Chem Ltd	South Korea	Chemicals	Not used for 2015 reporting	Chemicals	1000	As per company's submission to CDP	10245	10.25	GHGP	0.7524	1. New facilities' start-up operation is the primary cause of the change as they consumed energy, particularly electricity, without manufacturing. 2. The increase of the total GHG emissions from the plant is bigger than the increase of sales ratio by Acer. (132% of GHG emissions increased as the plant total emissions, comparing to 121% of sales ratio increased by Acer in 2014)	Product carbon efficiency changed	N/a (product with insufficient stage-level data)	N/a (product with insufficient stage-level data)	N/a (product with insufficient stage-level data)	N/a (product with insufficient stage-level data)	N/a (product with insufficient stage-level data)	N/a (product with insufficient stage-level data)	None
10667-2-2013	2013	No	LG Chem’s automotive batteries are sustaining the undisputed No.1 position in the world based on more than 10 years of R&D capability. LG Chem is equipped with solutions for all types of electrical cars (Hybrid EV, Plugged-in EV, Battery EV) based on strong product development capability and manufacturing competitiveness via mass production experience. This enables LG Chem to supply battery cell,…	LG Chem’s automotive batteries are sustaining the undisputed No.1 position in the world based on more than 10 years of R&D capability. LG Chem is equipped with solutions for all types of electrical cars (Hybrid EV, Plugged-in EV, Battery EV) based on strong product development capability and manufacturing competitiveness via mass production experience. This enables LG Chem to supply battery cell,…	LG Chem Ltd	South Korea	Materials	Chemicals	Chemicals	1000	As per company's submission to CDP	3197.1	3.2	GHGP	0.0016	N/a	No specific reason reported	N/a (product with insufficient stage-level data)	N/a (product with insufficient stage-level data)	N/a (product with insufficient stage-level data)	N/a (product with insufficient stage-level data)	N/a (product with insufficient stage-level data)	N/a (product with insufficient stage-level data)	Changed organisation from "LG Chem" to "LG Chem Ltd"
10667-2-2014	2014	No	Automotive Batteries	LG Chem has maintained the undisputed No.1 position in the global automotive battery market with more than 10 years of R&D capability. We are equipped with solutions for all types of electrical cars (Hybrid EV, Plugged-in EV, and Battery EV) based on our strong product development capability and manufacturing competitiveness. This allows LG Chem to supply battery cells, packs, and BMS (Battery Ma…	LG Chem Ltd	South Korea	Materials	Chemicals	Chemicals	1000	As per company's submission to CDP	3113	3.11	GHGP	-0.0263	Intensive energy-saving projects conducted in Ochang 1 plant in 2013 would have positive impacts on GHG emission reductions per the unit.	Product carbon efficiency changed	N/a (product with insufficient stage-level data)	N/a (product with insufficient stage-level data)	N/a (product with insufficient stage-level data)	N/a (product with insufficient stage-level data)	N/a (product with insufficient stage-level data)	N/a (product with insufficient stage-level data)	Changed organisation from "LG Chem" to "LG Chem Ltd"
10667-2-2015	2015	No	Automotive Batteries	Using its excellent technology and quality competency, LG Chem supplies safe batteries for electric vehicles to top carmakers in Korea, U.S., Europe and China. The batteries, applied to green and highly efficient vehicles like electric and hybrid vehicles, are adding environmental values.	LG Chem Ltd	South Korea	Chemicals	Not used for 2015 reporting	Chemicals	1000	As per company's submission to CDP	6309	6.31	GHGP	1.0268	CMI plant did not operate its facilities on a regular basis in 2014 for fluctuation of production plans, which attributed to having energy intensity worsened. Plenty of electricity and steam were used for facilities' start-up without production. Final products were produced and transported only from Ochang 1 plant in 2013 which has a relatively greater energy intensity. The total emissions from O…	Product carbon efficiency changed	N/a (product with insufficient stage-level data)	N/a (product with insufficient stage-level data)	N/a (product with insufficient stage-level data)	N/a (product with insufficient stage-level data)	N/a (product with insufficient stage-level data)	N/a (product with insufficient stage-level data)	None
10667-2-2016	2016	No	Automotive Battery	Using its excellent technology and quality competency, LG Chem supplies safe batteries for electric vehicles to top carmakers in Korea, U.S., Europe and China. The batteries, applied to green and highly efficient vehicles like electric and hybrid vehicles, are adding environmental values.	LG Chem Ltd	South Korea	Materials	Chemicals	Chemicals	1000	Estimated from external data based on product description	4286	4.29	GHGP	-0.82	A decrease in sales to Ford and a volume change of each product affect the change. Also Ochang 1 plant conducted many energy saving activities for more energy efficiency during manufacturing. The emissions of FCA are newly counted this year, because we started to formally sell our automotive batteries to FCA in 2016.	Model/parameters AND product carbon efficiency changed	N/a (product with insufficient stage-level data)	N/a (product with insufficient stage-level data)	N/a (product with insufficient stage-level data)	N/a (product with insufficient stage-level data)	N/a (product with insufficient stage-level data)	N/a (product with insufficient stage-level data)	None
10667-3-2015	2015	No	ABS (Acrylonitrile Butadiene Styrene)	LG Chem is leading domestic and international ABS markets by producing and supplying a variety of high-functional ABS products that are widely used in such applications as electrics/electronics, auto parts, industrial materials, and household items.	LG Chem Ltd	South Korea	Chemicals	Not used for 2015 reporting	Chemicals	1000	As per company's submission to CDP	876	0.88	GHGP	-0.0427	Conducted energy-saving activities, in spite of its limited saving potential.	Product carbon efficiency changed	N/a (product with insufficient stage-level data)	N/a (product with insufficient stage-level data)	N/a (product with insufficient stage-level data)	N/a (product with insufficient stage-level data)	N/a (product with insufficient stage-level data)	N/a (product with insufficient stage-level data)	Swapped contents of fields "Date of previous" and "Explanation for change"
10667-3-2016	2016	No	ABS(Acrylonitrile Butadiene Styrene)	LG Chem is leading domestic and international ABS markets by producing and supplying a variety of high-functional ABS products that are widely used in such applications as electrics/electronics, auto parts, industrial materials, and household items.	LG Chem Ltd	South Korea	Materials	Chemicals	Chemicals	1000	Estimated from external data based on product description	396	0.4	GHGP	-0.43	Hwachi plant conducted many active energy saving activities, in spite of its limited saving potential.	Product carbon efficiency changed	N/a (product with insufficient stage-level data)	N/a (product with insufficient stage-level data)	N/a (product with insufficient stage-level data)	N/a (product with insufficient stage-level data)	N/a (product with insufficient stage-level data)	N/a (product with insufficient stage-level data)	None
10667-4-2016	2016	No	BPA(Bisphenol-A)	LG Chem is leading domestic and international BPA markets by producing and supplying high-quality BPA.	LG Chem Ltd	South Korea	Materials	Chemicals	Chemicals	1000	Estimated from external data based on product description	1088	1.09	GHGP	(not reported by company)	N/a	N/a (no previous data available)	N/a (product with insufficient stage-level data)	N/a (product with insufficient stage-level data)	N/a (product with insufficient stage-level data)	N/a (product with insufficient stage-level data)	N/a (product with insufficient stage-level data)	N/a (product with insufficient stage-level data)	None
10667-5-2016	2016	No	IT&New Application Battery	LG Chem's IT Batteries is leading the global lithium-ion battery market with excellent technology and productivity.	LG Chem Ltd	South Korea	Materials	Chemicals	Chemicals	1000	Estimated from external data based on product description	10607	10.61	GHGP	0.0357	A big increase is caused by the new customers requesting CDP supply chain this year such as Dell Inc. and HP Inc., who was not counted last year. Also a rise in sales of new products which have different manufacturing efficiencies affects the allocation of Acer Inc. and Stanley Black & Decker Inc..	Model/parameters AND product carbon efficiency changed	N/a (product with insufficient stage-level data)	N/a (product with insufficient stage-level data)	N/a (product with insufficient stage-level data)	N/a (product with insufficient stage-level data)	N/a (product with insufficient stage-level data)	N/a (product with insufficient stage-level data)	%Change reduced 100-fold (consistent with CO2e for product versus 2015 report)
10670-1-2013	2013	Yes	LG-E970	Field not included in 2013 data	LG Electronics	South Korea	Consumer Durables & Apparel	Household Durables	Home durables, textiles, & equipment	0.1471	Estimated from external data based on product description	7	47.59	ISO	-0.3235	Reduction of emission of pre-manufacturing stage	Product carbon efficiency changed	No	0.1128	0.0001	0.887	0.3507	0	None
10834-1-2015	2015	Yes	Mouse, M185	Cordless Mouse, with battery in Clamshell packaging.	Logitech International SA	Switzerland	Technology Hardware & Equipment	Not used for 2015 reporting	Computer, IT & telecom	0.136	Estimated from external data based on product description	4.32	31.76	Not reported	(not reported by company)	N/a	N/a (no previous data available)	No	0.0463	0.6042	0.3495	0.0116	0.0139	None
1085-1-2013	2013	Yes	White crystalline sugar	Field not included in 2013 data	Associated British Foods	United Kingdom	Food, Beverage & Tobacco	Food Products	Food & Beverage	1000	As per company's submission to CDP	650	0.65	PAS2050	(not reported by company)	N/a	N/a (no previous data available)	No	0.4615	0.5385	0	(included in up/downstream but not reported separately)	(included in downstream but not reported separately)	None
1085-1-2014	2014	No	Sugar	white crystalline sugar	Associated British Foods	United Kingdom	Food, Beverage & Tobacco	Food Products	Food & Beverage	1000	As per company's submission to CDP	650	0.65	PAS2050	0.05	N/a	No specific reason reported	N/a (product with insufficient stage-level data)	N/a (product with insufficient stage-level data)	N/a (product with insufficient stage-level data)	N/a (product with insufficient stage-level data)	N/a (product with insufficient stage-level data)	N/a (product with insufficient stage-level data)	None
1085-1-2016	2016	No	Sugar	White crystalline solid	Associated British Foods	United Kingdom	Food, Beverage & Tobacco	Beverages	Food & Beverage	1000	As per company's submission to CDP	650	0.65	PAS2050	(not reported by company)	N/a	N/a (no %change reported)	N/a (product with insufficient stage-level data)	N/a (product with insufficient stage-level data)	N/a (product with insufficient stage-level data)	N/a (product with insufficient stage-level data)	N/a (product with insufficient stage-level data)	N/a (product with insufficient stage-level data)	None
11152-1-2013	2013	No	grinding media cast.	Field not included in 2013 data	MAGOTTEAUX	Brazil	Materials	Metals & Mining	Construction & commercial materials	1500	As per company's submission to CDP	1750	1.17	GHGP	0.42	N/a	No specific reason reported	N/a (product with insufficient stage-level data)	N/a (product with insufficient stage-level data)	N/a (product with insufficient stage-level data)	N/a (product with insufficient stage-level data)	N/a (product with insufficient stage-level data)	N/a (product with insufficient stage-level data)	None
11632-1-2016	2016	Yes	IC chips of Smartphone	The smartphone has already become an indispensable part of our daily life. We cannot be without our smartphones for all sorts of activities—whether communicating with our friends and family or enjoying music, photography, or filming videos, or even exploring the vast information available online. Hence, we have developed this innovative product due to users' needs for longer battery life and inte…	MediaTek	Taiwan	Semiconductors & Semiconductor Equipment	Semiconductors & Semiconductor Equipment	Computer, IT & telecom	0.1	Estimated from external data based on product description	1.719	17.19	GHGP	(not reported by company)	N/a	N/a (no %change reported)	Yes	0.7239	0.2761	0	(included in up/downstream but not reported separately)	(included in downstream but not reported separately)	None
1198-1-2013	2013	No	1 DVD Software Package	Field not included in 2013 data	Autodesk, Inc.	USA	Software & Services	Software	Computer, IT & telecom	0.0907185	Estimated from external data based on product description	1.28	14.11	GHGP	-0.4	Decrease from product manual removal and reduced packaging.	Product carbon efficiency changed	N/a (product with insufficient stage-level data)	N/a (product with insufficient stage-level data)	N/a (product with insufficient stage-level data)	N/a (product with insufficient stage-level data)	N/a (product with insufficient stage-level data)	N/a (product with insufficient stage-level data)	None
1198-1-2014	2014	Yes	DVD software	The products that are delivered on a single DVD, such as AutoCAD.	Autodesk, Inc.	USA	Software & Services	Software	Computer, IT & telecom	0.0907185	Estimated from external data based on product description	1.28	14.11	GHGP	(not reported by company)	N/a	N/a (no %change reported)	No	0.4405	0.1115	0.4479	0.4045	0.0435	None
1198-1-2015	2015	Yes	DVD software (1 DVD)	The products that are delivered on a single DVD, such as AutoCAD.	Autodesk, Inc.	USA	Software & Services	Not used for 2015 reporting	Computer, IT & telecom	0.0907185	Estimated from external data based on product description	1.28	14.11	GHGP	(not reported by company)	N/a	N/a (no %change reported)	No	0.4405	0.1115	0.448	0.4044	0.0435	None
1198-2-2013	2013	Yes	USB Software	Field not included in 2013 data	Autodesk, Inc.	USA	Software & Services	Software	Computer, IT & telecom	0.0085	Estimated from external data based on product description	2.285	268.82	GHGP	(not reported by company)	N/a	N/a (no %change reported)	No	0.7554	0.0222	0.2224	0.2747	0.0269	None
1198-2-2014	2014	Yes	USB software	The products that are delivered on a USB, such as many of our suites, which include multiple pieces of software on one USB.	Autodesk, Inc.	USA	Software & Services	Software	Computer, IT & telecom	0.0085	Estimated from external data based on product description	2.29	269.41	GHGP	(not reported by company)	N/a	N/a (no %change reported)	No	0.6761	0.0222	0.3017	0.2747	0.0269	None
1198-2-2015	2015	Yes	USB software	The products that are delivered on a USB, such as many of our suites, which include multiple pieces of software on one USB.	Autodesk, Inc.	USA	Software & Services	Not used for 2015 reporting	Computer, IT & telecom	0.0085	Estimated from external data based on product description	2.29	269.41	GHGP	(not reported by company)	N/a	N/a (no %change reported)	No	0.6761	0.0222	0.3017	0.2747	0.027	None
1198-4-2015	2015	Yes	DVD software (2 DVDs)	The products that are delivered on a 2 DVDs, such as a few of our suites.	Autodesk, Inc.	USA	Software & Services	Not used for 2015 reporting	Computer, IT & telecom	0.181437	Estimated from external data based on product description	1.67	9.2	GHGP	(not reported by company)	N/a	N/a (no %change reported)	No	0.4372	0.1713	0.3915	0.3556	0.0358	None
12084-1-2016	2016	No	Filtro 26 WS	Plug wrap paper of 26 gr/m2 basis weight.	Miquel Y Costas	Spain	Materials	Paper & Forest Products	Construction & commercial materials	1	As per company's submission to CDP	3	3	GHGP	-0.0196	During 2016 various energy efficiency projects were implemented and helped to decrease CO2 emissions per unit.	Product carbon efficiency changed	N/a (product with insufficient stage-level data)	N/a (product with insufficient stage-level data)	N/a (product with insufficient stage-level data)	N/a (product with insufficient stage-level data)	N/a (product with insufficient stage-level data)	N/a (product with insufficient stage-level data)	None
12117-1-2013	2013	No	Dell Laptop	Field not included in 2013 data	MITIE Group	United Kingdom	Commercial & Professional Services	Commercial Services & Supplies	Home durables, textiles, & equipment	2.32	Estimated from external data based on product description	320	137.93	ISO	(not reported by company)	N/a	N/a (no %change reported)	N/a (product with insufficient stage-level data)	N/a (product with insufficient stage-level data)	N/a (product with insufficient stage-level data)	N/a (product with insufficient stage-level data)	N/a (product with insufficient stage-level data)	N/a (product with insufficient stage-level data)	None
12117-2-2013	2013	No	Kimberley-Clark toilet tissue, 10,000 sheets	Field not included in 2013 data	MITIE Group	United Kingdom	Commercial & Professional Services	Commercial Services & Supplies	Home durables, textiles, & equipment	4.2	Estimated from external data based on product description	20	4.76	ISO	-0.03	Change in supplier	Product carbon efficiency changed	N/a (product with insufficient stage-level data)	N/a (product with insufficient stage-level data)	N/a (product with insufficient stage-level data)	N/a (product with insufficient stage-level data)	N/a (product with insufficient stage-level data)	N/a (product with insufficient stage-level data)	None
12134-1-2017	2017	Yes	Paraformaldehyde	Chemicals	Mitsubishi Gas Chemical Company, Inc.	Japan	Materials	Chemicals	Chemicals	500	As per company's submission to CDP	200	0.4	Not reported	0.16	N/a	No specific reason reported	Yes	0.565	0.2993	0.1357	0.1357	(included in downstream but not reported separately)	None
12134-2-2017	2017	Yes	Methacrylic acid	Chemicals	Mitsubishi Gas Chemical Company, Inc.	Japan	Materials	Chemicals	Chemicals	20	As per company's submission to CDP	71	3.55	Not reported	0.11	N/a	No specific reason reported	Yes	0.6444	0.3413	0.0143	0.0143	(included in downstream but not reported separately)	None
12134-3-2017	2017	Yes	Hydrogen peroxide	Chemicals	Mitsubishi Gas Chemical Company, Inc.	Japan	Materials	Chemicals	Chemicals	20	As per company's submission to CDP	4	0.2	Not reported	0.002	N/a	No specific reason reported	Yes	0.6522	0.3454	0.0024	0.0024	(included in downstream but not reported separately)	None
12134-4-2017	2017	Yes	Amines	Chemicals	Mitsubishi Gas Chemical Company, Inc.	Japan	Materials	Chemicals	Chemicals	9	As per company's submission to CDP	8	0.89	Not reported	-0.02	N/a	No specific reason reported	Yes	0.6368	0.3373	0.026	0.026	(included in downstream but not reported separately)	None
12134-5-2017	2017	Yes	Peroxides	Chemicals	Mitsubishi Gas Chemical Company, Inc.	Japan	Materials	Chemicals	Chemicals	25	As per company's submission to CDP	42	1.68	Not reported	-0.004	N/a	No specific reason reported	Yes	0.6382	0.338	0.0238	0.0238	(included in downstream but not reported separately)	None
12134-6-2017	2017	No	Super-pure hydrogen peroxide	cleaning chemical	Mitsubishi Gas Chemical Company, Inc.	Japan	Materials	Chemicals	Chemicals	17736	As per company's submission to CDP	6469	0.36	Not reported	-0.11	The delivery of super-pure hydrogen peroxide to ISR needs longer transport than other factories of customer. The delivery to ISR in FY2016 was less than FY2015. Therefore, the emissions of CO2 per unit of super-pure hydrogen peroxide decreased.	Product carbon efficiency changed	N/a (product with insufficient stage-level data)	N/a (product with insufficient stage-level data)	N/a (product with insufficient stage-level data)	N/a (product with insufficient stage-level data)	N/a (product with insufficient stage-level data)	N/a (product with insufficient stage-level data)	Removed special characters from "explanation for change" for readibility
12134-7-2017	2017	Yes	ELM	cleaning chemical	Mitsubishi Gas Chemical Company, Inc.	Japan	Materials	Chemicals	Chemicals	160	As per company's submission to CDP	139	0.87	Not reported	-0.01	The container for BLU20 is heavier than the containers of other products, and BLU20 causes more CO2 emissions during its transport. The delivery of BLU20 in FY2016 was less than FY2015. Therefore, the emissions of CO2 per unit of ELM decreased.	Product carbon efficiency changed	Yes	0.0713	0.0377	0.891	0.891	(included in downstream but not reported separately)	Removed special characters from "explanation for change" for readibility
12134-8-2017	2017	Yes	TCDE	Chemicals	Mitsubishi Gas Chemical Company, Inc.	Japan	Materials	Chemicals	Chemicals	12000	As per company's submission to CDP	99075	8.26	Not reported	0.15	N/a	No specific reason reported	Yes	0.6495	0.344	0.0066	0.0066	(included in downstream but not reported separately)	None
12289-1-2017	2017	No	Zinc Oxide	Rubber Vulcanization Acceleration Aid	Mitsui Mining & Smelting Co., Ltd.	Japan	Capital Goods	Aerospace & Defense	Comm. equipm. & capital goods	20	As per company's submission to CDP	5.6724	0.28	WBCSD	(not reported by company)	N/a	N/a (no %change reported)	N/a (product with insufficient stage-level data)	N/a (product with insufficient stage-level data)	N/a (product with insufficient stage-level data)	N/a (product with insufficient stage-level data)	N/a (product with insufficient stage-level data)	N/a (product with insufficient stage-level data)	None
12348-1-2013	2013	No	500ml Coors Light brewed in the UK (steal can) CO2e expressed in CO2e/ hl	500ml Coors Light brewed in the UK (steal can) CO2e expressed in CO2e/ hl	Molson Coors Brewing Company	USA	Food, Beverage & Tobacco	Beverages	Food & Beverage	100	As per company's submission to CDP	31.37	0.31	ISO	-0.0049	change in secondary packaging format from high cone to shrink film.	Product carbon efficiency changed	N/a (product with insufficient stage-level data)	N/a (product with insufficient stage-level data)	N/a (product with insufficient stage-level data)	N/a (product with insufficient stage-level data)	N/a (product with insufficient stage-level data)	N/a (product with insufficient stage-level data)	Changed end of life emissions to negative sign (according to text explanation)
12348-2-2013	2013	No	Carling brewed in the UK, 24 440ml cans in 4 packs	Field not included in 2013 data	Molson Coors Brewing Company	USA	Food, Beverage & Tobacco	Beverages	Food & Beverage	12.029	Estimated from external data based on product description	3.02	0.25	ISO	-0.0088	Project to move to shrink film secondary packaging.	Product carbon efficiency changed	N/a (product with insufficient stage-level data)	N/a (product with insufficient stage-level data)	N/a (product with insufficient stage-level data)	N/a (product with insufficient stage-level data)	N/a (product with insufficient stage-level data)	N/a (product with insufficient stage-level data)	Changed end of life emissions to negative sign (according to text explanation); Streamlined product name to be the same across stages and years
12348-2-2014	2014	No	Carling brewed in the UK, 24 440ml cans in 4 packs	Carling brewed in the UK, 24 440ml cans in 4 packs.	Molson Coors Brewing Company	USA	Food, Beverage & Tobacco	Beverages	Food & Beverage	12.029	Estimated from external data based on product description	3.07	0.26	Not reported	-0.0055	Can end light weighting project.	Product carbon efficiency changed	N/a (product with insufficient stage-level data)	N/a (product with insufficient stage-level data)	N/a (product with insufficient stage-level data)	N/a (product with insufficient stage-level data)	N/a (product with insufficient stage-level data)	N/a (product with insufficient stage-level data)	Streamlined product name to be the same across stages and years
12348-3-2013	2013	No	Carling brewed in the UK, 24 568ml cans in 4 packs	Field not included in 2013 data	Molson Coors Brewing Company	USA	Food, Beverage & Tobacco	Beverages	Food & Beverage	15.53	Estimated from external data based on product description	2.06	0.13	ISO	(not reported by company)	N/a	N/a (no %change reported)	N/a (product with insufficient stage-level data)	N/a (product with insufficient stage-level data)	N/a (product with insufficient stage-level data)	N/a (product with insufficient stage-level data)	N/a (product with insufficient stage-level data)	N/a (product with insufficient stage-level data)	Changed end of life emissions to negative sign (according to text explanation); streamlined product name to be the same across stages and years
12348-3-2014	2014	No	Carling brewed in the UK, 24 568ml cans in 4 packs	Carling brewed in the UK, 24 568ml cans in 4 packs.	Molson Coors Brewing Company	USA	Food, Beverage & Tobacco	Beverages	Food & Beverage	15.53	Estimated from external data based on product description	2.0519	0.13	ISO	-0.0107	Can end light weighting project.	Product carbon efficiency changed	N/a (product with insufficient stage-level data)	N/a (product with insufficient stage-level data)	N/a (product with insufficient stage-level data)	N/a (product with insufficient stage-level data)	N/a (product with insufficient stage-level data)	N/a (product with insufficient stage-level data)	Changed end of life emissions to negative sign (according to text explanation); streamlined product name to be the same across stages and years
12348-4-2014	2014	Yes	Coors Light brewed in the UK, 24 500ml cans in 4 packs	Coors light brewed in the UK, sold in 24 500ml steel cans in 4 packs.	Molson Coors Brewing Company	USA	Food, Beverage & Tobacco	Beverages	Food & Beverage	13.67	Estimated from external data based on product description	3.732	0.27	ISO	-0.0086	Can end light weighting project.	Product carbon efficiency changed	No	0.6493	0.2858	0.0649	0.0614	(included in downstream but not reported separately)	Streamlined product name to be the same across stages and years
12903-1-2015	2015	Yes	Server	IT equipment	NEC Corporation	Japan	Technology Hardware & Equipment	Not used for 2015 reporting	Computer, IT & telecom	19.28	Estimated from external data based on product description	1600	82.99	ISO	-0.53	To improve the product performance, especially to support operation in a 40 degree Celsius (104 degree Fahrenheit) environment. However, in comparison with the increasing of product performance, the products are designed in an energy efficient way, which means products produce less CO2.	Product carbon efficiency changed	Yes	0.054	0.0206	0.9254	0.0334	0.0012	None
12903-2-2015	2015	No	Broadband Routers	IT equipment	NEC Corporation	Japan	Technology Hardware & Equipment	Not used for 2015 reporting	Computer, IT & telecom	0.816	Estimated from external data based on product description	56	68.63	ISO	-0.3	Generally speaking, performances on hardware products are improved year by year.	Product carbon efficiency changed	N/a (product with insufficient stage-level data)	N/a (product with insufficient stage-level data)	N/a (product with insufficient stage-level data)	N/a (product with insufficient stage-level data)	N/a (product with insufficient stage-level data)	N/a (product with insufficient stage-level data)	None
12903-3-2015	2015	Yes	Mobile Network Equipment	IT equipment	NEC Corporation	Japan	Technology Hardware & Equipment	Not used for 2015 reporting	Computer, IT & telecom	19.28	Estimated from external data based on product description	10273	532.83	ISO	-0.04	Generally speaking, performances on hardware products are improved year by year.	Product carbon efficiency changed	Yes	0.0183	0.007	0.9748	0	0.0001	None
12942-1-2013	2013	Yes	1 dl cup of spray dried soluble Nescafé coffee ready to be drunk, at the consumer’s home	1 dl cup of spray dried soluble Nescafé coffee ready to be drunk, at the consumer’s home	Nestlé	Switzerland	Food, Beverage & Tobacco	Food Products	Food & Beverage	0.1	As per company's submission to CDP	0.07	0.7	French PEF	(not reported by company)	N/a	N/a (no %change reported)	No	0.2443	0.1603	0.5954	0.0458	(included in downstream but not reported separately)	None
12942-1-2014	2014	No	Nescafé soluble coffee	1 dl cup of spray dried soluble Nescafé coffee ready to be drunk, at the consumer’s home	Nestlé	Switzerland	Food, Beverage & Tobacco	Food Products	Food & Beverage	0.1	As per company's submission to CDP	0.032	0.32	ISO	(not reported by company)	N/a	N/a (no %change reported)	N/a (product with insufficient stage-level data)	N/a (product with insufficient stage-level data)	N/a (product with insufficient stage-level data)	N/a (product with insufficient stage-level data)	N/a (product with insufficient stage-level data)	N/a (product with insufficient stage-level data)	None
12942-1-2015	2015	No	Nescafé soluble coffee	1 dl cup of spray dried soluble Nescafé coffee ready to be drunk, at the consumer’s home	Nestlé	Switzerland	Food & Beverage Processing	Not used for 2015 reporting	Food & Beverage	0.1	As per company's submission to CDP	0.032	0.32	ISO	(not reported by company)	N/a	N/a (no %change reported)	N/a (product with insufficient stage-level data)	N/a (product with insufficient stage-level data)	N/a (product with insufficient stage-level data)	N/a (product with insufficient stage-level data)	N/a (product with insufficient stage-level data)	N/a (product with insufficient stage-level data)	None
12942-1-2016	2016	Yes	Nescafé soluble coffee	120 ml cup of spray dried soluble Nescafé coffee ready to be drunk, at the consumer’s home	Nestlé	Switzerland	Food, Beverage & Tobacco	Beverages	Food & Beverage	0.12	As per company's submission to CDP	0.052	0.43	ISO	(not reported by company)	N/a	N/a (no %change reported)	No	0.4961	0.1105	0.3934	0.0252	0	None
12942-2-2013	2013	Yes	EcoShape bottle of water (0.5 L): Serving of 500 ml of hydration to the consumer. The study examines the extraction and processing of all upstream raw materials to produce the products and packaging components; the manufacturing process; distribution logistics; product use and packaging disposal. The work has been conducted using the Ecoinvent database and SimaPro software. Climate change impacts…	EcoShape bottle of water (0.5 L): Serving of 500 ml of hydration to the consumer. The study examines the extraction and processing of all upstream raw materials to produce the products and packaging components; the manufacturing process; distribution logistics; product use and packaging disposal. The work has been conducted using the Ecoinvent database and SimaPro software. Climate change impacts…	Nestlé	Switzerland	Food, Beverage & Tobacco	Food Products	Food & Beverage	0.54167	Estimated from external data based on product description	0.1405	0.26	ISO	(not reported by company)	N/a	N/a (no %change reported)	No	0.4588	0.0492	0.492	0.4421	(included in downstream but not reported separately)	None
12942-2-2014	2014	Yes	EcoShape bottle of water (0.5 L)	Serving of 500 ml of hydration to the consumer. The study examined the extraction and processing of all upstream raw materials to produce the products and packaging components; the manufacturing process; distribution logistics; product use and packaging disposal. The work has been conducted using the Ecoinvent database and SimaPro software. Climate change impacts are measured in kg CO2 equivalent…	Nestlé	Switzerland	Food, Beverage & Tobacco	Food Products	Food & Beverage	0.54167	Estimated from external data based on product description	0.1405	0.26	ISO	(not reported by company)	N/a	N/a (no %change reported)	No	0.4575	0.0491	0.4934	0.4409	0	None
12942-2-2015	2015	Yes	EcoShape bottle of water (0.5 L)	Serving of 500 ml of hydration to the consumer. The study examined the extraction and processing of all upstream raw materials to produce the products and packaging components; the manufacturing process; distribution logistics; product use and packaging disposal. The work has been conducted using the Ecoinvent database and SimaPro software. Climate change impacts are measured in kg CO2 equivalent…	Nestlé	Switzerland	Food & Beverage Processing	Not used for 2015 reporting	Food & Beverage	0.54167	Estimated from external data based on product description	0.1405	0.26	ISO	(not reported by company)	N/a	N/a (no %change reported)	No	0.4575	0.0491	0.4934	0.4409	0	None
12942-2-2016	2016	Yes	EcoShape bottle of water (0.5 L)	Serving of 500 ml of hydration to the consumer. The study examined the extraction and processing of all upstream raw materials to produce the products and packaging components; the manufacturing process; distribution logistics; product use and packaging disposal. The work has been conducted using the Ecoinvent database and SimaPro software. Climate change impacts are measured in kg CO2 equivalent…	Nestlé	Switzerland	Food, Beverage & Tobacco	Beverages	Food & Beverage	0.54167	Estimated from external data based on product description	0.1405	0.26	Not reported	(not reported by company)	N/a	N/a (no %change reported)	No	0.4575	0.0491	0.4934	0.4409	0	None
12942-3-2013	2013	Yes	Nestlé Babyfood NaturNes packaging - plastic pot The good assessed:" Packaging systems used to provide one baby food meal in France, Spain, and Germany". The 200-g packaging size was selected as the basis for this study. (The total emissions in kg CO2-e per unit provided [in this report] is the figure for France as it is not possible to list all three data in one cell. Please find detail by count…	Nestlé Babyfood NaturNes packaging - plastic pot The good assessed:" Packaging systems used to provide one baby food meal in France, Spain, and Germany". The 200-g packaging size was selected as the basis for this study. (The total emissions in kg CO2-e per unit provided to the right of this cell is the figure for France as it is not possible to list all three data in one cell. Please find detail…	Nestlé	Switzerland	Food, Beverage & Tobacco	Food Products	Food & Beverage	0.02	Estimated from external data based on product description	0.184	9.2	ISO	(not reported by company)	N/a	N/a (no %change reported)	No	0.4402	0.0761	0.4837	0.413	0.0707	None
12942-4-2013	2013	Yes	Nestlé Babyfood NaturNes packaging - plastic pot The good assessed:" Packaging systems used to provide one baby food meal in France, Spain, and Germany". The 200-g packaging size was selected as the basis for this study. (The total emissions in kg CO2-e per unit provided [in this report] is the figure for France as it is not possible to list all three data in one cell. Please find detail by count…	Nestlé Babyfood NaturNes packaging - plastic pot The good assessed:" Packaging systems used to provide one baby food meal in France, Spain, and Germany". The 200-g packaging size was selected as the basis for this study. (The total emissions in kg CO2-e per unit provided to the right of this cell is the figure for France as it is not possible to list all three data in one cell. Please find detail…	Nestlé	Switzerland	Food, Beverage & Tobacco	Food Products	Food & Beverage	0.02	Estimated from external data based on product description	0.143	7.15	ISO	(not reported by company)	N/a	N/a (no %change reported)	No	0.5664	0.1329	0.3007	0.2867	0.014	Used Footprint from LCA stage "all" as the total footprint, and then deleted the LCA stage entry for "all" because it is redundant (see company's text entry under product name/description)
12942-5-2013	2013	Yes	Nestlé Babyfood NaturNes packaging - plastic pot The good assessed:" Packaging systems used to provide one baby food meal in France, Spain, and Germany". The 200-g packaging size was selected as the basis for this study. (The total emissions in kg CO2-e per unit provided [in this report] is the figure for France as it is not possible to list all three data in one cell. Please find detail by count…	Nestlé Babyfood NaturNes packaging - plastic pot The good assessed:" Packaging systems used to provide one baby food meal in France, Spain, and Germany". The 200-g packaging size was selected as the basis for this study. (The total emissions in kg CO2-e per unit provided to the right of this cell is the figure for France as it is not possible to list all three data in one cell. Please find detail…	Nestlé	Switzerland	Food, Beverage & Tobacco	Food Products	Food & Beverage	0.02	Estimated from external data based on product description	0.125	6.25	ISO	(not reported by company)	N/a	N/a (no %change reported)	No	0.648	0.112	0.24	0.224	0.016	Used Footprint from LCA stage "all" as the total footprint, and then deleted the LCA stage entry for "all" because it is redundant (see company's text entry under product name/description)
13360-1-2013	2013	Yes	Average mobile phone	Field not included in 2013 data	Nokia Group	Finland	Technology Hardware & Equipment	Communications Equipment	Computer, IT & telecom	0.218	Estimated from external data based on product description	12	55.05	ISO	(not reported by company)	N/a	N/a (no %change reported)	No	0.5417	0.0417	0.4167	0.1583	0.0083	None
13360-1-2014	2014	Yes	Mobile phone	Nokia produce a wide range of mobile & smart phones and we have calculated the related emissions and publish the information for each of the model in our product related web pages. Here we have provided data onG HG emissions related to an average product.	Nokia Group	Finland	Technology Hardware & Equipment	Communications Equipment	Computer, IT & telecom	0.218	Estimated from external data based on product description	12	55.05	ISO	(not reported by company)	N/a	N/a (no %change reported)	No	0.5417	0.0417	0.4167	0.1583	0.0083	None
13360-2-2013	2013	Yes	Nokia Lumia 800. Nokia's high end smart phone, mass = 142 g including battery.	Nokia Lumia 800. Nokia's high end smart phone, mass = 142 g including battery.	Nokia Group	Finland	Technology Hardware & Equipment	Communications Equipment	Computer, IT & telecom	0.142	As per company's submission to CDP	16	112.68	ISO	(not reported by company)	N/a	N/a (no %change reported)	No	0.6543	0.037	0.3086	0.142	0.0062	None
13360-3-2013	2013	Yes	Nokia Asha 300. Nokia's low end device, mass = 85 g incluging battery.	Nokia Asha 300. Nokia's low end device, mass = 85 g incluging battery.	Nokia Group	Finland	Technology Hardware & Equipment	Communications Equipment	Computer, IT & telecom	0.085	As per company's submission to CDP	8	94.12	ISO	(not reported by company)	N/a	N/a (no %change reported)	No	0.3783	0.0709	0.5508	0.1655	0.0071	None
13889-10-2017	2017	No	ECU	Fuel Pump ECU	OMRON Corporation	Japan	Technology Hardware & Equipment	Electronic Equipment, Instruments & Components	Computer, IT & telecom	1.06	Estimated from external data based on product description	7.5	7.08	GHGP	(not reported by company)	N/a	N/a (no %change reported)	N/a (product with insufficient stage-level data)	N/a (product with insufficient stage-level data)	N/a (product with insufficient stage-level data)	N/a (product with insufficient stage-level data)	N/a (product with insufficient stage-level data)	N/a (product with insufficient stage-level data)	None
13889-11-2017	2017	No	Laser radar	Laser radar	OMRON Corporation	Japan	Technology Hardware & Equipment	Electronic Equipment, Instruments & Components	Computer, IT & telecom	1.34	Estimated from external data based on product description	86.2	64.33	GHGP	(not reported by company)	N/a	N/a (no %change reported)	N/a (product with insufficient stage-level data)	N/a (product with insufficient stage-level data)	N/a (product with insufficient stage-level data)	N/a (product with insufficient stage-level data)	N/a (product with insufficient stage-level data)	N/a (product with insufficient stage-level data)	None
13889-1-2014	2014	No	Blood Pressure Monitor HEM-7113	BLANK	OMRON Corporation	Japan	Technology Hardware & Equipment	Electronic Equipment, Instruments & Components	Computer, IT & telecom	0.5448	Estimated from external data based on product description	28.2	51.76	GHGP	(not reported by company)	N/a	N/a (no %change reported)	N/a (product with insufficient stage-level data)	N/a (product with insufficient stage-level data)	N/a (product with insufficient stage-level data)	N/a (product with insufficient stage-level data)	N/a (product with insufficient stage-level data)	N/a (product with insufficient stage-level data)	None
13889-12-2017	2017	No	Power window switch	Power window switch	OMRON Corporation	Japan	Technology Hardware & Equipment	Electronic Equipment, Instruments & Components	Computer, IT & telecom	0.45	Estimated from external data based on product description	9	20	GHGP	(not reported by company)	N/a	N/a (no %change reported)	N/a (product with insufficient stage-level data)	N/a (product with insufficient stage-level data)	N/a (product with insufficient stage-level data)	N/a (product with insufficient stage-level data)	N/a (product with insufficient stage-level data)	N/a (product with insufficient stage-level data)	None
13889-13-2017	2017	No	Safety controller	Safety controllerDST1	OMRON Corporation	Japan	Technology Hardware & Equipment	Electronic Equipment, Instruments & Components	Computer, IT & telecom	0.42	Estimated from external data based on product description	1.617	3.85	GHGP	(not reported by company)	N/a	N/a (no %change reported)	N/a (product with insufficient stage-level data)	N/a (product with insufficient stage-level data)	N/a (product with insufficient stage-level data)	N/a (product with insufficient stage-level data)	N/a (product with insufficient stage-level data)	N/a (product with insufficient stage-level data)	Total CO2e figure corrected from gram to kg based on consistency with OMRON's other products
13889-14-2017	2017	No	Switch	Limit switch	OMRON Corporation	Japan	Technology Hardware & Equipment	Electronic Equipment, Instruments & Components	Computer, IT & telecom	0.25	Estimated from external data based on product description	0.069	0.28	GHGP	(not reported by company)	N/a	N/a (no %change reported)	N/a (product with insufficient stage-level data)	N/a (product with insufficient stage-level data)	N/a (product with insufficient stage-level data)	N/a (product with insufficient stage-level data)	N/a (product with insufficient stage-level data)	N/a (product with insufficient stage-level data)	None
13889-2-2014	2014	No	Keyless Entry System for Automobiles(Transmitter + Receiver unit)	BLANK	OMRON Corporation	Japan	Technology Hardware & Equipment	Electronic Equipment, Instruments & Components	Computer, IT & telecom	0.112	Estimated from external data based on product description	8.96	80	GHGP	(not reported by company)	N/a	N/a (no previous data available)	N/a (product with insufficient stage-level data)	N/a (product with insufficient stage-level data)	N/a (product with insufficient stage-level data)	N/a (product with insufficient stage-level data)	N/a (product with insufficient stage-level data)	N/a (product with insufficient stage-level data)	None
13889-4-2014	2014	No	Signal Relay Type G6Zk-1F-TR	BLANK	OMRON Corporation	Japan	Technology Hardware & Equipment	Electronic Equipment, Instruments & Components	Computer, IT & telecom	0.0028	Estimated from external data based on product description	0.145	51.79	Not reported	(not reported by company)	N/a	N/a (no %change reported)	N/a (product with insufficient stage-level data)	N/a (product with insufficient stage-level data)	N/a (product with insufficient stage-level data)	N/a (product with insufficient stage-level data)	N/a (product with insufficient stage-level data)	N/a (product with insufficient stage-level data)	None
13889-5-2017	2017	No	Automotive Relay	Automotive Relay G83	OMRON Corporation	Japan	Technology Hardware & Equipment	Electronic Equipment, Instruments & Components	Computer, IT & telecom	0.034	Estimated from external data based on product description	3.3	97.06	GHGP	(not reported by company)	N/a	N/a (no %change reported)	N/a (product with insufficient stage-level data)	N/a (product with insufficient stage-level data)	N/a (product with insufficient stage-level data)	N/a (product with insufficient stage-level data)	N/a (product with insufficient stage-level data)	N/a (product with insufficient stage-level data)	None
13889-6-2017	2017	No	Automotive Relay	G8W Automotive Mini 280 Relay	OMRON Corporation	Japan	Technology Hardware & Equipment	Electronic Equipment, Instruments & Components	Computer, IT & telecom	0.034	Estimated from external data based on product description	1.1	32.35	GHGP	(not reported by company)	N/a	N/a (no %change reported)	N/a (product with insufficient stage-level data)	N/a (product with insufficient stage-level data)	N/a (product with insufficient stage-level data)	N/a (product with insufficient stage-level data)	N/a (product with insufficient stage-level data)	N/a (product with insufficient stage-level data)	None
13889-7-2017	2017	No	Automotive Relay	Power Relay G8HNJ	OMRON Corporation	Japan	Technology Hardware & Equipment	Electronic Equipment, Instruments & Components	Computer, IT & telecom	0.034	Estimated from external data based on product description	0.6	17.65	GHGP	(not reported by company)	N/a	N/a (no %change reported)	N/a (product with insufficient stage-level data)	N/a (product with insufficient stage-level data)	N/a (product with insufficient stage-level data)	N/a (product with insufficient stage-level data)	N/a (product with insufficient stage-level data)	N/a (product with insufficient stage-level data)	None
13889-8-2017	2017	No	Blood Pressure Monitor	Upper arm automatic blood pressure monitor(About 250 grams)	OMRON Corporation	Japan	Technology Hardware & Equipment	Electronic Equipment, Instruments & Components	Computer, IT & telecom	0.25	As per company's submission to CDP	28.2	112.8	GHGP	0.282	Because the amount of emission in a product use stage accounts for the most part, and other influence is difficult to undergo.	Product carbon efficiency changed	N/a (product with insufficient stage-level data)	N/a (product with insufficient stage-level data)	N/a (product with insufficient stage-level data)	N/a (product with insufficient stage-level data)	N/a (product with insufficient stage-level data)	N/a (product with insufficient stage-level data)	None
13889-9-2017	2017	No	ECU	ECU	OMRON Corporation	Japan	Technology Hardware & Equipment	Electronic Equipment, Instruments & Components	Computer, IT & telecom	1.06	Estimated from external data based on product description	7.5	7.08	GHGP	(not reported by company)	N/a	N/a (no %change reported)	N/a (product with insufficient stage-level data)	N/a (product with insufficient stage-level data)	N/a (product with insufficient stage-level data)	N/a (product with insufficient stage-level data)	N/a (product with insufficient stage-level data)	N/a (product with insufficient stage-level data)	None
14021-1-2013	2013	Yes	City gas	The main components of Osaka Gas’s City gas are imported LNG + LPG for calorie adjust use, and so on.	Osaka Gas Co., Ltd.	Japan	Utilities	Gas Utilities	Comm. equipm. & capital goods	1.062	Estimated from external data based on product description	60.58	57.04	Not reported	(not reported by company)	N/a	N/a (no %change reported)	Yes	0.1251	0.0269	0.848	0.0325	(included in downstream but not reported separately)	Streamlined product name/description to be the same across reporting years
14021-1-2015	2015	Yes	City gas	The main components of Osaka Gas’s City gas are imported LNG + LPG for calorie adjust use, and so on.	Osaka Gas Co., Ltd.	Japan	Gas Utilities	Not used for 2015 reporting	Comm. equipm. & capital goods	1.062	Estimated from external data based on product description	60.58	57.04	Not reported	(not reported by company)	N/a	N/a (no %change reported)	Yes	0.1251	0.0269	0.848	0.0325	(included in downstream but not reported separately)	None
14021-1-2016	2016	Yes	City gas	The main components of Osaka Gas’s City gas are imported LNG +LPG for calorie adjust use,and so on.	Osaka Gas Co., Ltd.	Japan	Utilities	Gas Utilities	Comm. equipm. & capital goods	1.062	Estimated from external data based on product description	60.64	57.1	GHGP	-0.023	The latest edition of the survey shows the emission coefficient reduction in production and combustion process of LNG by approx. 2.3%. [...] It is calculated by the LCA method. : LCA “Life Cycle Assessment” : A comprehensive qualification method of survey, analysis, and evaluation of the amount of environmental impacts of products and services. The assessment covers all the related processes from…	Product carbon efficiency changed	No	0.1234	0.0119	0.8648	0.0244	(included in downstream but not reported separately)	Re-ordered text in "explanation for change" for clarity
14605-1-2013	2013	No	Walkers Crisps 32.5 g sold in the United Kingdom	Field not included in 2013 data	PepsiCo, Inc.	USA	Food, Beverage & Tobacco	Beverages	Food & Beverage	0.0325	As per company's submission to CDP	0.08	2.46	GHGP	-0.02	Please note that supplied figures are based on a re-baselined and certified Carbon Footprint with the Carbon Trust reflecting serving size changes. The date of previous figure supplied reflects the date of the previous certification. The reduction in our Walkers Crisps product can be attributed to • Electricity and gas efficiency improvements at site as a result of continued reduction targets at …	Product carbon efficiency changed	N/a (product with insufficient stage-level data)	N/a (product with insufficient stage-level data)	N/a (product with insufficient stage-level data)	N/a (product with insufficient stage-level data)	N/a (product with insufficient stage-level data)	N/a (product with insufficient stage-level data)	Divided total emissions by 1000, because they were given in grams; Streamlined product name to be uniform across years
14605-1-2014	2014	No	Walkers Crisps 32.5 g sold in the United Kingdom	Life Cycle Carbon Footprint for PepsiCo’s Walkers Crisps 32.5 g sold in the United Kingdom.	PepsiCo, Inc.	USA	Food, Beverage & Tobacco	Beverages	Food & Beverage	0.0325	As per company's submission to CDP	0.08	2.46	GHGP	-0.02	Please note that supplied figures are based on a re-baselined and certified Carbon Footprint with the Carbon Trust reflecting serving size changes. The date of previous figure supplied reflects the date of the previous certification. The reduction in our Walkers Crisps product can be attributed to • Electricity and gas efficiency improvements at site as a result of continued reduction targets at …	Product carbon efficiency changed	N/a (product with insufficient stage-level data)	N/a (product with insufficient stage-level data)	N/a (product with insufficient stage-level data)	N/a (product with insufficient stage-level data)	N/a (product with insufficient stage-level data)	N/a (product with insufficient stage-level data)	Divided total emissions by 1000, because they were given in grams; Streamlined product name to be uniform across years
14605-1-2015	2015	No	Walkers Crisps 32.5 g sold in the United Kingdom	Life Cycle Carbon Footprint for PepsiCo’s Walkers Crisps 32.5 g sold in the United Kingdom.	PepsiCo, Inc.	USA	Food & Beverage Processing	Not used for 2015 reporting	Food & Beverage	0.0325	As per company's submission to CDP	0.08	2.46	GHGP	-0.02	Please note that supplied figures are based on a re-baselined and certified Carbon Footprint with the Carbon Trust reflecting serving size changes. The date of previous figure supplied reflects the date of the previous certification. The reduction in our Walkers Crisps product can be attributed to • Electricity and gas efficiency improvements at site as a result of continued reduction targets at …	Product carbon efficiency changed	N/a (product with insufficient stage-level data)	N/a (product with insufficient stage-level data)	N/a (product with insufficient stage-level data)	N/a (product with insufficient stage-level data)	N/a (product with insufficient stage-level data)	N/a (product with insufficient stage-level data)	Divided total emissions by 1000, because they were given in grams; GCIS Sector was not an input option for the 2015 survery, a sector designation was applied by referencing previous year's data; Streamlined product name to be uniform across years
14605-2-2013	2013	No	Walkers Crisps 50g bag sold in the United Kingdom	Field not included in 2013 data	PepsiCo, Inc.	USA	Food, Beverage & Tobacco	Beverages	Food & Beverage	0.05	As per company's submission to CDP	0.12	2.4	GHGP	-0.02	Please note that supplied figures are based on a re-baselined and certified Carbon Footprint with the Carbon Trust. The date of previous figure supplied reflects the date of the previous certification. The reduction in our Walkers Crisps product can be attributed to • Electricity and gas efficiency improvements at site as a result of continued reduction targets at site. • Reduction of fuel consum…	Product carbon efficiency changed	N/a (product with insufficient stage-level data)	N/a (product with insufficient stage-level data)	N/a (product with insufficient stage-level data)	N/a (product with insufficient stage-level data)	N/a (product with insufficient stage-level data)	N/a (product with insufficient stage-level data)	Divided total emissions by 1000, because they were given in grams; Streamlined product name to be uniform across years
14605-2-2014	2014	No	Walkers Crisps 50g bag sold in the United Kingdom	Life Cycle Carbon Footprint for PepsiCo’s Walkers Crisps 50g bag sold in the United Kingdom	PepsiCo, Inc.	USA	Food, Beverage & Tobacco	Beverages	Food & Beverage	0.05	As per company's submission to CDP	0.12	2.4	GHGP	-0.02	Please note that supplied figures are based on a re-baselined and certified Carbon Footprint with the Carbon Trust. The date of previous figure supplied reflects the date of the previous certification. The reduction in our Walkers Crisps product can be attributed to • Electricity and gas efficiency improvements at site as a result of continued reduction targets at site. • Reduction of fuel consum…	Product carbon efficiency changed	N/a (product with insufficient stage-level data)	N/a (product with insufficient stage-level data)	N/a (product with insufficient stage-level data)	N/a (product with insufficient stage-level data)	N/a (product with insufficient stage-level data)	N/a (product with insufficient stage-level data)	Divided total emissions by 1000, because they were given in grams; Streamlined product name to be uniform across years
14605-2-2015	2015	No	Walkers Crisps 50g bag sold in the United Kingdom	Life Cycle Carbon Footprint for PepsiCo’s Walkers Crisps 50g bag sold in the United Kingdom	PepsiCo, Inc.	USA	Food & Beverage Processing	Not used for 2015 reporting	Food & Beverage	0.05	As per company's submission to CDP	0.12	2.4	GHGP	-0.02	Please note that supplied figures are based on a re-baselined and certified Carbon Footprint with the Carbon Trust. The date of previous figure supplied reflects the date of the previous certification. The reduction in our Walkers Crisps product can be attributed to • Electricity and gas efficiency improvements at site as a result of continued reduction targets at site. • Reduction of fuel consum…	Product carbon efficiency changed	N/a (product with insufficient stage-level data)	N/a (product with insufficient stage-level data)	N/a (product with insufficient stage-level data)	N/a (product with insufficient stage-level data)	N/a (product with insufficient stage-level data)	N/a (product with insufficient stage-level data)	Divided total emissions by 1000, because they were given in grams; GCIS Sector was not an input option for the 2015 survery, a sector designation was applied by referencing previous year's data; Streamlined product name to be uniform across years
14605-3-2013	2013	No	Quaker Oats 1Kg box sold in the United Kingdom	Field not included in 2013 data	PepsiCo, Inc.	USA	Food, Beverage & Tobacco	Beverages	Food & Beverage	0.04	As per company's submission to CDP	0.07	1.75	GHGP	-0.12	Please note that 0.07 kg of CO2e reflects a per serving size of 40g. Reduced cooking times prescribed on pack. • Logistics efficiency improvements, notably: reduction of fuel consumption per km travelled (through vehicle replacements and driver efficiency); increased efficiency in network management resulting in less empty return journey’s. This included working with customers; substituting road …	Product carbon efficiency changed	N/a (product with insufficient stage-level data)	N/a (product with insufficient stage-level data)	N/a (product with insufficient stage-level data)	N/a (product with insufficient stage-level data)	N/a (product with insufficient stage-level data)	N/a (product with insufficient stage-level data)	Removed redundant company name from product name; streamlined product name to be same across years
14605-3-2014	2014	No	Quaker Oats 1Kg box sold in the United Kingdom	Life Cycle Carbon Footprint for PepsiCo’s Quaker Oats 1Kg box sold in the United Kingdom.	PepsiCo, Inc.	USA	Food, Beverage & Tobacco	Beverages	Food & Beverage	0.04	As per company's submission to CDP	0.07	1.75	GHGP	-0.12	Please note that 0.07 kg of CO2e reflects a per serving size of 40g. Reduced cooking times prescribed on pack. • Logistics efficiency improvements, notably: reduction of fuel consumption per km travelled (through vehicle replacements and driver efficiency); increased efficiency in network management resulting in less empty return journey’s. This included working with customers; substituting road …	Product carbon efficiency changed	N/a (product with insufficient stage-level data)	N/a (product with insufficient stage-level data)	N/a (product with insufficient stage-level data)	N/a (product with insufficient stage-level data)	N/a (product with insufficient stage-level data)	N/a (product with insufficient stage-level data)	Streamlined product name to be same across years
14605-3-2015	2015	No	Quaker Oats 1Kg box sold in the United Kingdom	Life Cycle Carbon Footprint for PepsiCo’s Quaker Oats 1Kg box sold in the United Kingdom.	PepsiCo, Inc.	USA	Food & Beverage Processing	Not used for 2015 reporting	Food & Beverage	0.04	As per company's submission to CDP	0.07	1.75	GHGP	-0.12	Please note that 0.07 kg of CO2e reflects a per serving size of 40g. Reduced cooking times prescribed on pack. • Logistics efficiency improvements, notably: reduction of fuel consumption per km travelled (through vehicle replacements and driver efficiency); increased efficiency in network management resulting in less empty return journey’s. This included working with customers; substituting road …	Product carbon efficiency changed	N/a (product with insufficient stage-level data)	N/a (product with insufficient stage-level data)	N/a (product with insufficient stage-level data)	N/a (product with insufficient stage-level data)	N/a (product with insufficient stage-level data)	N/a (product with insufficient stage-level data)	Streamlined product name to be same across years
14605-4-2013	2013	No	Quaker Oats So Simple Original and Golden Syrup products	Quaker Oats So Simple Original and Golden Syrup products	PepsiCo, Inc.	USA	Food, Beverage & Tobacco	Beverages	Food & Beverage	0.324	As per company's submission to CDP	0.65	2.01	GHGP	-0.12	Please note the figures reflects a per serving size of 27g or 36g depending on SKU f. Reduced cooking times prescribed on pack. • Logistics efficiency improvements, notably: reduction of fuel consumption per km travelled (through vehicle replacements and driver efficiency); increased efficiency in network management resulting in less empty return journey’s, this included working with customers; s…	Product carbon efficiency changed	N/a (product with insufficient stage-level data)	N/a (product with insufficient stage-level data)	N/a (product with insufficient stage-level data)	N/a (product with insufficient stage-level data)	N/a (product with insufficient stage-level data)	N/a (product with insufficient stage-level data)	Removed redundant company name from product name; streamlined product name to be same across years
14605-4-2014	2014	No	Quaker Oats So Simple Original and Golden Syrup products	Life Cycle Carbon Footprint for PepsiCo’s Quaker Oats So Simple Original & Golden Syrup Products	PepsiCo, Inc.	USA	Food, Beverage & Tobacco	Beverages	Food & Beverage	0.324	As per company's submission to CDP	0.65	2.01	GHGP	-0.12	Please note the figures reflects a per serving size of 27g or 36g depending on SKU f. Reduced cooking times prescribed on pack. • Logistics efficiency improvements, notably: reduction of fuel consumption per km travelled (through vehicle replacements and driver efficiency); increased efficiency in network management resulting in less empty return journey’s, this included working with customers; s…	Product carbon efficiency changed	N/a (product with insufficient stage-level data)	N/a (product with insufficient stage-level data)	N/a (product with insufficient stage-level data)	N/a (product with insufficient stage-level data)	N/a (product with insufficient stage-level data)	N/a (product with insufficient stage-level data)	None
14605-4-2015	2015	No	Quaker Oats So Simple Original and Golden Syrup products	Life Cycle Carbon Footprint for PepsiCo’s Quaker Oats So Simple Original & Golden Syrup Products	PepsiCo, Inc.	USA	Food & Beverage Processing	Not used for 2015 reporting	Food & Beverage	0.324	As per company's submission to CDP	0.65	2.01	GHGP	-0.12	Please note the figures reflects a per serving size of 27g or 36g depending on SKU f. Reduced cooking times prescribed on pack. • Logistics efficiency improvements, notably: reduction of fuel consumption per km travelled (through vehicle replacements and driver efficiency); increased efficiency in network management resulting in less empty return journey’s, this included working with customers; s…	Product carbon efficiency changed	N/a (product with insufficient stage-level data)	N/a (product with insufficient stage-level data)	N/a (product with insufficient stage-level data)	N/a (product with insufficient stage-level data)	N/a (product with insufficient stage-level data)	N/a (product with insufficient stage-level data)	None
14697-1-2013	2013	No	HH DVD	Field not included in 2013 data	Philips & Lite-On Digital Solutions Corp.	Taiwan	Technology Hardware & Equipment	Computers & Peripherals	Computer, IT & telecom	0.0907185	Estimated from external data based on product description	25.5	281.09	Not reported	(not reported by company)	N/a	N/a (no %change reported)	N/a (product with insufficient stage-level data)	N/a (product with insufficient stage-level data)	N/a (product with insufficient stage-level data)	N/a (product with insufficient stage-level data)	N/a (product with insufficient stage-level data)	N/a (product with insufficient stage-level data)	None
149-1-2013	2013	Yes	power supply unit (MF6004-030L)	Field not included in 2013 data	Acbel Polytech Inc	Taiwan	Technology Hardware & Equipment	Computers & Peripherals	Computer, IT & telecom	1.8	Estimated from external data based on product description	244.09	135.61	PAS2050	(not reported by company)	N/a	N/a (no previous data available)	No	0.4369	0.4644	0.0987	0.0987	(included in downstream but not reported separately)	None
15391-1-2013	2013	No	CD-ROM	Field not included in 2013 data	Quanta Storage Inc.	China	Technology Hardware & Equipment	Computers & Peripherals	Computer, IT & telecom	0.0907185	Estimated from external data based on product description	1.62	17.86	Not reported	0.12	N/a	No specific reason reported	N/a (product with insufficient stage-level data)	N/a (product with insufficient stage-level data)	N/a (product with insufficient stage-level data)	N/a (product with insufficient stage-level data)	N/a (product with insufficient stage-level data)	N/a (product with insufficient stage-level data)	None
15391-1-2014	2014	No	CD-ROM	CD-ROM	Quanta Storage Inc.	China	Technology Hardware & Equipment	Computers & Peripherals	Computer, IT & telecom	0.0907185	Estimated from external data based on product description	12	132.28	Not reported	(not reported by company)	N/a	N/a (no %change reported)	N/a (product with insufficient stage-level data)	N/a (product with insufficient stage-level data)	N/a (product with insufficient stage-level data)	N/a (product with insufficient stage-level data)	N/a (product with insufficient stage-level data)	N/a (product with insufficient stage-level data)	None
15398-10-2014	2014	Yes	LED Lighting	Dimensions: 798*225*569mm, Power Consumption: 12W (Max.), Gross weight with packageing: 6.3Kg, Excluded from the study of carbon footprint of product were CD、Manual and Quick Start Guide	Qisda	Taiwan	Technology Hardware & Equipment	Computers & Peripherals	Computer, IT & telecom	6.3	As per company's submission to CDP	33.31	5.29	PAS2050	(not reported by company)	N/a	N/a (no previous data available)	No	0.9838	0.0138	0.0024	0.0024	(included in downstream but not reported separately)	None
15398-11-2014	2014	Yes	Projector	Lamp: UHP-196W MKII, Gross weight with packageing: 2.8Kg, Excluded from the study of carbon footprint of product were CD、Manual and Quick Start Guide	Qisda	Taiwan	Technology Hardware & Equipment	Computers & Peripherals	Computer, IT & telecom	2.8	As per company's submission to CDP	88.96	31.77	PAS2050	(not reported by company)	N/a	N/a (no previous data available)	No	0.877	0.1206	0.0024	0.0024	(included in downstream but not reported separately)	None
15398-1-2013	2013	Yes	19” LCD Monitor Weight: 2.4Kg Diagonal size: 19" Power consumption: <16.25W (on mode), <0.72W (power saving mode), <0.53W (off mode) Excluded from the study of carbon footprint of product were CD、Manual and Quick Start Guide	19” LCD Monitor Weight: 2.4Kg Diagonal size: 19" Power consumption: <16.25W (on mode), <0.72W (power saving mode), <0.53W (off mode) Excluded from the study of carbon footprint of product were CD、Manual and Quick Start Guide	Qisda	Taiwan	Technology Hardware & Equipment	Computers & Peripherals	Computer, IT & telecom	2.4	As per company's submission to CDP	70.02	29.18	PAS2050	(not reported by company)	N/a	N/a (no previous data available)	No	0.984	0.0129	0.0031	0.0031	(included in downstream but not reported separately)	None
15398-12-2014	2014	Yes	Mobile Phone	Screen diagonal size:4.5" gHD, Power Consumption: 2W, Gross weight with packageing: 0.31Kg, Excluded from the study of carbon footprint of product were CD、Manual and Quick Start Guide	Qisda	Taiwan	Technology Hardware & Equipment	Computers & Peripherals	Computer, IT & telecom	0.31	As per company's submission to CDP	19.38	62.52	PAS2050	(not reported by company)	N/a	N/a (no previous data available)	No	0.8818	0.1171	0.001	0.001	(included in downstream but not reported separately)	None
15398-13-2015	2015	Yes	Monitor	24” LCD Monitor, Gross weight with packaging: 7.4 Kg, Screen diagonal size: 24", Power consumption: <40W (on mode), <0.5W (standby mode), <0.3W (off mode), Excluded from the study of carbon footprint of product were CD、Manual and Quick Start Guide	Qisda	Taiwan	Technology Hardware & Equipment	Not used for 2015 reporting	Computer, IT & telecom	7.4	As per company's submission to CDP	66.19	8.94	PAS2050	(not reported by company)	N/a	N/a (no previous data available)	No	0.9721	0.0224	0.0056	0.0056	(included in downstream but not reported separately)	None
15398-13-2016	2016	Yes	Monitor	24” LCD Monitor, Gross weight with packaging: 5.8 Kg, Screen diagonal size: 24", Excluded from the study of carbon footprint of product were CD?Manual and Quick Start Guide	Qisda	Taiwan	Technology Hardware & Equipment	Electronic Equipment, Instruments & Components	Computer, IT & telecom	5.8	As per company's submission to CDP	74.83	12.9	PAS2050	(not reported by company)	N/a	N/a (no previous data available)	No	0.9706	0.0156	0.0138	0.0138	(included in downstream but not reported separately)	None
15398-14-2015	2015	Yes	Projector	Lamp: VIP 190W, Gross weight with packaging: 3.4Kg, Excluded from the study of carbon footprint of product were CD、Manual and Quick Start Guide	Qisda	Taiwan	Technology Hardware & Equipment	Not used for 2015 reporting	Computer, IT & telecom	3.4	As per company's submission to CDP	83.18	24.46	PAS2050	(not reported by company)	N/a	N/a (no previous data available)	No	0.9841	0.0127	0.0031	0.0031	(included in downstream but not reported separately)	None
15398-14-2016	2016	Yes	Projector	Lamp: VIP 240W, Gross weight with packaging: 4.4Kg, Excluded from the study of carbon footprint of product were CD?Manual and Quick Start Guide	Qisda	Taiwan	Technology Hardware & Equipment	Electronic Equipment, Instruments & Components	Computer, IT & telecom	4.4	As per company's submission to CDP	99.68	22.65	PAS2050	(not reported by company)	N/a	N/a (no previous data available)	No	0.9726	0.0241	0.0033	0.0033	(included in downstream but not reported separately)	None
15398-15-2015	2015	Yes	Mobile Phone	Display diagonal size:5" HD, IPS. Battery: 2520mAh, Gross weight with packaging: 0.35Kg, Excluded from the study of carbon footprint of product were CD、Manual and Quick Start Guide	Qisda	Taiwan	Technology Hardware & Equipment	Not used for 2015 reporting	Computer, IT & telecom	0.35	As per company's submission to CDP	53.36	152.46	PAS2050	(not reported by company)	N/a	N/a (no previous data available)	No	0.994	0.0006	0.0054	0.0054	(included in downstream but not reported separately)	None
15398-15-2016	2016	Yes	Mobile Phone	Display diagonal size: 5.2" FHD, IPS. Battery: 2520mAh, Gross weight with packaging: 0.35Kg, Excluded from the study of carbon footprint of product were CD?Manual and Quick Start Guide	Qisda	Taiwan	Technology Hardware & Equipment	Electronic Equipment, Instruments & Components	Computer, IT & telecom	0.35	As per company's submission to CDP	16.21	46.31	PAS2050	(not reported by company)	N/a	N/a (no previous data available)	No	0.9938	0.0043	0.0019	0.0019	(included in downstream but not reported separately)	None
15398-16-2015	2015	Yes	LED Lighting	Dimensions: 90*1500*90mm(W*D*H), LED spec: Nichia 3030 3000~3500K, Power Consumption: 36W (Max.), Gross weight with packaging: 8.2Kg, Excluded from the study of carbon footprint of product were CD、Manual and Quick Start Guide	Qisda	Taiwan	Technology Hardware & Equipment	Not used for 2015 reporting	Computer, IT & telecom	8.2	As per company's submission to CDP	69.12	8.43	PAS2050	(not reported by company)	N/a	N/a (no previous data available)	No	0.8296	0.1688	0.0016	0.0016	(included in downstream but not reported separately)	None
15398-16-2016	2016	Yes	LED Lighting	Dimensions: 590*220*625mm(W*D*H), LED spec: LEXTAR LBL1201 V0 2700K, 5700K, Power Consumption: 18W (Max.), Gross weight with packaging: 5.8Kg, Excluded from the study of carbon footprint of product were CD?Manual and Quick Start Guide	Qisda	Taiwan	Technology Hardware & Equipment	Electronic Equipment, Instruments & Components	Computer, IT & telecom	5.8	As per company's submission to CDP	24.04	4.14	PAS2050	(not reported by company)	N/a	N/a (no previous data available)	No	0.901	0.0957	0.0033	0.0033	(included in downstream but not reported separately)	None
15398-17-2015	2015	Yes	Industrial Solutions	LCD screen diagonal size: 27", Gross weight with packaging: 14.2 Kg, Power consumption: 80W(full load), Excluded from the study of carbon footprint of product were CD、Manual and Quick Start Guide	Qisda	Taiwan	Technology Hardware & Equipment	Not used for 2015 reporting	Computer, IT & telecom	14.2	As per company's submission to CDP	146.41	10.31	PAS2050	(not reported by company)	N/a	N/a (no previous data available)	No	0.9688	0.027	0.0042	0.0042	(included in downstream but not reported separately)	None
15398-18-2016	2016	Yes	Industrial Solutions	LCD screen diagonal size: 475.2mm*267.3mm, Gross weight with packaging: 7 Kg, Power consumption: 64.4W, Excluded from the study of carbon footprint of product were CD?Manual and Quick Start Guide	Qisda	Taiwan	Technology Hardware & Equipment	Electronic Equipment, Instruments & Components	Computer, IT & telecom	7	As per company's submission to CDP	66.16	9.45	PAS2050	(not reported by company)	N/a	N/a (no previous data available)	No	0.8948	0.1002	0.005	0.005	(included in downstream but not reported separately)	None
15398-2-2013	2013	Yes	Projector Weight: 7.5Kg Lamp: 24 pcs laser with phosphor Excluded from the study of carbon footprint of product were CD、Manual and Quick Start Guide.	Projector Weight: 7.5Kg Lamp: 24 pcs laser with phosphor Excluded from the study of carbon footprint of product were CD、Manual and Quick Start Guide.	Qisda	Taiwan	Technology Hardware & Equipment	Computers & Peripherals	Computer, IT & telecom	7.5	As per company's submission to CDP	182.927	24.39	PAS2050	(not reported by company)	N/a	N/a (no previous data available)	No	0.9917	0.0052	0.0031	0.0031	(included in downstream but not reported separately)	None
15398-3-2013	2013	Yes	Mobile phone Weight: 0.11kg Screen Diagonal: 3.7" WVGA (800*480) 16M Color TFT-LCD Power Consumption: Standby time(1300m Ah): Up to 4 hrs depends on real-network Excluded from the study of carbon footprint of product were CD、Manual and Quick Start Guide.	Mobile phone Weight: 0.11kg Screen Diagonal: 3.7" WVGA (800*480) 16M Color TFT-LCD Power Consumption: Standby time(1300m Ah): Up to 4 hrs depends on real-network Excluded from the study of carbon footprint of product were CD、Manual and Quick Start Guide.	Qisda	Taiwan	Technology Hardware & Equipment	Computers & Peripherals	Computer, IT & telecom	0.11	As per company's submission to CDP	18.756	170.51	PAS2050	(not reported by company)	N/a	N/a (no previous data available)	No	0.6915	0.3081	0.0004	0.0004	(included in downstream but not reported separately)	None
15398-4-2013	2013	Yes	Digital Photo Frame Weight: 0.8 kg Diagonal size: 7D Overall Dimension: 238*202*39.7mm Excluded from the study of carbon footprint of product were CD、Manual and Quick Start Guide.	Digital Photo Frame Weight: 0.8 kg Diagonal size: 7D Overall Dimension: 238*202*39.7mm Excluded from the study of carbon footprint of product were CD、Manual and Quick Start Guide.	Qisda	Taiwan	Technology Hardware & Equipment	Computers & Peripherals	Computer, IT & telecom	0.8	As per company's submission to CDP	25.517	31.9	PAS2050	(not reported by company)	N/a	N/a (no previous data available)	No	0.9843	0.0133	0.0024	0.0024	(included in downstream but not reported separately)	None
15398-5-2013	2013	Yes	Scanner Weight: 1.4 kg Power supply: 12V/1.5A Excluded from the study of carbon footprint of product were CD、Manual and Quick Start Guide.	Scanner Weight: 1.4 kg Power supply: 12V/1.5A Excluded from the study of carbon footprint of product were CD、Manual and Quick Start Guide.	Qisda	Taiwan	Technology Hardware & Equipment	Computers & Peripherals	Computer, IT & telecom	1.4	As per company's submission to CDP	20.886	14.92	PAS2050	(not reported by company)	N/a	N/a (no previous data available)	No	0.9547	0.0452	0.0001	0.0001	(included in downstream but not reported separately)	None
15398-6-2014	2014	Yes	Monitor	27” LCD Monitor, Gross weight with packageing: 11 Kg, Diagonal size: 27", Power consumption: <35W (on mode), <0.5W (power saving mode), <0.5W (off mode), Excluded from the study of carbon footprint of product were CD、Manual and Quick Start Guide	Qisda	Taiwan	Technology Hardware & Equipment	Computers & Peripherals	Computer, IT & telecom	11	As per company's submission to CDP	105.56	9.6	PAS2050	(not reported by company)	N/a	N/a (no previous data available)	No	0.9647	0.0301	0.0052	0.0052	(included in downstream but not reported separately)	None
15398-7-2014	2014	Yes	42' Industrial Solutions	LCD screen diagonal size: 41.92", Gross weight with packageing: 23 Kg, Power consumption: 54.85W, Excluded from the study of carbon footprint of product were CD、Manual and Quick Start Guide	Qisda	Taiwan	Technology Hardware & Equipment	Computers & Peripherals	Computer, IT & telecom	23	As per company's submission to CDP	174.46	7.59	PAS2050	(not reported by company)	N/a	N/a (no previous data available)	No	0.9689	0.0171	0.0139	0.0139	(included in downstream but not reported separately)	None
15398-8-2014	2014	Yes	Mobile Infotainment	Overall Dimension: 202mm*122mm*12mm, Gross weight with packageing: 0.7 Kg, Excluded from the study of carbon footprint of product were CD、Manual and Quick Start Guide	Qisda	Taiwan	Technology Hardware & Equipment	Computers & Peripherals	Computer, IT & telecom	0.7	As per company's submission to CDP	25.72	36.74	PAS2050	(not reported by company)	N/a	N/a (no previous data available)	No	0.972	0.026	0.0019	0.0019	(included in downstream but not reported separately)	None
15398-9-2014	2014	Yes	Surveillance Camera & Products	Imaging Device: 1/6.9-inch, Minimum Illumination: 3Lux, Gross weight with packageing: 0.162 Kg, Excluded from the study of carbon footprint of product were CD、Manual and Quick Start Guide	Qisda	Taiwan	Technology Hardware & Equipment	Computers & Peripherals	Computer, IT & telecom	0.162	As per company's submission to CDP	6.13	37.84	PAS2050	(not reported by company)	N/a	N/a (no previous data available)	No	0.9038	0.0881	0.0082	0.0082	(included in downstream but not reported separately)	None
15673-1-2013	2013	Yes	BlackBerry Bold 9900	Field not included in 2013 data	BlackBerry Limited	Canada	Telecommunication Services	Wireless Telecommunication Services	Computer, IT & telecom	0.13	Estimated from external data based on product description	52.2	401.54	ISO	(not reported by company)	N/a	N/a (no %change reported)	Yes	0.4418	0.1685	0.3896	0.0263	0.0136	None
15673-2-2014	2014	Yes	BlackBerry Z10	Touchscreen Smartphone	BlackBerry Limited	Canada	Technology Hardware & Equipment	Communications Equipment	Computer, IT & telecom	0.1375	Estimated from external data based on product description	57.1	415.27	ISO	(not reported by company)	N/a	N/a (no %change reported)	Yes	0.4569	0.1743	0.3688	0.0108	0.0052	None
15673-3-2015	2015	Yes	BlackBerry Passport	Smartphone	BlackBerry Limited	Canada	Technology Hardware & Equipment	Not used for 2015 reporting	Computer, IT & telecom	0.205	Estimated from external data based on product description	65.1	317.56	ISO	(not reported by company)	N/a	N/a (no %change reported)	Yes	0.4373	0.1668	0.3959	0.031	0.0019	None
15673-3-2016	2016	Yes	BlackBerry Passport	Smartphone in a fiber-based package	BlackBerry Limited	Canada	Technology Hardware & Equipment	Electronic Equipment, Instruments & Components	Computer, IT & telecom	0.205	Estimated from external data based on product description	65.1	317.56	ISO	(not reported by company)	N/a	N/a (no %change reported)	Yes	0.4373	0.1668	0.3959	0.031	0.0019	None
15673-4-2016	2016	Yes	BlackBerry Classic	Smartphone in a fiber-based package	BlackBerry Limited	Canada	Technology Hardware & Equipment	Electronic Equipment, Instruments & Components	Computer, IT & telecom	0.178	Estimated from external data based on product description	62.8	352.81	ISO	(not reported by company)	N/a	N/a (no %change reported)	Yes	0.4403	0.1679	0.3917	0.0343	0.0023	None
15673-5-2016	2016	Yes	BlackBerry Priv	Smartphone in a fiber-based package	BlackBerry Limited	Canada	Technology Hardware & Equipment	Electronic Equipment, Instruments & Components	Computer, IT & telecom	0.192	Estimated from external data based on product description	79.9	416.15	ISO	(not reported by company)	N/a	N/a (no %change reported)	Yes	0.4513	0.1721	0.3766	0.0207	0.0018	None
15763-10-2017	2017	Yes	Ricoh SP C352DN	Ricoh SP C352DN is a 30 prints/minute Full color printer with A4/Letter size paper size print and automatic duplex capability. The emissions data of this product is provided as a case example of our entire image solution business products line.	Ricoh Co., Ltd.	Japan	Technology Hardware & Equipment	Electronic Equipment, Instruments & Components	Computer, IT & telecom	33	Estimated from external data based on product description	1640	49.7	ISO	-0.2	% change is based on LCA emissions data value between two products (SP C352DN and its predecessor model, SP C342DN). The emissions data was calculated based on "EcoLeaf" environmental Labeling program, which is based on ISO 14025 Environmental Product Declaration (EPD) standard as third-party Full-LCA certification.These two models are in the same product category (A4/Letter size color printer) a…	Product carbon efficiency changed	No	0.0773	0.0212	0.9015	0.0187	0.0125	None
15763-1-2013	2013	No	Ricoh Aficio MP 6002SP, a Mono-chrome MFP (Multi-function products) products that function as Copier, Network Printer, Scanner, (Facsimile).	Ricoh Aficio MP 6002SP, a Mono-chrome MFP (Multi-function products) products that function as Copier, Network Printer, Scanner, (Facsimile).	Ricoh Co., Ltd.	Japan	Technology Hardware & Equipment	Office Electronics	Computer, IT & telecom	214	Estimated from external data based on product description	2400	11.21	ISO	(not reported by company)	N/a	N/a (no %change reported)	N/a (product with insufficient stage-level data)	N/a (product with insufficient stage-level data)	N/a (product with insufficient stage-level data)	N/a (product with insufficient stage-level data)	N/a (product with insufficient stage-level data)	N/a (product with insufficient stage-level data)	None
15763-2-2013	2013	No	Ricoh Aficio MP C5502G, a Full-color MFP (Multi-function products) products that function as Copier, Network Printer, Scanner, (Facsimile).	Ricoh Aficio MP C5502G, a Full-color MFP (Multi-function products) products that function as Copier, Network Printer, Scanner, (Facsimile).	Ricoh Co., Ltd.	Japan	Technology Hardware & Equipment	Office Electronics	Computer, IT & telecom	130	Estimated from external data based on product description	2100	16.15	Not reported	(not reported by company)	N/a	N/a (no %change reported)	N/a (product with insufficient stage-level data)	N/a (product with insufficient stage-level data)	N/a (product with insufficient stage-level data)	N/a (product with insufficient stage-level data)	N/a (product with insufficient stage-level data)	N/a (product with insufficient stage-level data)	None
15763-3-2013	2013	No	Ricoh Aficio SP 8300DN, a high-speed Mono-chrome Network Printer	Ricoh Aficio SP 8300DN, a high-speed Mono-chrome Network Printer	Ricoh Co., Ltd.	Japan	Technology Hardware & Equipment	Office Electronics	Computer, IT & telecom	73	Estimated from external data based on product description	1297	17.77	Not reported	(not reported by company)	N/a	N/a (no %change reported)	N/a (product with insufficient stage-level data)	N/a (product with insufficient stage-level data)	N/a (product with insufficient stage-level data)	N/a (product with insufficient stage-level data)	N/a (product with insufficient stage-level data)	N/a (product with insufficient stage-level data)	None
15763-4-2013	2013	No	Ricoh Aficio SP C831DN, a high-speed Full-colour Network Printer	Ricoh Aficio SP C831DN, a high-speed Full-colour Network Printer	Ricoh Co., Ltd.	Japan	Technology Hardware & Equipment	Office Electronics	Computer, IT & telecom	97	Estimated from external data based on product description	3210	33.09	Not reported	(not reported by company)	N/a	N/a (no %change reported)	N/a (product with insufficient stage-level data)	N/a (product with insufficient stage-level data)	N/a (product with insufficient stage-level data)	N/a (product with insufficient stage-level data)	N/a (product with insufficient stage-level data)	N/a (product with insufficient stage-level data)	None
15763-5-2013	2013	No	Ricoh Pro C751EX, a Production Printer (Full Color) that is used primarily for high-speed and production type (large print volume) job	Ricoh Pro C751EX, a Production Printer (Full Color) that is used primarily for high-speed and production type (large print volume) job	Ricoh Co., Ltd.	Japan	Technology Hardware & Equipment	Office Electronics	Computer, IT & telecom	550	Estimated from external data based on product description	7368	13.4	Not reported	(not reported by company)	N/a	N/a (no %change reported)	N/a (product with insufficient stage-level data)	N/a (product with insufficient stage-level data)	N/a (product with insufficient stage-level data)	N/a (product with insufficient stage-level data)	N/a (product with insufficient stage-level data)	N/a (product with insufficient stage-level data)	None
15763-6-2014	2014	No	Ricoh MP C5503	Ricoh MP C5503 is a hi-speed color MFP (Multi-function product) with; - Colour output at 55 pages a minute - Single Pass Duplex Feeder - Wide selection of finishing options - SRA3 media handling The emissions data of this product is provided as a case example of our entire image solution business products line which covers 77% of Ricoh's total revenue.	Ricoh Co., Ltd.	Japan	Technology Hardware & Equipment	Office Electronics	Computer, IT & telecom	99.9	Estimated from external data based on product description	1940	19.42	ISO	-0.22	% change is based on TEC (typical weekly electricity consumption) value between MP C5503 and its comparable previous model of three years ago.	Model and/or parameters changed (but not product)	N/a (product with insufficient stage-level data)	N/a (product with insufficient stage-level data)	N/a (product with insufficient stage-level data)	N/a (product with insufficient stage-level data)	N/a (product with insufficient stage-level data)	N/a (product with insufficient stage-level data)	None
15763-7-2014	2014	No	Ricoh MP C8002SP: The product is a high-speed (80 images/minute) color multi-functional product (MFP) and is a major representative of our image solution products business. The lifecycle emissions data of this product is provided as a case example of our entire image solution business products line which covers 77% of Ricoh's total revenue.	BLANK	Ricoh Co., Ltd.	Japan	Technology Hardware & Equipment	Office Electronics	Computer, IT & telecom	241	Estimated from external data based on product description	6140	25.48	Not reported	(not reported by company)	N/a	N/a (no %change reported)	N/a (product with insufficient stage-level data)	N/a (product with insufficient stage-level data)	N/a (product with insufficient stage-level data)	N/a (product with insufficient stage-level data)	N/a (product with insufficient stage-level data)	N/a (product with insufficient stage-level data)	Used SM3.2a name of good/service from SM3.2b; Total emissions set to sum of LCA stage emissions
15763-8-2015	2015	No	Ricoh MP 6054SPG	Ricoh MP 6054SPG is a high-speed color MFP (Multi-function product) with; - Colour output at 60 pages a minute - Single Pass Duplex Feeder - Wide selection of finishing options. The emissions data of this product is provided as a case example of our entire image solution business products line which covers 89% of Ricoh's total revenue.	Ricoh Co., Ltd.	Japan	Technology Hardware & Equipment	Not used for 2015 reporting	Computer, IT & telecom	74	Estimated from external data based on product description	1330	17.97	ISO	-0.31	% change is based on TEC (typical weekly electricity consumption) value between MP 6054SPG and MP C5503, the model we presented as the case example model for the previous year report. These two models are in the same product category (color MFP) and have a comparable spec. (55 print per minute of C5503 compared to 60 print per minute with 6054SPG).	Model and/or parameters changed (but not product)	N/a (product with insufficient stage-level data)	N/a (product with insufficient stage-level data)	N/a (product with insufficient stage-level data)	N/a (product with insufficient stage-level data)	N/a (product with insufficient stage-level data)	N/a (product with insufficient stage-level data)	None
15763-9-2015	2015	No	RICOH Pro C7110S QX100	BLANK	Ricoh Co., Ltd.	Japan	Technology Hardware & Equipment	Not used for 2015 reporting	Computer, IT & telecom	600	Estimated from external data based on product description	8080	13.47	Not reported	(not reported by company)	N/a	N/a (no %change reported)	N/a (product with insufficient stage-level data)	N/a (product with insufficient stage-level data)	N/a (product with insufficient stage-level data)	N/a (product with insufficient stage-level data)	N/a (product with insufficient stage-level data)	N/a (product with insufficient stage-level data)	Used SM3.2a name of good/service from SM3.2b; Total emissions set to sum of LCA stage emissions
16290-1-2013	2013	No	SBS Board	Field not included in 2013 data	Sappi	South Africa	Materials	Paper & Forest Products	Construction & commercial materials	1000	As per company's submission to CDP	968	0.97	Not reported	-0.135	one inportant factor was the better utilisation rate of the equipment.	Product carbon efficiency changed	N/a (product with insufficient stage-level data)	N/a (product with insufficient stage-level data)	N/a (product with insufficient stage-level data)	N/a (product with insufficient stage-level data)	N/a (product with insufficient stage-level data)	N/a (product with insufficient stage-level data)	None
16290-1-2014	2014	Yes	AlgroDesign	SBS Board	Sappi	South Africa	Materials	Paper & Forest Products	Construction & commercial materials	1000	As per company's submission to CDP	1031.6	1.03	Not reported	0.065	Increase mainly due to the increase of the emissions factor for the purchased power (increased 59%)	Product carbon efficiency changed	No	0.3017	0.6983	0	(included in up/downstream but not reported separately)	(included in downstream but not reported separately)	None
16290-2-2013	2013	No	One side coated label paper	Field not included in 2013 data	Sappi	South Africa	Materials	Paper & Forest Products	Construction & commercial materials	1000	As per company's submission to CDP	949	0.95	Not reported	-0.131	N/a	No specific reason reported	N/a (product with insufficient stage-level data)	N/a (product with insufficient stage-level data)	N/a (product with insufficient stage-level data)	N/a (product with insufficient stage-level data)	N/a (product with insufficient stage-level data)	N/a (product with insufficient stage-level data)	None
16290-2-2014	2014	Yes	Parade Prima	One side coated label paper	Sappi	South Africa	Materials	Paper & Forest Products	Construction & commercial materials	1000	As per company's submission to CDP	1042.8	1.04	Not reported	0.098	Increase mainly due to the increase of the emissions factor for the purchased power (increased 59%)	Product carbon efficiency changed	No	0.3092	0.6908	0	(included in up/downstream but not reported separately)	(included in downstream but not reported separately)	None
16290-3-2013	2013	No	Uncoated flexible packaging paper	Field not included in 2013 data	Sappi	South Africa	Materials	Paper & Forest Products	Construction & commercial materials	1000	As per company's submission to CDP	1033	1.03	Not reported	-0.124	N/a	No specific reason reported	N/a (product with insufficient stage-level data)	N/a (product with insufficient stage-level data)	N/a (product with insufficient stage-level data)	N/a (product with insufficient stage-level data)	N/a (product with insufficient stage-level data)	N/a (product with insufficient stage-level data)	None
16290-3-2014	2014	Yes	Leine Mühle, Leine Silk	Uncoated flexible packaging paper	Sappi	South Africa	Materials	Paper & Forest Products	Construction & commercial materials	1000	As per company's submission to CDP	1060.9	1.06	Not reported	0.026	Increase mainly due to the increase of the emissions factor for the purchased power (increased 59%)	Product carbon efficiency changed	No	0.321	0.679	0	(included in up/downstream but not reported separately)	(included in downstream but not reported separately)	None
16290-4-2013	2013	No	One side coated flexible packaging paper	Field not included in 2013 data	Sappi	South Africa	Materials	Paper & Forest Products	Construction & commercial materials	1000	As per company's submission to CDP	973	0.97	Not reported	-0.137	N/a	No specific reason reported	N/a (product with insufficient stage-level data)	N/a (product with insufficient stage-level data)	N/a (product with insufficient stage-level data)	N/a (product with insufficient stage-level data)	N/a (product with insufficient stage-level data)	N/a (product with insufficient stage-level data)	None
16290-4-2014	2014	Yes	Algro Helix	One side coated flexible packaging paper	Sappi	South Africa	Materials	Paper & Forest Products	Construction & commercial materials	1000	As per company's submission to CDP	1082.6	1.08	Not reported	0.068	Increase mainly due to the increase of the emissions factor for the purchased power (increased 59%)	Product carbon efficiency changed	No	0.3346	0.6654	0	(included in up/downstream but not reported separately)	(included in downstream but not reported separately)	None
16423-1-2013	2013	Yes	Acti9 – Residual current circuit breaker – iID K. The main function of the iID K product range is to ensure protection of people against electric shocks. PEP of this product is available here: http://planet.schneider-electric.com/C12577A200268439/all/14AA652B755F340C852577F3006F06D0/$File/envpep100201en.pdf	Acti9 – Residual current circuit breaker – iID K. The main function of the iID K product range is to ensure protection of people against electric shocks. PEP of this product is available here: http://planet.schneider-electric.com/C12577A200268439/all/14AA652B755F340C852577F3006F06D0/$File/envpep100201en.pdf	Schneider Electric	France	Capital Goods	Electrical Equipment	Comm. equipm. & capital goods	0.21	Estimated from external data based on product description	19.1	90.95	ISO	(not reported by company)	N/a	N/a (no %change reported)	Yes	0.0668	0.0144	0.9188	0.0016	(included in downstream but not reported separately)	Streamlined product description
16423-1-2014	2014	Yes	ACTI9 IID K 2P 40A 30MA AC-TYPE RESIDUAL CURRENT CIRCUIT BREAKER	The data provided in this question is an example for a product which possesses a Product Environmental Profile: Acti9 – Residual current circuit breaker – ilD K. The main function of the ilD K product range is to ensure protection of people against electric shocks. PEP of this product is available here: http://www2.schneider-electric.com/sites/corporate/en/products-services/green-premium/check-a-…	Schneider Electric	France	Capital Goods	Electrical Equipment	Comm. equipm. & capital goods	0.21	Estimated from external data based on product description	19.1	90.95	ISO	(not reported by company)	N/a	N/a (no %change reported)	Yes	0.0668	0.0144	0.9188	0.0016	(included in downstream but not reported separately)	None
16423-1-2015	2015	Yes	ACTI9 IID K 2P 40A 30MA AC-TYPE RESIDUAL CURRENT CIRCUIT BREAKER	The data provided in this question is an example for a product which possesses a Product Environmental Profile: Acti9 – Residual current circuit breaker – ilD K. The main function of the ilD K product range is to ensure protection of people against electric shocks. PEP of this product is available here: http://www2.schneider-electric.com/sites/corporate/en/products-services/green-premium/check-a-…	Schneider Electric	France	Electrical Equipment and Machinery	Not used for 2015 reporting	Comm. equipm. & capital goods	0.21	Estimated from external data based on product description	19.1	90.95	ISO	(not reported by company)	N/a	N/a (no %change reported)	Yes	0.0668	0.0144	0.9188	0.0016	(included in downstream but not reported separately)	None
16423-2-2016	2016	Yes	ACTI9 IID K 2P 40A 30MA AC-TYPE RESIDUAL CURRENT CIRCUIT BREAKER	The data provided in this question is an example for a product which possesses a Product Environmental Profile: Acti9 – Residual current circuit breaker – ilD K. The main function of the ilD K product range is to ensure protection of people against electric shocks. PEP of this product is available here: https://www.reach.schneider-electric.com/CheckProduct.aspx -> checking reference "A9R50240".	Schneider Electric	France	Capital Goods	Electrical Equipment	Comm. equipm. & capital goods	0.21	Estimated from external data based on product description	61.23	291.57	ISO	(not reported by company)	N/a	N/a (no %change reported)	Yes	0.0192	0.0041	0.9766	0.0008	0.002	None
17280-1-2013	2013	Yes	Corrugated box	Field not included in 2013 data	Smurfit Kappa Group PLC	Ireland	Materials	Containers & Packaging	Packaging for consumer goods	1000	As per company's submission to CDP	746	0.75	FEFCO	-0.05	update of database	Model and/or parameters changed (but not product)	Yes	0.8701	0.1299	0	(included in up/downstream but not reported separately)	(included in downstream but not reported separately)	None
17280-1-2014	2014	Yes	Corrugated Box	Production of corrugated box (including production of raw materials used, fuels consumption, electricity consumption, transport of raw materials)	Smurfit Kappa Group PLC	Ireland	Materials	Containers & Packaging	Packaging for consumer goods	1000	As per company's submission to CDP	746	0.75	PAS2050	(not reported by company)	N/a	N/a (no %change reported)	Yes	0.8701	0.1299	0	(included in up/downstream but not reported separately)	(included in downstream but not reported separately)	None
17280-1-2015	2015	Yes	Corrugated box	Production of corrugated box, including production of raw materials, fuel consumption, electricity consumption and transport of raw materials	Smurfit Kappa Group PLC	Ireland	Containers & Packaging	Not used for 2015 reporting	Packaging for consumer goods	1000	As per company's submission to CDP	746	0.75	PAS2050	(not reported by company)	N/a	N/a (no %change reported)	Yes	0.8701	0.1299	0	(included in up/downstream but not reported separately)	(included in downstream but not reported separately)	None
17280-2-2013	2013	Yes	Board packaging	Field not included in 2013 data	Smurfit Kappa Group PLC	Ireland	Materials	Containers & Packaging	Packaging for consumer goods	1000	As per company's submission to CDP	964	0.96	PAS2050	(not reported by company)	N/a	N/a (no %change reported)	Yes	0.8701	0.1299	0	(included in up/downstream but not reported separately)	(included in downstream but not reported separately)	None
17280-2-2014	2014	Yes	Solid Board	Production of solid board packaging (including production of raw materials used, fuels consumption, electricity consumption, transport of raw materials)	Smurfit Kappa Group PLC	Ireland	Materials	Containers & Packaging	Packaging for consumer goods	1000	As per company's submission to CDP	964	0.96	PAS2050	(not reported by company)	N/a	N/a (no %change reported)	Yes	0.8701	0.1299	0	(included in up/downstream but not reported separately)	(included in downstream but not reported separately)	None
17280-2-2015	2015	Yes	Solid Board	Production of solid board for packaging, including production of raw materials, fuel consumption, electricity consumption and transport of raw materials	Smurfit Kappa Group PLC	Ireland	Containers & Packaging	Not used for 2015 reporting	Packaging for consumer goods	1000	As per company's submission to CDP	964	0.96	PAS2050	(not reported by company)	N/a	N/a (no %change reported)	Yes	0.8701	0.1299	0	(included in up/downstream but not reported separately)	(included in downstream but not reported separately)	None
17296-1-2014	2014	Yes	Sodium Carbonate	Soda Ash Dense is the grade for glass manufacture Soda Ash Light for detergent and chemical applications.	Solvay S.A.	Belgium	Materials	Chemicals	Chemicals	1	As per company's submission to CDP	1.32	1.32	GHGP	(not reported by company)	N/a	N/a (no %change reported)	No	0.0152	0.9848	0	(included in up/downstream but not reported separately)	(included in downstream but not reported separately)	None
17296-2-2014	2014	Yes	Sodium Bicarbonate	Sodium bicarbonate serves primarily the food and feed markets and the health sector, and is also used to neutralize acid flue gases	Solvay S.A.	Belgium	Materials	Chemicals	Chemicals	1	As per company's submission to CDP	1.1	1.1	GHGP	(not reported by company)	N/a	N/a (no %change reported)	No	0.0091	0.9909	0	(included in up/downstream but not reported separately)	(included in downstream but not reported separately)	None
17296-2-2015	2015	Yes	Sodium Bicarbonate	Sodium bicarbonate serves primarily the food and feed markets and the health sector, and is also used to neutralize acid flue gases	Solvay S.A.	Belgium	Chemicals	Not used for 2015 reporting	Chemicals	1	As per company's submission to CDP	1.01	1.01	GHGP	0.08	GHG Protocol Product Accounting & Reporting Standard	Model and/or parameters changed (but not product)	No	0.099	0.901	0	(included in up/downstream but not reported separately)	(included in downstream but not reported separately)	Changed "Methods" to GHGP, as per company's other disclosures
17296-2-2016	2016	No	Sodium Bicarbonate	Sodium bicarbonate serves primarily the food and feed markets and the health sector, and is also used to neutralize acid flue gases	Solvay S.A.	Belgium	Materials	Chemicals	Chemicals	1	As per company's submission to CDP	1.01	1.01	ISO	(not reported by company)	N/a	N/a (no %change reported)	N/a (product with insufficient stage-level data)	N/a (product with insufficient stage-level data)	N/a (product with insufficient stage-level data)	N/a (product with insufficient stage-level data)	N/a (product with insufficient stage-level data)	N/a (product with insufficient stage-level data)	None
17296-3-2015	2015	Yes	Dense Sodium Carbonate	Soda Ash Dense is the grade for glass manufacture	Solvay S.A.	Belgium	Chemicals	Not used for 2015 reporting	Chemicals	1	As per company's submission to CDP	1.29	1.29	GHGP	0.02	Recalculation has been done with Simapro V8.0 and Ecoinvent V2.2 and V3	Model and/or parameters changed (but not product)	No	0.1085	0.8915	0	(included in up/downstream but not reported separately)	(included in downstream but not reported separately)	None
17296-3-2016	2016	No	Dense Sodium Carbonate	Soda Ash Dense is the grade for glass manufacture	Solvay S.A.	Belgium	Materials	Chemicals	Chemicals	1	As per company's submission to CDP	1.29	1.29	ISO	(not reported by company)	N/a	N/a (no %change reported)	N/a (product with insufficient stage-level data)	N/a (product with insufficient stage-level data)	N/a (product with insufficient stage-level data)	N/a (product with insufficient stage-level data)	N/a (product with insufficient stage-level data)	N/a (product with insufficient stage-level data)	None
17296-4-2015	2015	Yes	Light Sodium Carbonate	Soda Ash Light for detergent and chemical applications.	Solvay S.A.	Belgium	Chemicals	Not used for 2015 reporting	Chemicals	1	As per company's submission to CDP	1.19	1.19	GHGP	(not reported by company)	N/a	N/a (no %change reported)	No	0.1092	0.8908	0	(included in up/downstream but not reported separately)	(included in downstream but not reported separately)	None
17296-4-2016	2016	No	Light Sodium Carbonate	Soda Ash Light for detergent and chemical applications.	Solvay S.A.	Belgium	Materials	Chemicals	Chemicals	1	As per company's submission to CDP	1.19	1.19	ISO	(not reported by company)	N/a	N/a (no %change reported)	N/a (product with insufficient stage-level data)	N/a (product with insufficient stage-level data)	N/a (product with insufficient stage-level data)	N/a (product with insufficient stage-level data)	N/a (product with insufficient stage-level data)	N/a (product with insufficient stage-level data)	None
17659-1-2014	2014	Yes	Staples Sustainable Earth 12A toner cartridge	The Sustainable Earth by Staples™ 12A toner is the remanufactured toner cartridge counterpart to the Hewlett Packard Company LaserJet Q2612A (12A) toner cartridge. A toner cartridge is a consumable component of a laser printer. The toner cartridge contains the toner, which is a fine, dry powder mixture that makes the actual image on the paper. The toner is transferred to paper via an electrostati…	Staples, Inc.	USA	Retailing	Specialty Retail	Home durables, textiles, & equipment	0.8172	Estimated from external data based on product description	2.526	3.09	ISO	(not reported by company)	N/a	N/a (no previous data available)	No	0.7185	0.0762	0.2053	0.1746	0.0307	None
17659-1-2015	2015	Yes	Staples Sustainable Earth 12A toner cartridge	The Sustainable Earth by Staples™ 12A toner is the remanufactured toner cartridge counterpart to the Hewlett Packard Company LaserJet Q2612A (12A) toner cartridge. A toner cartridge is a consumable component of a laser printer. The toner cartridge contains the toner, which is a fine, dry powder mixture that makes the actual image on the paper. The toner is transferred to paper via an electrostati…	Staples, Inc.	USA	Retailing	Not used for 2015 reporting	Home durables, textiles, & equipment	0.8172	Estimated from external data based on product description	2.526	3.09	ISO	(not reported by company)	N/a	N/a (no previous data available)	No	0.7185	0.0762	0.2053	0.1746	0.0307	None
17659-2-2014	2014	Yes	Staples Sustainable Earth 38A toner cartridge	The Sustainable Earth by Staples™ 12A toner is the remanufactured toner cartridge counterpart to the Hewlett Packard Company LaserJet Q1338A (38A) toner cartridge. A toner cartridge is a consumable component of a laser printer. The toner cartridge contains the toner, which is a fine, dry powder mixture that makes the actual image on the paper. The toner is transferred to paper via an electrostati…	Staples, Inc.	USA	Retailing	Specialty Retail	Home durables, textiles, & equipment	0.8172	Estimated from external data based on product description	8.38	10.25	ISO	(not reported by company)	N/a	N/a (no previous data available)	No	0.7845	0.0526	0.1629	0.1473	0.0155	None
17659-2-2015	2015	Yes	Staples Sustainable Earth 38A toner cartridge	The Sustainable Earth by Staples™ 12A toner is the remanufactured toner cartridge counterpart to the Hewlett Packard Company LaserJet Q1338A (38A) toner cartridge. A toner cartridge is a consumable component of a laser printer. The toner cartridge contains the toner, which is a fine, dry powder mixture that makes the actual image on the paper. The toner is transferred to paper via an electrostati…	Staples, Inc.	USA	Retailing	Not used for 2015 reporting	Home durables, textiles, & equipment	0.8172	Estimated from external data based on product description	8.38	10.25	ISO	(not reported by company)	N/a	N/a (no previous data available)	No	0.7845	0.0526	0.1629	0.1473	0.0155	None
17673-1-2015	2015	No	D21710 Type 5 Corded Power Drill	D21710 Type 5 Corded Power Drill	Stanley Black & Decker, Inc.	USA	Electrical Equipment and Machinery	Not used for 2015 reporting	Comm. equipm. & capital goods	1.82	Estimated from external data based on product description	55.67	30.59	Not reported	(not reported by company)	N/a	N/a (no %change reported)	N/a (product with insufficient stage-level data)	N/a (product with insufficient stage-level data)	N/a (product with insufficient stage-level data)	N/a (product with insufficient stage-level data)	N/a (product with insufficient stage-level data)	N/a (product with insufficient stage-level data)	None
17673-1-2016	2016	No	D21710 Type 5 Corded Power Drill	D21710 Type 5 Corded Power Drill	Stanley Black & Decker, Inc.	USA	Capital Goods	Electrical Equipment	Comm. equipm. & capital goods	1.82	Estimated from external data based on product description	55.67	30.59	Not reported	(not reported by company)	N/a	N/a (no %change reported)	N/a (product with insufficient stage-level data)	N/a (product with insufficient stage-level data)	N/a (product with insufficient stage-level data)	N/a (product with insufficient stage-level data)	N/a (product with insufficient stage-level data)	N/a (product with insufficient stage-level data)	None
17673-2-2015	2015	No	DC988 Type 11 Cordless Power Drill equipment with rechargeable NiCd batteries	DC988 Type 11 Corded Power Drill equipment with rechargeable NiCd batteries	Stanley Black & Decker, Inc.	USA	Electrical Equipment and Machinery	Not used for 2015 reporting	Comm. equipm. & capital goods	2.7	Estimated from external data based on product description	88.13	32.64	Not reported	(not reported by company)	N/a	N/a (no %change reported)	N/a (product with insufficient stage-level data)	N/a (product with insufficient stage-level data)	N/a (product with insufficient stage-level data)	N/a (product with insufficient stage-level data)	N/a (product with insufficient stage-level data)	N/a (product with insufficient stage-level data)	None
17673-2-2016	2016	No	Cordless Power Drill	DC988 Type 11 Cordless Power Drill equipment with rechargeable NiCd batteries	Stanley Black & Decker, Inc.	USA	Capital Goods	Electrical Equipment	Comm. equipm. & capital goods	2.7	Estimated from external data based on product description	88.13	32.64	Not reported	(not reported by company)	N/a	N/a (no %change reported)	N/a (product with insufficient stage-level data)	N/a (product with insufficient stage-level data)	N/a (product with insufficient stage-level data)	N/a (product with insufficient stage-level data)	N/a (product with insufficient stage-level data)	N/a (product with insufficient stage-level data)	Re-arranged product name/detail
17673-3-2016	2016	Yes	33-725 Tape measure family	FatMax 25 foot tape measure	Stanley Black & Decker, Inc.	USA	Capital Goods	Electrical Equipment	Comm. equipm. & capital goods	0.5	Estimated from external data based on product description	2.15	4.3	Traci 2.1	(not reported by company)	N/a	N/a (no %change reported)	Yes	0.7819	0.1684	0.0497	0.0256	0.0242	None
17788-10-2016	2016	No	B-Free small cube (European supply chain)	B-Free range welcomes varied work postures -reading, reclining, or leaning in to a conversation. From focused individual work to a casual meeting, B-Free provides thoughtful, comfortable support. Small cube allows nearby informal seating during the work day.The model chosen for analysis is the most representative one (reference N3L C00 010)from the B-Free range.	Steelcase	USA	Commercial & Professional Services	Commercial Services & Supplies	Home durables, textiles, & equipment	13.05	Estimated from external data based on product description	23	1.76	ISO	(not reported by company)	N/a	N/a (no %change reported)	N/a (product with insufficient stage-level data)	N/a (product with insufficient stage-level data)	N/a (product with insufficient stage-level data)	N/a (product with insufficient stage-level data)	N/a (product with insufficient stage-level data)	N/a (product with insufficient stage-level data)	None
17788-11-2016	2016	No	B-Free Table (European supply chain)	B-Free range welcomes varied work postures - reading, reclining, or leaning in to a conversation. From focused individual work to a casual meeting, B-Free provides thoughtful, comfortable support. The model chosen for analysis is the most representative one (reference N3L TW0 220) from the B-Free range.	Steelcase	USA	Commercial & Professional Services	Commercial Services & Supplies	Home durables, textiles, & equipment	51.7	Estimated from external data based on product description	150	2.9	ISO	(not reported by company)	N/a	N/a (no %change reported)	N/a (product with insufficient stage-level data)	N/a (product with insufficient stage-level data)	N/a (product with insufficient stage-level data)	N/a (product with insufficient stage-level data)	N/a (product with insufficient stage-level data)	N/a (product with insufficient stage-level data)	None
17788-1-2013	2013	No	Let’s B task chair	Let’s B task chair range offers two versions : Let’s B mid backrest and Let’s B high backrest. The range is designed to provide three major benefits: “comfort”, “intuitivity” and “personalization”. The model chosen for analysis is the most frequently ordered one (reference 469 IM 060) from the Let’s B mid backrest range. Standard features on this model include: - Seat height adjustment - Seat dep…	Steelcase	USA	Commercial & Professional Services	Commercial Services & Supplies	Home durables, textiles, & equipment	19.773	Estimated from external data based on product description	120	6.07	ILCD Handbook	(not reported by company)	N/a	N/a (no previous data available)	N/a (product with insufficient stage-level data)	N/a (product with insufficient stage-level data)	N/a (product with insufficient stage-level data)	N/a (product with insufficient stage-level data)	N/a (product with insufficient stage-level data)	N/a (product with insufficient stage-level data)	None
17788-1-2014	2014	No	Let’s B task chair	Let’s B task chair range offers two versions : Let’s B mid backrest and Let’s B high backrest. The range is designed to provide three major benefits: “comfort”, “intuitivity” and “personalization”. The model chosen for analysis is the most frequently ordered one (reference 469 IM 060) from the Let’s B mid backrest range. Standard features on this model include: - Seat height adjustment - Seat dep…	Steelcase	USA	Commercial & Professional Services	Commercial Services & Supplies	Home durables, textiles, & equipment	19.773	Estimated from external data based on product description	120	6.07	ILCD Handbook	(not reported by company)	N/a	N/a (no %change reported)	N/a (product with insufficient stage-level data)	N/a (product with insufficient stage-level data)	N/a (product with insufficient stage-level data)	N/a (product with insufficient stage-level data)	N/a (product with insufficient stage-level data)	N/a (product with insufficient stage-level data)	None
17788-12-2016	2016	No	Eastside (European supply chain)	Eastside is a stackable visitor chair, with no sharp edges. It is easy to reconfigure – ideal for conferencing, impromptu meeting and teaming tasks. As extra options, it can have armrests, a writing tablet and castors.The model chosen for analysis is the most frequently ordered one (reference 412 450 MH) from the Eastside range.	Steelcase	USA	Commercial & Professional Services	Commercial Services & Supplies	Home durables, textiles, & equipment	6.165	Estimated from external data based on product description	29	4.7	ISO	(not reported by company)	N/a	N/a (no %change reported)	N/a (product with insufficient stage-level data)	N/a (product with insufficient stage-level data)	N/a (product with insufficient stage-level data)	N/a (product with insufficient stage-level data)	N/a (product with insufficient stage-level data)	N/a (product with insufficient stage-level data)	None
17788-13-2016	2016	No	Flip Top Twin (European supply chain)	FlipTop Twin is a clever and flexible table for meeting or training rooms. It is very intuitive: the top can be flipped from both sides, to both sides. Once the top is flipped, the tables can be stored in a space saving way. The model chosen for analysis is the most frequently ordered one (reference W4D1C600) from the FlipTop Twin range.	Steelcase	USA	Commercial & Professional Services	Commercial Services & Supplies	Home durables, textiles, & equipment	32.916	Estimated from external data based on product description	94	2.86	ISO	(not reported by company)	N/a	N/a (no %change reported)	N/a (product with insufficient stage-level data)	N/a (product with insufficient stage-level data)	N/a (product with insufficient stage-level data)	N/a (product with insufficient stage-level data)	N/a (product with insufficient stage-level data)	N/a (product with insufficient stage-level data)	None
17788-16-2016	2016	No	FrameOne Bench (European supply chain)	FrameOne Bench is a workstation with light and refined aesthetic. The same product line allows to create differentiated bench settings supporting more effectively the ways users work: - it offers an integrated sliding top. - it can be associated to work tools, lighting, screens and technology. - it features Bench applications with supporting storage - it provides efficient cable management soluti…	Steelcase	USA	Commercial & Professional Services	Commercial Services & Supplies	Home durables, textiles, & equipment	154.804	Estimated from external data based on product description	380	2.45	ISO	(not reported by company)	N/a	N/a (no %change reported)	N/a (product with insufficient stage-level data)	N/a (product with insufficient stage-level data)	N/a (product with insufficient stage-level data)	N/a (product with insufficient stage-level data)	N/a (product with insufficient stage-level data)	N/a (product with insufficient stage-level data)	None
17788-17-2016	2016	No	Fusion (European supply chain)	Fusion is a desking family comprising work surfaces, storage, desk organization and cable management. Fusion is a platform system that structures the whole office space, no matter what work styles are needed. Fusion is flexible and can be assembled and reconfigured quickly. Its consolidated individual work spaces encourage collaborative working.The model chosen for analysis is the most frequently…	Steelcase	USA	Commercial & Professional Services	Commercial Services & Supplies	Home durables, textiles, & equipment	35.331	Estimated from external data based on product description	71.8	2.03	ISO	(not reported by company)	N/a	N/a (no %change reported)	N/a (product with insufficient stage-level data)	N/a (product with insufficient stage-level data)	N/a (product with insufficient stage-level data)	N/a (product with insufficient stage-level data)	N/a (product with insufficient stage-level data)	N/a (product with insufficient stage-level data)	None
17788-18-2016	2016	No	Gesture (European supply chain)	Gesture is the first chair designed to support our interactions with today’stechnologies. Inspired by the human body. Created for the way we work today. Gesture has a synchronized system moving with each user to provide continuous and persistent support, offers unique arms which move like the human arm, allowing users to be supported in any position, possesses a seat that brings comfort all the w…	Steelcase	USA	Commercial & Professional Services	Commercial Services & Supplies	Home durables, textiles, & equipment	35.38	Estimated from external data based on product description	170	4.8	ISO	(not reported by company)	N/a	N/a (no %change reported)	N/a (product with insufficient stage-level data)	N/a (product with insufficient stage-level data)	N/a (product with insufficient stage-level data)	N/a (product with insufficient stage-level data)	N/a (product with insufficient stage-level data)	N/a (product with insufficient stage-level data)	None
17788-19-2016	2016	No	Gesture (North American supply chain)	Gesture is is the first chair designed to support our interactions with today’s technologies. Inspired by the human body. Created for the way we work today. Gesture has a synchronized system moving with each user to provide continuous and persistent support, offers unique arms which move like the human arm, allowing users to be supported in any position, possesses a seat that brings comfort all t…	Steelcase	USA	Commercial & Professional Services	Commercial Services & Supplies	Home durables, textiles, & equipment	35.38	Estimated from external data based on product description	180	5.09	ISO	(not reported by company)	N/a	N/a (no %change reported)	N/a (product with insufficient stage-level data)	N/a (product with insufficient stage-level data)	N/a (product with insufficient stage-level data)	N/a (product with insufficient stage-level data)	N/a (product with insufficient stage-level data)	N/a (product with insufficient stage-level data)	None
17788-20-2016	2016	No	Implicit (European supply chain)	Implicit is the new generation of personal storage which respond to all storage needs! The materials (steel, melamine and veneer) of the carcass, the top and the fronts can be chosen and mixed together in the Standard and Premium version. Mobile pedestals provide flexibility, juxtaposed pedestals create an extension of the worksurface and supporting replaces a leg of the desk. The model chosen fo…	Steelcase	USA	Commercial & Professional Services	Commercial Services & Supplies	Home durables, textiles, & equipment	35.298	Estimated from external data based on product description	98	2.78	ISO	(not reported by company)	N/a	N/a (no %change reported)	N/a (product with insufficient stage-level data)	N/a (product with insufficient stage-level data)	N/a (product with insufficient stage-level data)	N/a (product with insufficient stage-level data)	N/a (product with insufficient stage-level data)	N/a (product with insufficient stage-level data)	None
17788-21-2016	2016	No	Kalidro (European supply chain)	Simplicity and intelligence is the success of Kalidro. The 4 leg desk system offers a complete range that is easy to install and to configure. The comfortable height adjustment and the smart cable management fulfill customers’ demands.The model chosen for analysis is the most popular model (reference W3812700).	Steelcase	USA	Commercial & Professional Services	Commercial Services & Supplies	Home durables, textiles, & equipment	37	Estimated from external data based on product description	51.5	1.39	ISO	(not reported by company)	N/a	N/a (no %change reported)	N/a (product with insufficient stage-level data)	N/a (product with insufficient stage-level data)	N/a (product with insufficient stage-level data)	N/a (product with insufficient stage-level data)	N/a (product with insufficient stage-level data)	N/a (product with insufficient stage-level data)	None
17788-2-2013	2013	No	The Activa desks are highly ergonomic and offer different height adjustable versions in a single design. Its modular construction allows very easy assembly and reconfiguration. The model chosen for analysis is the most frequently ordered one (reference W6412700) from the Activa Telescopic range. Standard features on this model include: - Top dimensions: 1600 mm x 800 mm - Melamine top, Snow WY - …	The Activa desks are highly ergonomic and offer different height adjustable versions in a single design. Its modular construction allows very easy assembly and reconfiguration. The model chosen for analysis is the most frequently ordered one (reference W6412700) from the Activa Telescopic range. Standard features on this model include: - Top dimensions: 1600 mm x 800 mm - Melamine top, Snow WY - …	Steelcase	USA	Commercial & Professional Services	Commercial Services & Supplies	Home durables, textiles, & equipment	44.706	Estimated from external data based on product description	160	3.58	ILCD Handbook	(not reported by company)	N/a	N/a (no previous data available)	N/a (product with insufficient stage-level data)	N/a (product with insufficient stage-level data)	N/a (product with insufficient stage-level data)	N/a (product with insufficient stage-level data)	N/a (product with insufficient stage-level data)	N/a (product with insufficient stage-level data)	None
17788-2-2014	2014	No	Activa desk	The Activa desks are highly ergonomic and offer different height adjustable versions in a single design. Its modular construction allows very easy assembly and reconfiguration. The model chosen for analysis is the most frequently ordered one (reference W6412700) from the Activa Telescopic range. Standard features on this model include: - Top dimensions: 1600 mm x 800 mm - Melamine top, Snow WY - …	Steelcase	USA	Commercial & Professional Services	Commercial Services & Supplies	Home durables, textiles, & equipment	44.706	Estimated from external data based on product description	160	3.58	ILCD Handbook	(not reported by company)	N/a	N/a (no %change reported)	N/a (product with insufficient stage-level data)	N/a (product with insufficient stage-level data)	N/a (product with insufficient stage-level data)	N/a (product with insufficient stage-level data)	N/a (product with insufficient stage-level data)	N/a (product with insufficient stage-level data)	None
17788-22-2016	2016	No	Leap (European supply chain)	The Leap office chair is our most ergonomic chair. User tests show it reduces lower back pain, discomfort and musculo-skeletal disorders. That means it will increase your productivity by allowing you to sit more comfortably for longer. It’s all thanks to the Leap chair's advanced design with innovative features such as a flexible backrest, separate upper and lower back controls and a dynamic seat…	Steelcase	USA	Commercial & Professional Services	Commercial Services & Supplies	Home durables, textiles, & equipment	26.183	Estimated from external data based on product description	87.8	3.35	ISO	(not reported by company)	N/a	N/a (no %change reported)	N/a (product with insufficient stage-level data)	N/a (product with insufficient stage-level data)	N/a (product with insufficient stage-level data)	N/a (product with insufficient stage-level data)	N/a (product with insufficient stage-level data)	N/a (product with insufficient stage-level data)	None
17788-23-2016	2016	No	Let's B (European supply chain)	Let’s B task chair range offers two versions: Let’s B mid backrest and Let’s B high backrest. The range is designed to provide three major benefits: “comfort”, “intuitivity” and “personalization”. The model chosen for analysis is the most frequently ordered one(reference 469 IM 060) from the Let’s B mid backrest range.	Steelcase	USA	Commercial & Professional Services	Commercial Services & Supplies	Home durables, textiles, & equipment	25	Estimated from external data based on product description	120	4.8	ISO	(not reported by company)	N/a	N/a (no %change reported)	N/a (product with insufficient stage-level data)	N/a (product with insufficient stage-level data)	N/a (product with insufficient stage-level data)	N/a (product with insufficient stage-level data)	N/a (product with insufficient stage-level data)	N/a (product with insufficient stage-level data)	None
17788-24-2016	2016	No	Movida (European supply chain)	Movida is simplicity itself. Rounded and welcoming, it is a flexible workstation createdfrom just a few components. It will fit anyapplication you ask of it. The models chosen for analysis offer the most popular Movida combination (reference 290000210)	Steelcase	USA	Commercial & Professional Services	Commercial Services & Supplies	Home durables, textiles, & equipment	38.337	Estimated from external data based on product description	39.6	1.03	ISO	(not reported by company)	N/a	N/a (no %change reported)	N/a (product with insufficient stage-level data)	N/a (product with insufficient stage-level data)	N/a (product with insufficient stage-level data)	N/a (product with insufficient stage-level data)	N/a (product with insufficient stage-level data)	N/a (product with insufficient stage-level data)	None
17788-25-2016	2016	No	New Think (European supply chain)	New Think is a chair designed for the mobility of users in the workplace. It is smart, simple and sustainable. New Think is Smart: because it does the New Thinking for us. It fosters wellbeing through automatic ergonomic support thanks to its advanced weight activated mechanism and new membrane of flexors. It responds to our changing postures and body movements, allowing us to get to workfaster, …	Steelcase	USA	Commercial & Professional Services	Commercial Services & Supplies	Home durables, textiles, & equipment	31	Estimated from external data based on product description	110	3.55	ISO	(not reported by company)	N/a	N/a (no %change reported)	N/a (product with insufficient stage-level data)	N/a (product with insufficient stage-level data)	N/a (product with insufficient stage-level data)	N/a (product with insufficient stage-level data)	N/a (product with insufficient stage-level data)	N/a (product with insufficient stage-level data)	None
17788-26-2016	2016	No	Ology (European supply chain)	Ology is a desking family comprised of height adjustability options, work surfaces, desk organisation options and cable management. Ology offers various ergonomic and antimicrobial treatment options to create a more health-conscious work environment. The model chosen for analysis is the most representative line (reference N111012700) from the Ology range.	Steelcase	USA	Commercial & Professional Services	Commercial Services & Supplies	Home durables, textiles, & equipment	40.9	Estimated from external data based on product description	95	2.32	ISO	(not reported by company)	N/a	N/a (no %change reported)	N/a (product with insufficient stage-level data)	N/a (product with insufficient stage-level data)	N/a (product with insufficient stage-level data)	N/a (product with insufficient stage-level data)	N/a (product with insufficient stage-level data)	N/a (product with insufficient stage-level data)	None
17788-27-2016	2016	No	Partito (European supply chain)	Design and functionality is the key concept of Partito Screen. Clear shapes and straight lines make this screen a harmonious add-on to our desk lines. The enormous range of materials and colours provides individuality. At the same time Partito Screen helps organising your work place and provides visual, territorial and (coming soon) acoustic privacy. The model chosen for analysis is the most popu…	Steelcase	USA	Commercial & Professional Services	Commercial Services & Supplies	Home durables, textiles, & equipment	14.963	Estimated from external data based on product description	60	4.01	ISO	(not reported by company)	N/a	N/a (no %change reported)	N/a (product with insufficient stage-level data)	N/a (product with insufficient stage-level data)	N/a (product with insufficient stage-level data)	N/a (product with insufficient stage-level data)	N/a (product with insufficient stage-level data)	N/a (product with insufficient stage-level data)	None
17788-28-2016	2016	No	Please (European supply chain)	The model chosen for analysis is the most popular model Please task chair (reference 468 200 MP). The task chair is a new generation of Please launched in June 1998. It is a highly adjustable ergonomic chair equipped as follows: 1. LTC2 (Lumbar-Thoracic-Cervical) mechanism 2. height adjustable backrest 3. lumbar tension adjustment 4. tilt tension adjustment 5. seat height adjustment by gaslift 6.…	Steelcase	USA	Commercial & Professional Services	Commercial Services & Supplies	Home durables, textiles, & equipment	23.623	Estimated from external data based on product description	90.9	3.85	ISO	(not reported by company)	N/a	N/a (no %change reported)	N/a (product with insufficient stage-level data)	N/a (product with insufficient stage-level data)	N/a (product with insufficient stage-level data)	N/a (product with insufficient stage-level data)	N/a (product with insufficient stage-level data)	N/a (product with insufficient stage-level data)	None
17788-29-2016	2016	No	Qivi (European supply chain)	Smart and elegant, QiVi is the new meeting energizer! QiVi allows users to move and to change postures easily, bringing more comfort to meetings thanks to its automatic adjustments. The combination of the sliding seat and pivoting backrest makes QiVi unique and comfort immediate. QiVi offers a wide range of versions and finishes: 4 leg, sled, conference, with and without armrests; plain, upholste…	Steelcase	USA	Commercial & Professional Services	Commercial Services & Supplies	Home durables, textiles, & equipment	5.17	Estimated from external data based on product description	56	10.83	ISO	(not reported by company)	N/a	N/a (no %change reported)	N/a (product with insufficient stage-level data)	N/a (product with insufficient stage-level data)	N/a (product with insufficient stage-level data)	N/a (product with insufficient stage-level data)	N/a (product with insufficient stage-level data)	N/a (product with insufficient stage-level data)	None
17788-30-2016	2016	No	Reply (European supply chain)	Reply task chair range offers two alternative styles to maximise choice in terms of design and functionality: Reply & Reply Air. The range is designed to provide four major benefits: “customisation”, “comfort”, “simplicity” and “sustainability”. The model chosen for analysis is the most frequently ordered one (Reply Air, reference 466 160 MT) from the Reply range.	Steelcase	USA	Commercial & Professional Services	Commercial Services & Supplies	Home durables, textiles, & equipment	17.7	Estimated from external data based on product description	101	5.71	ISO	(not reported by company)	N/a	N/a (no %change reported)	N/a (product with insufficient stage-level data)	N/a (product with insufficient stage-level data)	N/a (product with insufficient stage-level data)	N/a (product with insufficient stage-level data)	N/a (product with insufficient stage-level data)	N/a (product with insufficient stage-level data)	None
17788-3-2013	2013	No	Share It is a modular storage system. It offers personal storage, team storage, meeting point solutions and lockers. Share It can be also used as space dividers, structuring workspaces. - It is modular and offers endless planning possibilities. - The range enhances collaboration providing communication platforms. - It helps people concentrate thanks to acoustics absorbing surfaces. - It offers wi…	Share It is a modular storage system. It offers personal storage, team storage, meeting point solutions and lockers. Share It can be also used as space dividers, structuring workspaces. - It is modular and offers endless planning possibilities. - The range enhances collaboration providing communication platforms. - It helps people concentrate thanks to acoustics absorbing surfaces. - It offers wi…	Steelcase	USA	Commercial & Professional Services	Commercial Services & Supplies	Home durables, textiles, & equipment	52.221	Estimated from external data based on product description	110.8	2.12	ILCD Handbook	(not reported by company)	N/a	N/a (no previous data available)	N/a (product with insufficient stage-level data)	N/a (product with insufficient stage-level data)	N/a (product with insufficient stage-level data)	N/a (product with insufficient stage-level data)	N/a (product with insufficient stage-level data)	N/a (product with insufficient stage-level data)	None
17788-3-2014	2014	No	Share It modular storage system	Share It is a modular storage system. It offers personal storage, team storage, meeting point solutions and lockers. Share It can be also used as space dividers, structuring workspaces. - It is modular and offers endless planning possibilities. - The range enhances collaboration providing communication platforms. - It helps people concentrate thanks to acoustics absorbing surfaces. - It offers wi…	Steelcase	USA	Commercial & Professional Services	Commercial Services & Supplies	Home durables, textiles, & equipment	52.221	Estimated from external data based on product description	110.8	2.12	ILCD Handbook	(not reported by company)	N/a	N/a (no %change reported)	N/a (product with insufficient stage-level data)	N/a (product with insufficient stage-level data)	N/a (product with insufficient stage-level data)	N/a (product with insufficient stage-level data)	N/a (product with insufficient stage-level data)	N/a (product with insufficient stage-level data)	None
17788-32-2016	2016	No	Tenaro (European supply chain)	Tenaro Typ 10 is a range of desk simple to configure and adjust according to customized requirements.The model chosen for analysis is the most popular model Tenaro Typ 10 (reference 5412700).	Steelcase	USA	Commercial & Professional Services	Commercial Services & Supplies	Home durables, textiles, & equipment	67.323	Estimated from external data based on product description	52.6	0.78	ISO	(not reported by company)	N/a	N/a (no %change reported)	N/a (product with insufficient stage-level data)	N/a (product with insufficient stage-level data)	N/a (product with insufficient stage-level data)	N/a (product with insufficient stage-level data)	N/a (product with insufficient stage-level data)	N/a (product with insufficient stage-level data)	None
17788-33-2016	2016	No	TNT* (European supply chain)	Make your workplace a dynamic workspace. TNT* is a new kind of dynamic workspace solution with a wide range of options for all kinds of users and work styles. Thanks to its flexible architecture, TNT* allows you to expand, upgrade or adapt any configuration to the changing needs of users and teams.The model chosen for analysis is the most popular model (reference 880 000 150).	Steelcase	USA	Commercial & Professional Services	Commercial Services & Supplies	Home durables, textiles, & equipment	47.334	Estimated from external data based on product description	49.7	1.05	ISO	(not reported by company)	N/a	N/a (no %change reported)	N/a (product with insufficient stage-level data)	N/a (product with insufficient stage-level data)	N/a (product with insufficient stage-level data)	N/a (product with insufficient stage-level data)	N/a (product with insufficient stage-level data)	N/a (product with insufficient stage-level data)	None
17788-34-2016	2016	No	Universal Storage EU (European supply chain)	The Universal Storage is a large and flexible storage range that can adapt to all environments and that live up to all criteria of aesthetics and security. It is the new generation of the Universal Storage range launched in 1995. The cupboard - side opening tambour doors (reference 845 030 220) is the most sold model from the Universal Storage range.	Steelcase	USA	Commercial & Professional Services	Commercial Services & Supplies	Home durables, textiles, & equipment	69.78	Estimated from external data based on product description	103.8	1.49	ISO	(not reported by company)	N/a	N/a (no %change reported)	N/a (product with insufficient stage-level data)	N/a (product with insufficient stage-level data)	N/a (product with insufficient stage-level data)	N/a (product with insufficient stage-level data)	N/a (product with insufficient stage-level data)	N/a (product with insufficient stage-level data)	None
17788-36-2016	2016	No	Westside (European supply chain)	The Westside chair is made with a single shell, with just the right shape, angle and flexibility to provide maximum comfort for the back. The Westside chair is engineered for demanding spaces like informal office areas, cafeterias and hotels where traditional seating falls short. The model chosen for analysis is the Westside chair reference 11 LUG 30.	Steelcase	USA	Commercial & Professional Services	Commercial Services & Supplies	Home durables, textiles, & equipment	5.057	Estimated from external data based on product description	18.8	3.72	ISO	(not reported by company)	N/a	N/a (no %change reported)	N/a (product with insufficient stage-level data)	N/a (product with insufficient stage-level data)	N/a (product with insufficient stage-level data)	N/a (product with insufficient stage-level data)	N/a (product with insufficient stage-level data)	N/a (product with insufficient stage-level data)	None
17788-4-2013	2013	No	The model chosen for analysis is the most popular model Think work chair. It is a highly adjustable ergonomic chair equipped as follows: 1. Your PowerTM weight activated mechanism 2. Your ProfileTM seat and back flexors 3. Your PreferenceTM control 4. Adjustable seat depth 5. Adjustable seat height 6. Adjustable lumbar support 7. Adjustable armrests 8. Plastic base	The model chosen for analysis is the most popular model Think work chair. It is a highly adjustable ergonomic chair equipped as follows: 1. Your PowerTM weight activated mechanism 2. Your ProfileTM seat and back flexors 3. Your PreferenceTM control 4. Adjustable seat depth 5. Adjustable seat height 6. Adjustable lumbar support 7. Adjustable armrests 8. Plastic base	Steelcase	USA	Commercial & Professional Services	Commercial Services & Supplies	Home durables, textiles, & equipment	17.252	Estimated from external data based on product description	85.5	4.96	ILCD Handbook	(not reported by company)	N/a	N/a (no previous data available)	N/a (product with insufficient stage-level data)	N/a (product with insufficient stage-level data)	N/a (product with insufficient stage-level data)	N/a (product with insufficient stage-level data)	N/a (product with insufficient stage-level data)	N/a (product with insufficient stage-level data)	None
17788-4-2014	2014	No	Think work chair	The model chosen for analysis is the most popular model Think work chair. It is a highly adjustable ergonomic chair equipped as follows: 1. Your Power(TM) weight activated mechanism 2. Your Profile(TM) seat and back flexors 3. Your Preference(TM) control 4. Adjustable seat depth 5. Adjustable seat height 6. Adjustable lumbar support 7. Adjustable armrests 8. Plastic base	Steelcase	USA	Commercial & Professional Services	Commercial Services & Supplies	Home durables, textiles, & equipment	17.252	Estimated from external data based on product description	85.5	4.96	ILCD Handbook	(not reported by company)	N/a	N/a (no %change reported)	N/a (product with insufficient stage-level data)	N/a (product with insufficient stage-level data)	N/a (product with insufficient stage-level data)	N/a (product with insufficient stage-level data)	N/a (product with insufficient stage-level data)	N/a (product with insufficient stage-level data)	None
17788-5-2016	2016	No	32 Seconds (European supply chain)	32 Seconds is a universal family of seating that helps build a creative and capable workspace – and ultimately a more successful organisation – by fulfilling your people’s ergonomic requirements and personal preferences. 32 Seconds will seat all of your people in complete comfort – regardless of physique, age, gender or personal taste – and adapt itself to any kind of workstyle. What’s more it’s …	Steelcase	USA	Commercial & Professional Services	Commercial Services & Supplies	Home durables, textiles, & equipment	21.77	Estimated from external data based on product description	100.2	4.6	ISO	(not reported by company)	N/a	N/a (no %change reported)	N/a (product with insufficient stage-level data)	N/a (product with insufficient stage-level data)	N/a (product with insufficient stage-level data)	N/a (product with insufficient stage-level data)	N/a (product with insufficient stage-level data)	N/a (product with insufficient stage-level data)	None
17788-6-2016	2016	No	Activa (European supply chain)	The Activa desks are highly ergonomic and offer different height adjustable versions in a single design. Its modular construction allows very easy assembly and reconfiguration. The model chosen for analysis is the most frequently ordered one (reference W6412700) from the Activa Telescopic range. Standard features on this model include: - Top dimensions: 1600 mm x 800 mm - Melamine top, Snow WY - …	Steelcase	USA	Commercial & Professional Services	Commercial Services & Supplies	Home durables, textiles, & equipment	44.706	Estimated from external data based on product description	160	3.58	ISO	(not reported by company)	N/a	N/a (no %change reported)	N/a (product with insufficient stage-level data)	N/a (product with insufficient stage-level data)	N/a (product with insufficient stage-level data)	N/a (product with insufficient stage-level data)	N/a (product with insufficient stage-level data)	N/a (product with insufficient stage-level data)	None
17788-7-2016	2016	No	Amia (European supply chain)	The enveloping backrest and the textured, refined look of Amia are immediately inviting. And as soon as you sit down in this robust yet comfortable chair, you know you've found something special. Both the LiveLumbar™ support and the flexible seat edge angle adjust automatically to your body shape. The model chosen for analysis is the most frequently ordered task chair (model 482 200 MP) from the …	Steelcase	USA	Commercial & Professional Services	Commercial Services & Supplies	Home durables, textiles, & equipment	13.01	Estimated from external data based on product description	111.2	8.55	ISO	(not reported by company)	N/a	N/a (no %change reported)	N/a (product with insufficient stage-level data)	N/a (product with insufficient stage-level data)	N/a (product with insufficient stage-level data)	N/a (product with insufficient stage-level data)	N/a (product with insufficient stage-level data)	N/a (product with insufficient stage-level data)	None
17788-8-2016	2016	No	B-Free big cube (European supply chain)	B-Free range welcomes varied work postures - reading, reclining, or leaning in to a conversation. B-Free big cube Different shapes and sizes to follow the movements of the user whether connecting, collaborating or concentrating and to offer qualitative support in a wide variety of postures. The model chosen for analysis is the most representative one (reference N3L T00 460) from the B-Free range.	Steelcase	USA	Commercial & Professional Services	Commercial Services & Supplies	Home durables, textiles, & equipment	34.8	Estimated from external data based on product description	110	3.16	ISO	(not reported by company)	N/a	N/a (no %change reported)	N/a (product with insufficient stage-level data)	N/a (product with insufficient stage-level data)	N/a (product with insufficient stage-level data)	N/a (product with insufficient stage-level data)	N/a (product with insufficient stage-level data)	N/a (product with insufficient stage-level data)	None
17788-9-2016	2016	No	B-Free Desk (European supply chain)	B-Free Desk offers the right balance between functionality and beauty. It creates a natural and cozy atmosphere in the office, ideal to foster creativity, concentration and/or collaboration of workers. The multiple features of the desk allow users to benefit from a fully functional workstation. The model chosen for analysis is the most representative line (reference # N311012700) from the B-Free …	Steelcase	USA	Commercial & Professional Services	Commercial Services & Supplies	Home durables, textiles, & equipment	42.1	Estimated from external data based on product description	100	2.38	ISO	(not reported by company)	N/a	N/a (no %change reported)	N/a (product with insufficient stage-level data)	N/a (product with insufficient stage-level data)	N/a (product with insufficient stage-level data)	N/a (product with insufficient stage-level data)	N/a (product with insufficient stage-level data)	N/a (product with insufficient stage-level data)	None
18141-1-2015	2015	No	Fungicide	Crop protection product	Syngenta AG	Switzerland	Chemicals	Not used for 2015 reporting	Chemicals	1	As per company's submission to CDP	2.8	2.8	PAS2050	(not reported by company)	N/a	N/a (no previous data available)	N/a (product with insufficient stage-level data)	N/a (product with insufficient stage-level data)	N/a (product with insufficient stage-level data)	N/a (product with insufficient stage-level data)	N/a (product with insufficient stage-level data)	N/a (product with insufficient stage-level data)	None
18141-2-2015	2015	No	Herbicide	Crop protection product	Syngenta AG	Switzerland	Chemicals	Not used for 2015 reporting	Chemicals	1	As per company's submission to CDP	3.72	3.72	PAS2050	(not reported by company)	N/a	N/a (no previous data available)	N/a (product with insufficient stage-level data)	N/a (product with insufficient stage-level data)	N/a (product with insufficient stage-level data)	N/a (product with insufficient stage-level data)	N/a (product with insufficient stage-level data)	N/a (product with insufficient stage-level data)	None
18141-3-2015	2015	No	Insecticide	Crop protection product	Syngenta AG	Switzerland	Chemicals	Not used for 2015 reporting	Chemicals	1	As per company's submission to CDP	4.82	4.82	PAS2050	(not reported by company)	N/a	N/a (no previous data available)	N/a (product with insufficient stage-level data)	N/a (product with insufficient stage-level data)	N/a (product with insufficient stage-level data)	N/a (product with insufficient stage-level data)	N/a (product with insufficient stage-level data)	N/a (product with insufficient stage-level data)	None
18141-4-2015	2015	No	Seed treatment	Crop protection product	Syngenta AG	Switzerland	Chemicals	Not used for 2015 reporting	Chemicals	1	As per company's submission to CDP	1.02	1.02	PAS2050	(not reported by company)	N/a	N/a (no previous data available)	N/a (product with insufficient stage-level data)	N/a (product with insufficient stage-level data)	N/a (product with insufficient stage-level data)	N/a (product with insufficient stage-level data)	N/a (product with insufficient stage-level data)	N/a (product with insufficient stage-level data)	None
18288-1-2013	2013	No	Soda Ash for Unilever plc	Field not included in 2013 data	Tata Chemicals	India	Materials	Chemicals	Chemicals	1000	As per company's submission to CDP	1282	1.28	GHGP	-0.0008	Effective supply chain and process energy management	Product carbon efficiency changed	N/a (product with insufficient stage-level data)	N/a (product with insufficient stage-level data)	N/a (product with insufficient stage-level data)	N/a (product with insufficient stage-level data)	N/a (product with insufficient stage-level data)	N/a (product with insufficient stage-level data)	CO2e converted from tons to kg based on context
18288-1-2014	2014	No	Soda Ash	Soda Ash for Unilever plc	Tata Chemicals	India	Materials	Chemicals	Chemicals	1000	As per company's submission to CDP	1057	1.06	GHGP	0.0543	This product emission is only 3.58% of the total emission of all the products of the Company. Sales got decreased by 3.03% whereas absolute emission got increased by 2.24% than that of previous year which leads this increase in specific emission. Whereas Tata Chemicals overall specific emission has decreased by 1.91% compare to previous year.	Product carbon efficiency changed	N/a (product with insufficient stage-level data)	N/a (product with insufficient stage-level data)	N/a (product with insufficient stage-level data)	N/a (product with insufficient stage-level data)	N/a (product with insufficient stage-level data)	N/a (product with insufficient stage-level data)	CO2e converted from tons to kg based on context
18288-1-2015	2015	No	Soda Ash	Soda Ash for Unilever plc	Tata Chemicals	India	Chemicals	Not used for 2015 reporting	Chemicals	1000	As per company's submission to CDP	1006	1.01	ISO	-0.0486	Sales got increased by 5.46% whereas absolute emission got increased marginally by 0.33% than that of previous year which leads decrease in specific emission by 4.861%.	Product carbon efficiency changed	N/a (product with insufficient stage-level data)	N/a (product with insufficient stage-level data)	N/a (product with insufficient stage-level data)	N/a (product with insufficient stage-level data)	N/a (product with insufficient stage-level data)	N/a (product with insufficient stage-level data)	CO2e converted from tons to kg based on context
18288-1-2017	2017	No	Soda Ash	Soda Ash for Unilever plcFinal product from our end which customers uses as Final / Intermediate product	Tata Chemicals	India	Materials	Chemicals	Chemicals	1000	Estimated from external data based on product description	870	0.87	ISO	-0.1738	Sales got increased by 3.10% from previous year whereas absolute emission got decreased by 14.81% which leads overall decrease in specific emission.Emission reduction happens due to activities such as bulker transportation, emphasis on rail transport, reduction in packaging material, improved plant operational efficiency etc	Product carbon efficiency changed	N/a (product with insufficient stage-level data)	N/a (product with insufficient stage-level data)	N/a (product with insufficient stage-level data)	N/a (product with insufficient stage-level data)	N/a (product with insufficient stage-level data)	N/a (product with insufficient stage-level data)	CO2e converted from tons to kg based on context
18288-2-2013	2013	No	Soda Ash for Wal-Mart Stores, Inc.	Field not included in 2013 data	Tata Chemicals	India	Materials	Chemicals	Chemicals	1000	As per company's submission to CDP	701	0.7	GHGP	(not reported by company)	N/a	N/a (no previous data available)	N/a (product with insufficient stage-level data)	N/a (product with insufficient stage-level data)	N/a (product with insufficient stage-level data)	N/a (product with insufficient stage-level data)	N/a (product with insufficient stage-level data)	N/a (product with insufficient stage-level data)	CO2e converted from tons to kg based on context
18288-3-2014	2014	No	Soda Ash from Tata Chemicals Europe	BLANK	Tata Chemicals	India	Materials	Chemicals	Chemicals	1000	As per company's submission to CDP	840	0.84	Not reported	(not reported by company)	N/a	N/a (no %change reported)	N/a (product with insufficient stage-level data)	N/a (product with insufficient stage-level data)	N/a (product with insufficient stage-level data)	N/a (product with insufficient stage-level data)	N/a (product with insufficient stage-level data)	N/a (product with insufficient stage-level data)	Produt & total CO2e from SM3.2b; weight assumed same as other Tata Chemicals; CO2e converted from tons to kg based on context
18288-3-2015	2015	No	Soda Ash (Tata Chemicals Europe)	BLANK	Tata Chemicals	India	Chemicals	Not used for 2015 reporting	Chemicals	1000	As per company's submission to CDP	764	0.76	Not reported	(not reported by company)	N/a	N/a (no %change reported)	N/a (product with insufficient stage-level data)	N/a (product with insufficient stage-level data)	N/a (product with insufficient stage-level data)	N/a (product with insufficient stage-level data)	N/a (product with insufficient stage-level data)	N/a (product with insufficient stage-level data)	Produt & total CO2e from SM3.2b; weight assumed same as other Tata Chemicals; CO2e converted from tons to kg based on context
18288-4-2015	2015	No	Soda Ash (Tata Chemicals Magadi)	BLANK	Tata Chemicals	India	Chemicals	Not used for 2015 reporting	Chemicals	1000	As per company's submission to CDP	504	0.5	Not reported	(not reported by company)	N/a	N/a (no %change reported)	N/a (product with insufficient stage-level data)	N/a (product with insufficient stage-level data)	N/a (product with insufficient stage-level data)	N/a (product with insufficient stage-level data)	N/a (product with insufficient stage-level data)	N/a (product with insufficient stage-level data)	Produt & total CO2e from SM3.2b; weight assumed same as other Tata Chemicals; CO2e converted from tons to kg based on context
18288-5-2015	2015	No	Soda Ash (Tata Chemicals North America)	BLANK	Tata Chemicals	India	Chemicals	Not used for 2015 reporting	Chemicals	1000	As per company's submission to CDP	701	0.7	Not reported	(not reported by company)	N/a	N/a (no %change reported)	N/a (product with insufficient stage-level data)	N/a (product with insufficient stage-level data)	N/a (product with insufficient stage-level data)	N/a (product with insufficient stage-level data)	N/a (product with insufficient stage-level data)	N/a (product with insufficient stage-level data)	Produt & total CO2e from SM3.2b; weight assumed same as other Tata Chemicals; CO2e converted from tons to kg based on context
18288-6-2015	2015	No	Soda Ash (Tata Chemicals Mithapur, India)	BLANK	Tata Chemicals	India	Chemicals	Not used for 2015 reporting	Chemicals	1000	As per company's submission to CDP	1083	1.08	Not reported	(not reported by company)	N/a	N/a (no %change reported)	N/a (product with insufficient stage-level data)	N/a (product with insufficient stage-level data)	N/a (product with insufficient stage-level data)	N/a (product with insufficient stage-level data)	N/a (product with insufficient stage-level data)	N/a (product with insufficient stage-level data)	Produt & total CO2e from SM3.2b; weight assumed same as other Tata Chemicals; CO2e converted from tons to kg based on context
18344-1-2014	2014	Yes	Hot Rolled Steel	hot rolled product	Tata Steel	India	Materials	Metals & Mining	Construction & commercial materials	1000	As per company's submission to CDP	2425	2.43	Not reported	(not reported by company)	N/a	N/a (no previous data available)	Yes	0.2535	0.706	0.0405	0.0405	(included in downstream but not reported separately)	None
18344-1-2015	2015	Yes	Hot Rolled Steel (HR)	Hot rolled product	Tata Steel	India	Mining - Iron, Aluminum, Other Metals	Not used for 2015 reporting	Construction & commercial materials	1000	As per company's submission to CDP	2615	2.62	Not reported	0.08	Though manufacturing emission reduced by 0.4%; procurement of raw materials from overseas during interruption of mining operations has led to 7% increase. Additionally adoption of GHG tool V2.6 for assessment of transportation emission has increased emission by 1.5%.	Model/parameters AND product carbon efficiency changed	Yes	0.2336	0.6505	0.1159	0.1159	(included in downstream but not reported separately)	None
18344-2-2014	2014	Yes	Cold Rolled Steel	cold rolled product	Tata Steel	India	Materials	Metals & Mining	Construction & commercial materials	1000	As per company's submission to CDP	2549	2.55	Not reported	(not reported by company)	N/a	N/a (no previous data available)	Yes	0.2535	0.706	0.0405	0.0405	(included in downstream but not reported separately)	None
18344-2-2015	2015	Yes	Cold Rolled Steel (CR)	Cold rolled product	Tata Steel	India	Mining - Iron, Aluminum, Other Metals	Not used for 2015 reporting	Construction & commercial materials	1000	As per company's submission to CDP	2746	2.75	Not reported	0.08	Though manufacturing emission reduced by 0.5%; procurement of raw materials from overseas during interruption of mining operations has led to 7% increase. Additionally adoption of GHG tool V2.6 for assessment of transportation emission has increased emission by 1.5%.	Model/parameters AND product carbon efficiency changed	Yes	0.2335	0.6504	0.1161	0.1161	(included in downstream but not reported separately)	None
18344-3-2014	2014	Yes	Galvanised Steel	cold rolled product (galvanised)	Tata Steel	India	Materials	Metals & Mining	Construction & commercial materials	1000	As per company's submission to CDP	2611	2.61	Not reported	(not reported by company)	N/a	N/a (no previous data available)	Yes	0.2535	0.7059	0.0406	0.0406	(included in downstream but not reported separately)	None
18344-3-2015	2015	Yes	Galvanized Steel (Galv)	Cold rolled product with coating (galvanized)	Tata Steel	India	Mining - Iron, Aluminum, Other Metals	Not used for 2015 reporting	Construction & commercial materials	1000	As per company's submission to CDP	2820	2.82	Not reported	0.08	Though manufacturing emission reduced by 0.3%; procurement of raw materials from overseas during interruption of mining operations has led to 7% increase. Additionally adoption of GHG tool V2.6 for assessment of transportation emission has increased emission by 1.5%.	Model/parameters AND product carbon efficiency changed	Yes	0.2336	0.6506	0.1158	0.1158	(included in downstream but not reported separately)	None
18585-1-2013	2013	Yes	Tetra Brik® Aseptic Slim 200ml	Field not included in 2013 data	TETRA PAK	Sweden	Materials	Containers & Packaging	Packaging for consumer goods	0.009	Estimated from external data based on product description	0.017	1.89	ISO	(not reported by company)	N/a	N/a (no %change reported)	No	0.8824	0.1176	0	(included in up/downstream but not reported separately)	(included in downstream but not reported separately)	Streamlined product name/description to be the same across stages and years
18585-1-2014	2014	Yes	Tetra Brik® Aseptic Slim 200ml	Carton package for long-life liquid beverages	TETRA PAK	Sweden	Materials	Containers & Packaging	Packaging for consumer goods	0.009	Estimated from external data based on product description	0.017	1.89	ISO	(not reported by company)	N/a	N/a (no %change reported)	No	0.8824	0.1176	0	(included in up/downstream but not reported separately)	(included in downstream but not reported separately)	None
18585-1-2015	2015	Yes	Tetra Brik® Aseptic Slim 200ml	Carton package for long-life liquid beverages	TETRA PAK	Sweden	Containers & Packaging	Not used for 2015 reporting	Packaging for consumer goods	0.009	Estimated from external data based on product description	0.017	1.89	ISO	(not reported by company)	N/a	N/a (no %change reported)	No	0.8824	0.1176	0	(included in up/downstream but not reported separately)	(included in downstream but not reported separately)	None
18585-1-2016	2016	Yes	Tetra Brik® Aseptic Slim 200ml	Carton package for long-life liquid beverages	TETRA PAK	Sweden	Materials	Containers & Packaging	Packaging for consumer goods	0.009	Estimated from external data based on product description	0.016	1.78	ISO	(not reported by company)	N/a	N/a (no %change reported)	No	0.8125	0.1875	0	(included in up/downstream but not reported separately)	(included in downstream but not reported separately)	None
18585-2-2013	2013	Yes	Tetra Brik® Aseptic Slim 250ml	Field not included in 2013 data	TETRA PAK	Sweden	Materials	Containers & Packaging	Packaging for consumer goods	0.01	Estimated from external data based on product description	0.018	1.8	ISO	(not reported by company)	N/a	N/a (no %change reported)	No	0.8889	0.1111	0	(included in up/downstream but not reported separately)	(included in downstream but not reported separately)	Streamlined product name/description to be the same across stages and years
18585-2-2014	2014	Yes	Tetra Brik® Aseptic Slim 250ml	Carton package for long-life liquid beverages	TETRA PAK	Sweden	Materials	Containers & Packaging	Packaging for consumer goods	0.01	Estimated from external data based on product description	0.018	1.8	ISO	(not reported by company)	N/a	N/a (no %change reported)	No	0.8889	0.1111	0	(included in up/downstream but not reported separately)	(included in downstream but not reported separately)	None
18585-2-2015	2015	Yes	Tetra Brik® Aseptic Slim 250ml	Carton package for long-life liquid beverages	TETRA PAK	Sweden	Containers & Packaging	Not used for 2015 reporting	Packaging for consumer goods	0.01	Estimated from external data based on product description	0.018	1.8	ISO	(not reported by company)	N/a	N/a (no %change reported)	No	0.8889	0.1111	0	(included in up/downstream but not reported separately)	(included in downstream but not reported separately)	None
18585-2-2016	2016	Yes	Tetra Brik® Aseptic Slim 250ml	Carton package for long-life liquid beverages	TETRA PAK	Sweden	Materials	Containers & Packaging	Packaging for consumer goods	0.01	Estimated from external data based on product description	0.018	1.8	ISO	(not reported by company)	N/a	N/a (no %change reported)	No	0.8333	0.1667	0	(included in up/downstream but not reported separately)	(included in downstream but not reported separately)	None
18585-3-2013	2013	Yes	Tetra Brik® Aseptic Base 250ml	Field not included in 2013 data	TETRA PAK	Sweden	Materials	Containers & Packaging	Packaging for consumer goods	0.01	Estimated from external data based on product description	0.018	1.8	ISO	(not reported by company)	N/a	N/a (no %change reported)	No	0.8889	0.1111	0	(included in up/downstream but not reported separately)	(included in downstream but not reported separately)	Streamlined product name/description to be the same across stages and years
18585-3-2014	2014	Yes	Tetra Brik® Aseptic Base 250ml	Carton package for long-life liquid beverages	TETRA PAK	Sweden	Materials	Containers & Packaging	Packaging for consumer goods	0.01	Estimated from external data based on product description	0.018	1.8	ISO	(not reported by company)	N/a	N/a (no %change reported)	No	0.8889	0.1111	0	(included in up/downstream but not reported separately)	(included in downstream but not reported separately)	None
18585-3-2015	2015	Yes	Tetra Brik® Aseptic Base 250ml	Carton package for long-life liquid beverages	TETRA PAK	Sweden	Containers & Packaging	Not used for 2015 reporting	Packaging for consumer goods	0.01	Estimated from external data based on product description	0.018	1.8	ISO	(not reported by company)	N/a	N/a (no %change reported)	No	0.8889	0.1111	0	(included in up/downstream but not reported separately)	(included in downstream but not reported separately)	None
18585-3-2016	2016	Yes	Tetra Brik® Aseptic Base 250ml	Carton package for long-life liquid beverages	TETRA PAK	Sweden	Materials	Containers & Packaging	Packaging for consumer goods	0.01	Estimated from external data based on product description	0.017	1.7	ISO	-0.056	The results here from our carton CO2 calculator show the CO2 footprint of the carton under European conditions up to the moment when the packaging material leaves our factories. The calculated results are not exact; they are indicative and based on a number of simplifications. The results should not be used to support comparative assertions made to the public nor directly for labelling. In this u…	Model and/or parameters changed (but not product)	No	0.8235	0.1765	0	(included in up/downstream but not reported separately)	(included in downstream but not reported separately)	None
18585-4-2013	2013	Yes	Tetra Brik® Aseptic Base 1000ml	Field not included in 2013 data	TETRA PAK	Sweden	Materials	Containers & Packaging	Packaging for consumer goods	0.028	Estimated from external data based on product description	0.046	1.64	ISO	(not reported by company)	N/a	N/a (no %change reported)	No	0.8696	0.1304	0	(included in up/downstream but not reported separately)	(included in downstream but not reported separately)	Streamlined product name/description to be the same across stages and years
18585-4-2014	2014	Yes	Tetra Brik® Aseptic Base 1000ml	Carton package for long-life liquid beverages	TETRA PAK	Sweden	Materials	Containers & Packaging	Packaging for consumer goods	0.028	Estimated from external data based on product description	0.046	1.64	ISO	(not reported by company)	N/a	N/a (no %change reported)	No	0.8696	0.1304	0	(included in up/downstream but not reported separately)	(included in downstream but not reported separately)	None
18585-4-2015	2015	Yes	Tetra Brik® Aseptic Base 1000ml	Carton package for long-life liquid beverages	TETRA PAK	Sweden	Containers & Packaging	Not used for 2015 reporting	Packaging for consumer goods	0.028	Estimated from external data based on product description	0.046	1.64	ISO	(not reported by company)	N/a	N/a (no %change reported)	No	0.8696	0.1304	0	(included in up/downstream but not reported separately)	(included in downstream but not reported separately)	None
18585-4-2016	2016	Yes	Tetra Brik® Aseptic Base 1000ml	Carton package for long-life liquid beverages	TETRA PAK	Sweden	Materials	Containers & Packaging	Packaging for consumer goods	0.028	Estimated from external data based on product description	0.042	1.5	ISO	(not reported by company)	N/a	N/a (no %change reported)	No	0.8333	0.1667	0	(included in up/downstream but not reported separately)	(included in downstream but not reported separately)	None
1884-1-2013	2013	Yes	Bloomberg's standard-issue flat panel configuration (prior to 2010) was two 19" panels mounted on a metal stand. In early 2010 Bloomberg engaged in the WRI Product Life Cycle Roadtest for this functional unit (cradle-to-grave). The functional unit has a lifespan of 5 years, so the emissions indicated [in this report] are the full emissions associated with that lifespan.	Bloomberg's standard-issue flat panel configuration (prior to 2010) was two 19" panels mounted on a metal stand. In early 2010 Bloomberg engaged in the WRI Product Life Cycle Roadtest for this functional unit (cradle-to-grave). The functional unit has a lifespan of 5 years, so the emissions indicated to the right are the full emissions associated with that lifespan.	Bloomberg	USA	Media	Media	Computer, IT & telecom	14.6	Estimated from external data based on product description	9438	646.44	GHGP	(not reported by company)	N/a	N/a (no %change reported)	No	0.6462	0.0057	0.3481	0.0008	0	Streamlined product name/description for better readibility
1884-1-2014	2014	Yes	Bloomberg-Provided Flat Panel Unit	Bloomberg's standard-issue "flat panel unit" configuration, which was (up through 2012) two 19" panels mounted on a metal stand. The functional unit had a lifespan of 5 years, so the emissions indicated [in this report] are the full emissions associated with that lifespan.	Bloomberg	USA	Media	Media	Computer, IT & telecom	14.6	Estimated from external data based on product description	9438	646.44	GHGP	(not reported by company)	N/a	N/a (no %change reported)	No	0.6462	0.0057	0.3481	0.0008	0	Streamlined product name/description for better readibility
1884-1-2015	2015	Yes	Bloomberg-Provided Flat Panel Unit	Bloomberg's standard-issue "flat panel unit" configuration, which is currently two 23" panels mounted on a metal stand. The functional unit has a lifespan of 4 years, so the emissions indicated [in this report] are the full emissions associated with that lifespan.	Bloomberg	USA	Media	Not used for 2015 reporting	Computer, IT & telecom	14.6	Estimated from external data based on product description	1766	120.96	GHGP	-0.81	The 2011 flat panel LCA was performed on a non-Energy Star 19" flat panel. Since then, Bloomberg moved to an Energy Star 19" panel, and then for 2014 to an even more efficient 23" panel, meaning that most of the reduction comes from the "Customer Usage" phase of the life cycle. Additionally, the "Raw Material" phase reduced emissions due to lighter LCD screens and cables, and a change in process …	Product carbon efficiency changed	No	0.1953	0.0102	0.7946	0.0107	(included in downstream but not reported separately)	Streamlined product name/description for better readibility
1884-1-2016	2016	Yes	Bloomberg-Provided Flat Panel Unit	Bloomberg's standard-issue "flat panel unit" configuration, which is currently two 23" panels mounted on a metal stand. The functional unit has a lifespan of 4 years, so the emissions indicated [in this report] are the full emissions associated with that lifespan.	Bloomberg	USA	Media	Media	Computer, IT & telecom	14.6	Estimated from external data based on product description	1766	120.96	GHGP	(not reported by company)	N/a	N/a (no %change reported)	No	0.1953	0.0102	0.7946	0.0107	(included in downstream but not reported separately)	Streamlined product detail for better readibility
1884-2-2013	2013	Yes	Bloomberg's standard keyboard which is optional hardware available for lease to all Bloomberg Terminal customers. The functional unit has a lifespan of 3 years, so the emissions indicated [in this report] are the full emissions associated with that lifespan.	Bloomberg's standard keyboard which is optional hardware available for lease to all Bloomberg Terminal customers. The functional unit has a lifespan of 3 years, so the emissions indicated to the right are the full emissions associated with that lifespan.	Bloomberg	USA	Media	Media	Computer, IT & telecom	1.08	Estimated from external data based on product description	93.68	86.74	GHGP	(not reported by company)	N/a	N/a (no %change reported)	No	0.3396	0.1112	0.5492	0.0132	0.0116	Streamlined product name/description for better readibility
1884-2-2014	2014	Yes	Bloomberg-Provided Keyboard	Bloomberg's standard keyboard which is optional hardware available for lease to all Bloomberg Terminal customers. The functional unit has a lifespan of 3 years, so the emissions indicated [in this report] are the full emissions associated with that lifespan.	Bloomberg	USA	Media	Media	Computer, IT & telecom	1.08	Estimated from external data based on product description	93.68	86.74	GHGP	(not reported by company)	N/a	N/a (no %change reported)	No	0.3396	0.1112	0.5492	0.0132	0.0116	Streamlined product name/description for better readibility
1884-2-2015	2015	Yes	Bloomberg-Provided Keyboard	Bloomberg's standard keyboard which is optional hardware available for lease to all Bloomberg Terminal customers. The functional unit has a lifespan of 5 years, so the emissions indicated [in this report] are the full emissions associated with that lifespan.	Bloomberg	USA	Media	Not used for 2015 reporting	Computer, IT & telecom	1.08	Estimated from external data based on product description	40	37.04	GHGP	-0.57	Changes made to the keyboard since the 2011 LCA that have reduced emissions include: - Utilizing less, and less environmentally-impactful, raw materials, lowering emissions in the "Raw Material", "Assembly" and "Refurbishment" segments. - Lower energy draw, reducing energy consumption at customer sites.	Product carbon efficiency changed	No	0.5643	0.0431	0.3926	0.0326	0.0361	Streamlined product name/description for better readibility
1884-2-2016	2016	Yes	Bloomberg-Provided Keyboard	Bloomberg's standard keyboard which is optional hardware available for lease to all Bloomberg Terminal customers. The functional unit has a lifespan of 5 years, so the emissions indicated [in this report] are the full emissions associated with that lifespan.	Bloomberg	USA	Media	Media	Computer, IT & telecom	1.08	Estimated from external data based on product description	40	37.04	GHGP	(not reported by company)	N/a	N/a (no %change reported)	No	0.5643	0.0431	0.3926	0.0326	0.0361	Streamlined product detail for better readibility
1884-3-2013	2013	Yes	Bloomberg's biometric device (B-Unit) distributed to all Bloomberg Terminal customers. The functional unit has a lifespan of 3 years, so the emissions indicated [in this report] are the full emissions associated with that lifespan.	Bloomberg's biometric device (B-Unit) distributed to all Bloomberg Terminal customers. The functional unit has a lifespan of 3 years, so the emissions indicated to the right are the full emissions associated with that lifespan.	Bloomberg	USA	Media	Media	Computer, IT & telecom	0.029	Estimated from external data based on product description	2.18	75.17	GHGP	(not reported by company)	N/a	N/a (no %change reported)	No	0.8433	0.0691	0.0876	0.0138	0.0415	Streamlined product name/description for better readibility
1884-3-2014	2014	Yes	Bloomberg B-Unit	Bloomberg's biometric device (B-Unit) distributed to all Bloomberg Terminal customers. The functional unit has a lifespan of 3 years, so the emissions indicated [in this report] are the full emissions associated with that lifespan.	Bloomberg	USA	Media	Media	Computer, IT & telecom	0.029	Estimated from external data based on product description	2.18	75.17	GHGP	(not reported by company)	N/a	N/a (no %change reported)	No	0.8433	0.0691	0.0876	0.0138	0.0415	Streamlined product name/description for better readibility
1884-3-2015	2015	Yes	Bloomberg B-Unit	Bloomberg's biometric device (B-Unit) distributed to all Bloomberg Terminal customers. The functional unit has a lifespan of 3 years, so the emissions indicated [in this report] are the full emissions associated with that lifespan.	Bloomberg	USA	Media	Not used for 2015 reporting	Computer, IT & telecom	0.029	Estimated from external data based on product description	2	68.97	GHGP	-0.09	Changes made to the B-Unit since the 2011 LCA that have affected emissions include: - Utilizing less, and less environmentally-impactful, raw materials, lowering emissions in the "Raw Material" and "Assembly" phases. - The "Refurbishment" segment now requires no component replacement, lowering emissions. - Created new packaging for the B-Unit that included a small plastic component, which increas…	Product carbon efficiency changed	No	0.7839	0.1558	0.0603	0.0503	0.0101	Streamlined product name/description for better readibility
1884-3-2016	2016	Yes	Bloomberg B-Unit	Bloomberg's biometric device (B-Unit) distributed to all Bloomberg Terminal customers. The functional unit has a lifespan of 3 years, so the emissions indicated [in this report] are the full emissions associated with that lifespan.	Bloomberg	USA	Media	Media	Computer, IT & telecom	0.029	Estimated from external data based on product description	2	68.97	GHGP	(not reported by company)	N/a	N/a (no %change reported)	No	0.7839	0.1558	0.0603	0.0503	0.0101	Streamlined product detail for better readibility
19100-1-2013	2013	Yes	TG582n Home Gateway to provide multiple play telecom data services (data, voice, TV) in the home.	TG582n Home Gateway to provide multiple play telecom data services (data, voice, TV) in the home.	Technicolor SA	France	Media	Media	Computer, IT & telecom	0.599	Estimated from external data based on product description	111	185.31	ISO	(not reported by company)	N/a	N/a (no previous data available)	Yes	0.0419	0.016	0.9421	0.0097	0.003	Changed GICS to "Media", consistent with Technicolor's 2014&2015 reporting
19100-1-2014	2014	Yes	Home Gateway TG582n	Home Gateway providing multiple play telecom data services (data, voice, TV) in the home	Technicolor SA	France	Media	Media	Computer, IT & telecom	0.599	Estimated from external data based on product description	111	185.31	ISO	(not reported by company)	N/a	N/a (no %change reported)	Yes	0.0419	0.016	0.9421	0.0097	0.003	None
19100-1-2015	2015	Yes	Home Gateway TG582n	Home Gateway providing multiple play telecom data services (data, voice,TV) in the home	Technicolor SA	France	Media	Not used for 2015 reporting	Computer, IT & telecom	0.599	Estimated from external data based on product description	111	185.31	ISO	(not reported by company)	N/a	N/a (no %change reported)	Yes	0.0419	0.016	0.9421	0.0097	0.003	None
19238-3-2017	2017	Yes	GL film packages	GL films are the transparent barrier films for package. These films are used as a barrier layer in a laminated film instead of an aluminum foil. The laminated film is supplied by the roll.	Toppan Printing Co., Ltd.	Japan	Commercial & Professional Services	Commercial Services & Supplies	Home durables, textiles, & equipment	13.44	Estimated from external data based on product description	377.6	28.1	Japan CFP	-0.385	Emission factor change by used material change, and reduction in used raw materials. There are various roll sizes, so the size of roll is assumed width of 800mm and length of 1000m.	Product carbon efficiency changed	No	0.7015	0.2765	0.022	0.022	(included in downstream but not reported separately)	None
19238-4-2017	2017	Yes	MR-PET film package	MR-PET film is a film consisted of mechanically recycled PET resin. This film is used as a layer in a laminated film. The laminated film is supplied by the roll.	Toppan Printing Co., Ltd.	Japan	Commercial & Professional Services	Commercial Services & Supplies	Home durables, textiles, & equipment	13.44	Estimated from external data based on product description	363	27.01	Japan CFP	-0.039	Emission factor change by used material change. There are various roll sizes, so the size of roll is assumed width of 800mm and length of 1000m.	Product carbon efficiency changed	No	0.6894	0.3106	0	(included in up/downstream but not reported separately)	(included in downstream but not reported separately)	None
19429-1-2016	2016	Yes	Agricultural tires, BlueTire Yechnology	By analyzing the impact of the agricultural tire (LCA - Life Cycle Assessment methodology), Trelleborg is able to significantly reduce the lifetime carbon footprint on its tires, from the initial design phase through to their recycling. For the BlueTire Technology launched by Trelleborg, 1 kg of product generates CO2 equivalent emissions of around 3.8 kg. Trelleborg has measured a 6% reduction of…	Trelleborg AB	Sweden	Capital Goods	Electrical Equipment	Comm. equipm. & capital goods	370.69	As per company's submission to CDP	1408.62	3.8	ISO	(not reported by company)	N/a	N/a (no %change reported)	No	0.6392	0.3299	0.0309	0.0309	(included in downstream but not reported separately)	None
20033-1-2013	2013	Yes	Polyethylene pipe	Field not included in 2013 data	Radius Systems	United Kingdom	Capital Goods	Building Products	Comm. equipm. & capital goods	1	As per company's submission to CDP	2.52	2.52	Not reported	(not reported by company)	N/a	N/a (no %change reported)	No	0.9139	0.0794	0.0067	0.0099	(included in downstream but not reported separately)	None
20309-1-2013	2013	Yes	VW Polo V 1.6 TDI BlueMotion Technology	Field not included in 2013 data	Volkswagen AG	Germany	Automobiles & Components	Automobiles	Automobiles & components	993	Estimated from external data based on product description	21725	21.88	ISO	(not reported by company)	N/a	N/a (no %change reported)	Yes	0.1863	0.0575	0.7562	(included in up/downstream but not reported separately)	0.0053	None
20309-1-2014	2014	No	VW Polo	vehicle representing models the small segment (Polo 1.6 TDI [66 kW] BlueMotion Technology)	Volkswagen AG	Germany	Automobiles & Components	Automobiles	Automobiles & components	993	Estimated from external data based on product description	21725	21.88	Not reported	(not reported by company)	N/a	N/a (no %change reported)	N/a (product with insufficient stage-level data)	N/a (product with insufficient stage-level data)	N/a (product with insufficient stage-level data)	N/a (product with insufficient stage-level data)	N/a (product with insufficient stage-level data)	N/a (product with insufficient stage-level data)	None
20309-1-2015	2015	No	Volkswagen Polo	vehicle representing models of the small segment (Polo 1.6 TDI, 66kW, BlueMotion Technologies)	Volkswagen AG	Germany	Automobiles & Components	Not used for 2015 reporting	Automobiles & components	993	Estimated from external data based on product description	21725	21.88	ISO	(not reported by company)	N/a	N/a (no %change reported)	N/a (product with insufficient stage-level data)	N/a (product with insufficient stage-level data)	N/a (product with insufficient stage-level data)	N/a (product with insufficient stage-level data)	N/a (product with insufficient stage-level data)	N/a (product with insufficient stage-level data)	None
20309-1-2016	2016	No	Volkswagen Polo	vehicle representing models of the small segment (Polo 1.6 TDI, 66kW, BlueMotion Technologies)	Volkswagen AG	Germany	Automobiles & Components	Auto Components	Automobiles & components	993	Estimated from external data based on product description	21725	21.88	ISO	(not reported by company)	N/a	N/a (no %change reported)	N/a (product with insufficient stage-level data)	N/a (product with insufficient stage-level data)	N/a (product with insufficient stage-level data)	N/a (product with insufficient stage-level data)	N/a (product with insufficient stage-level data)	N/a (product with insufficient stage-level data)	None
20309-2-2013	2013	Yes	VW Golf VII 1.6 TDI BlueMotion Technology	Field not included in 2013 data	Volkswagen AG	Germany	Automobiles & Components	Automobiles	Automobiles & components	1358.06	Estimated from external data based on product description	22218	16.36	ISO	(not reported by company)	N/a	N/a (no %change reported)	Yes	0.1952	0.0602	0.7446	(included in up/downstream but not reported separately)	0.0052	None
20309-2-2014	2014	No	VW Golf	vehicle representing models in the compact segment (Golf 1.6 TDI [77kW] BlueMotion Technology)	Volkswagen AG	Germany	Automobiles & Components	Automobiles	Automobiles & components	1394.34	Estimated from external data based on product description	22218	15.93	ISO	(not reported by company)	N/a	N/a (no %change reported)	N/a (product with insufficient stage-level data)	N/a (product with insufficient stage-level data)	N/a (product with insufficient stage-level data)	N/a (product with insufficient stage-level data)	N/a (product with insufficient stage-level data)	N/a (product with insufficient stage-level data)	None
20309-2-2015	2015	No	Volkswagen Golf	vehicle representing models of the compact segment (Golf 1.6 TDI, 77 kW, BlueMotion Technologies)	Volkswagen AG	Germany	Automobiles & Components	Not used for 2015 reporting	Automobiles & components	1394.34	Estimated from external data based on product description	22218	15.93	ISO	(not reported by company)	N/a	N/a (no %change reported)	N/a (product with insufficient stage-level data)	N/a (product with insufficient stage-level data)	N/a (product with insufficient stage-level data)	N/a (product with insufficient stage-level data)	N/a (product with insufficient stage-level data)	N/a (product with insufficient stage-level data)	None
20309-2-2016	2016	No	Volkswagen Golf	vehicle representing models of the compact segment (Golf 1.6 TDI, 77 kW, BlueMotion Technologies)	Volkswagen AG	Germany	Automobiles & Components	Auto Components	Automobiles & components	1358.06	Estimated from external data based on product description	22218	16.36	ISO	(not reported by company)	N/a	N/a (no %change reported)	N/a (product with insufficient stage-level data)	N/a (product with insufficient stage-level data)	N/a (product with insufficient stage-level data)	N/a (product with insufficient stage-level data)	N/a (product with insufficient stage-level data)	N/a (product with insufficient stage-level data)	None
20309-3-2013	2013	Yes	Passat B7 2.0 TDI BlueMotion Technology	Field not included in 2013 data	Volkswagen AG	Germany	Automobiles & Components	Automobiles	Automobiles & components	1539.04	Estimated from external data based on product description	28011	18.2	ISO	(not reported by company)	N/a	N/a (no %change reported)	Yes	0.2054	0.0633	0.7312	(included in up/downstream but not reported separately)	0.0037	None
20309-3-2014	2014	No	VW Passat	vehicle representing models in the midsize segment (Passat 2.0 TDI [103 kW] BlueMotion Technology)	Volkswagen AG	Germany	Automobiles & Components	Automobiles	Automobiles & components	1539.04	Estimated from external data based on product description	28011	18.2	ISO	(not reported by company)	N/a	N/a (no %change reported)	N/a (product with insufficient stage-level data)	N/a (product with insufficient stage-level data)	N/a (product with insufficient stage-level data)	N/a (product with insufficient stage-level data)	N/a (product with insufficient stage-level data)	N/a (product with insufficient stage-level data)	None
20309-3-2015	2015	No	Volkswagen Passat	vehicle representing models of the midsize segment (Passat 2.0 TDI, 103 kW, BlueMotion Technologies)	Volkswagen AG	Germany	Automobiles & Components	Not used for 2015 reporting	Automobiles & components	1539.04	Estimated from external data based on product description	28011	18.2	ISO	(not reported by company)	N/a	N/a (no %change reported)	N/a (product with insufficient stage-level data)	N/a (product with insufficient stage-level data)	N/a (product with insufficient stage-level data)	N/a (product with insufficient stage-level data)	N/a (product with insufficient stage-level data)	N/a (product with insufficient stage-level data)	None
20309-3-2016	2016	No	Volkswagen Passat	vehicle representing models of the midsize segment (Passat 2.0 TDI, 103 kW, BlueMotion Technologies)	Volkswagen AG	Germany	Automobiles & Components	Auto Components	Automobiles & components	1539.04	Estimated from external data based on product description	28011	18.2	ISO	(not reported by company)	N/a	N/a (no %change reported)	N/a (product with insufficient stage-level data)	N/a (product with insufficient stage-level data)	N/a (product with insufficient stage-level data)	N/a (product with insufficient stage-level data)	N/a (product with insufficient stage-level data)	N/a (product with insufficient stage-level data)	None
20309-4-2013	2013	Yes	Audi A3 2.0 TDI	Field not included in 2013 data	Volkswagen AG	Germany	Automobiles & Components	Automobiles	Automobiles & components	1460.11	Estimated from external data based on product description	30647	20.99	ISO	(not reported by company)	N/a	N/a (no %change reported)	Yes	0.1568	0.0484	0.7948	(included in up/downstream but not reported separately)	0.0043	None
20309-5-2014	2014	No	Mean value for a vehicle within the Volkswagen Group according to CDP Report 2013 (global scope)	BLANK	Volkswagen AG	Germany	Automobiles & Components	Automobiles	Automobiles & components	1539.04	Estimated from external data based on product description	34694	22.54	Not reported	(not reported by company)	N/a	N/a (no %change reported)	N/a (product with insufficient stage-level data)	N/a (product with insufficient stage-level data)	N/a (product with insufficient stage-level data)	N/a (product with insufficient stage-level data)	N/a (product with insufficient stage-level data)	N/a (product with insufficient stage-level data)	Used SM3.2a name of good/service from SM3.2b; Total emissions set to sum of LCA stage emissions
20309-5-2015	2015	No	Mean value for a vehicle within the Volkswagen Group according to CDP Report 2014 (global scope)	BLANK	Volkswagen AG	Germany	Automobiles & Components	Not used for 2015 reporting	Automobiles & components	1539.04	Estimated from external data based on product description	33683	21.89	Not reported	(not reported by company)	N/a	N/a (no %change reported)	N/a (product with insufficient stage-level data)	N/a (product with insufficient stage-level data)	N/a (product with insufficient stage-level data)	N/a (product with insufficient stage-level data)	N/a (product with insufficient stage-level data)	N/a (product with insufficient stage-level data)	Used SM3.2a name of good/service from SM3.2b; Total emissions set to sum of LCA stage emissions
20309-6-2014	2014	No	VW up!	vehicle representing models the very small segment (up! 1.0 MPI [44kW] BlueMotion Technology)	Volkswagen AG	Germany	Automobiles & Components	Automobiles	Automobiles & components	929.864	Estimated from external data based on product description	21488	23.11	ISO	(not reported by company)	N/a	N/a (no %change reported)	N/a (product with insufficient stage-level data)	N/a (product with insufficient stage-level data)	N/a (product with insufficient stage-level data)	N/a (product with insufficient stage-level data)	N/a (product with insufficient stage-level data)	N/a (product with insufficient stage-level data)	None
20309-6-2015	2015	No	Volkswagen up!	vehicle representing models of the very small segment (up! 1.0 MPI, 44 kW, BlueMotion Technologies)	Volkswagen AG	Germany	Automobiles & Components	Not used for 2015 reporting	Automobiles & components	929.864	Estimated from external data based on product description	21488	23.11	ISO	(not reported by company)	N/a	N/a (no %change reported)	N/a (product with insufficient stage-level data)	N/a (product with insufficient stage-level data)	N/a (product with insufficient stage-level data)	N/a (product with insufficient stage-level data)	N/a (product with insufficient stage-level data)	N/a (product with insufficient stage-level data)	None
20309-6-2016	2016	No	Volkswagen up!	Vehicle representing models of the very small segment (up! 1.0 MPI /44KW BlueMotion Technologies)	Volkswagen AG	Germany	Automobiles & Components	Auto Components	Automobiles & components	929.864	Estimated from external data based on product description	21488	23.11	ISO	(not reported by company)	N/a	N/a (no %change reported)	N/a (product with insufficient stage-level data)	N/a (product with insufficient stage-level data)	N/a (product with insufficient stage-level data)	N/a (product with insufficient stage-level data)	N/a (product with insufficient stage-level data)	N/a (product with insufficient stage-level data)	None
20309-7-2014	2014	No	Audi A6	vehicle representing models in the fullsize segment (A6 3.0 TDI [180 kW])	Volkswagen AG	Germany	Automobiles & Components	Automobiles	Automobiles & components	1895.11	Estimated from external data based on product description	37094	19.57	ISO	(not reported by company)	N/a	N/a (no %change reported)	N/a (product with insufficient stage-level data)	N/a (product with insufficient stage-level data)	N/a (product with insufficient stage-level data)	N/a (product with insufficient stage-level data)	N/a (product with insufficient stage-level data)	N/a (product with insufficient stage-level data)	None
20309-7-2015	2015	No	Audi A6	vehicle representing models of the fullsize segment (A6, 3.0 TDI, 180 kW)	Volkswagen AG	Germany	Automobiles & Components	Not used for 2015 reporting	Automobiles & components	1895.11	Estimated from external data based on product description	37094	19.57	ISO	(not reported by company)	N/a	N/a (no %change reported)	N/a (product with insufficient stage-level data)	N/a (product with insufficient stage-level data)	N/a (product with insufficient stage-level data)	N/a (product with insufficient stage-level data)	N/a (product with insufficient stage-level data)	N/a (product with insufficient stage-level data)	None
20309-7-2016	2016	No	Audi A6	vehicle representing models of the fullsize segment (A6, 3.0 TDI, 180 kW)	Volkswagen AG	Germany	Automobiles & Components	Auto Components	Automobiles & components	1895.11	Estimated from external data based on product description	37094	19.57	ISO	(not reported by company)	N/a	N/a (no %change reported)	N/a (product with insufficient stage-level data)	N/a (product with insufficient stage-level data)	N/a (product with insufficient stage-level data)	N/a (product with insufficient stage-level data)	N/a (product with insufficient stage-level data)	N/a (product with insufficient stage-level data)	None
20309-8-2014	2014	No	VW Caddy	vehicle representing models in the commercial vehicle segment (Caddy 1.6 TDI [75 kW] BlueMotion Technology)	Volkswagen AG	Germany	Automobiles & Components	Automobiles	Automobiles & components	1128	Estimated from external data based on product description	28608	25.36	ISO	(not reported by company)	N/a	N/a (no %change reported)	N/a (product with insufficient stage-level data)	N/a (product with insufficient stage-level data)	N/a (product with insufficient stage-level data)	N/a (product with insufficient stage-level data)	N/a (product with insufficient stage-level data)	N/a (product with insufficient stage-level data)	None
20309-8-2015	2015	No	Volkswagen Caddy	vehicle representing models of the commercial vehicle segment (Caddy 1.6 TDI, 75 kW, BlueMOtion Technologies)	Volkswagen AG	Germany	Automobiles & Components	Not used for 2015 reporting	Automobiles & components	1128	Estimated from external data based on product description	28608	25.36	ISO	(not reported by company)	N/a	N/a (no %change reported)	N/a (product with insufficient stage-level data)	N/a (product with insufficient stage-level data)	N/a (product with insufficient stage-level data)	N/a (product with insufficient stage-level data)	N/a (product with insufficient stage-level data)	N/a (product with insufficient stage-level data)	None
20309-8-2016	2016	No	Volkswagen Caddy	vehicle representing models of the commercial vehicle segment (Caddy 1.6 TDI, 75 kW, BlueMotion Technologies)	Volkswagen AG	Germany	Automobiles & Components	Auto Components	Automobiles & components	1128	Estimated from external data based on product description	28608	25.36	ISO	(not reported by company)	N/a	N/a (no %change reported)	N/a (product with insufficient stage-level data)	N/a (product with insufficient stage-level data)	N/a (product with insufficient stage-level data)	N/a (product with insufficient stage-level data)	N/a (product with insufficient stage-level data)	N/a (product with insufficient stage-level data)	None
20309-9-2016	2016	No	Volkswagen e-up	electrified vehicle of the very small segment (calculation is based on using BluePower (clean electricity); 0 g/km CO2 driving emissions by electric mobiliy)	Volkswagen AG	Germany	Automobiles & Components	Auto Components	Automobiles & components	1185	Estimated from external data based on product description	7550	6.37	ISO	(not reported by company)	N/a	N/a (no %change reported)	N/a (product with insufficient stage-level data)	N/a (product with insufficient stage-level data)	N/a (product with insufficient stage-level data)	N/a (product with insufficient stage-level data)	N/a (product with insufficient stage-level data)	N/a (product with insufficient stage-level data)	None
20523-1-2013	2013	Yes	Alliance HPLC (High Peformance Liquid Chromatography) The Alliance is an HPLC that is unique in that it has a single set of electronic boards that control the functions for both the solvent delivery system and the autosampler in the liquid chromatograph.	Alliance HPLC (High Peformance Liquid Chromatography) The Alliance is an HPLC that is unique in that it has a single set of electronic boards that control the functions for both the solvent delivery system and the autosampler in the liquid chromatograph.	Waters Corporation	USA	Pharmaceuticals, Biotechnology & Life Sciences	Life Sciences Tools & Services	Comm. equipm. & capital goods	59	Estimated from external data based on product description	15196.6	257.57	GHGP	(not reported by company)	N/a	N/a (no previous data available)	Yes	0.0295	0.0064	0.9641	0.0581	0.6371	None
20523-1-2014	2014	Yes	Alliance (HPLC)	Separation technique low efficiency.	Waters Corporation	USA	Pharmaceuticals, Biotechnology & Life Sciences	Life Sciences Tools & Services	Comm. equipm. & capital goods	59	Estimated from external data based on product description	40215	681.61	GHGP	(not reported by company)	N/a	N/a (no previous data available)	Yes	0.0141	0.003	0.9828	0.0278	0.1665	None
20523-2-2013	2013	Yes	ACQUITY® UPLC, ACQUITY® I-Class, ACQUITY® H-Class	Field not included in 2013 data	Waters Corporation	USA	Pharmaceuticals, Biotechnology & Life Sciences	Life Sciences Tools & Services	Comm. equipm. & capital goods	25.9	Estimated from external data based on product description	17074.4	659.24	GHGP	(not reported by company)	N/a	N/a (no previous data available)	Yes	0.0407	0.0088	0.9505	0.0586	0.6517	None
20527-1-2013	2013	Yes	Electric Motor	Electric Motor with highest class efficiency and motors with class efficiency superior to the regulation	Weg S/A	Brazil	Capital Goods	Machinery	Comm. equipm. & capital goods	90	Estimated from external data based on product description	53057.5	589.53	ISO	0.57	This change from previous figure supplied is due to the increase in the emission factor (from 0.1056 ton CO2e / MWh in 2011 to 0,3593 ton CO2e / MWh in 2012). If we consider the same 2011 emission factor for 2012, the change would be a reduction of 46% in the total emissions (-46%). Internal actions for energy efficiency and maintenance actions in energy management in the factory where ISO 50001 …	Model/parameters AND product carbon efficiency changed	Yes	0.0001	0	0.9999	(included in up/downstream but not reported separately)	(included in downstream but not reported separately)	Streamlined product name/description to be the same across stages and years
20527-1-2014	2014	Yes	Electric Motor	Electric Motor with highest class efficiency and motors with class efficiency superior to the regulation	Weg S/A	Brazil	Capital Goods	Machinery	Comm. equipm. & capital goods	90	Estimated from external data based on product description	87589.4	973.22	GHGP	(not reported by company)	N/a	N/a (no %change reported)	Yes	0.0002	0	0.9998	(included in up/downstream but not reported separately)	(included in downstream but not reported separately)	Streamlined product name/description to be the same across stages and years; removed footprint %change because value inconsistent with explanation
20527-1-2015	2015	Yes	Electric Motor	Electric Motor with highest class efficiency and motors with class efficiency superior to the regulation	Weg S/A	Brazil	Electrical Equipment and Machinery	Not used for 2015 reporting	Comm. equipm. & capital goods	90	Estimated from external data based on product description	20007.6	222.31	GHGP	-0.77	WEG develops and supplies many products and services that have a direct impact upon our client’s scope 2 GHG emissions and help them in their emission reduction efforts. In the 90s, ten years before the making of laws for energy efficiency in the country, the company already offered high performance motors to the national market for. The solution efficient motors + frequency inverters (also manuf…	Product carbon efficiency changed	Yes	0.001	0.0002	0.9988	(included in up/downstream but not reported separately)	(included in downstream but not reported separately)	Streamlined product name/description to be the same across stages and years
20822-1-2013	2013	Yes	Phaser 6600	Field not included in 2013 data	Xerox Corporation	USA	Technology Hardware & Equipment	Office Electronics	Computer, IT & telecom	25.5	Estimated from external data based on product description	584	22.9	ISO	(not reported by company)	N/a	N/a (no %change reported)	No	0.036	0.6729	0.2911	(included in up/downstream but not reported separately)	0.0223	None
20822-1-2014	2014	Yes	Phaser 6600	Printing device	Xerox Corporation	USA	Technology Hardware & Equipment	Office Electronics	Computer, IT & telecom	25.5	Estimated from external data based on product description	584	22.9	ISO	(not reported by company)	N/a	N/a (no %change reported)	No	0.036	0.6729	0.2911	(included in up/downstream but not reported separately)	0.0223	Field "Methods" updated to ISO, as per company's other disclosures
20822-1-2015	2015	Yes	Phaser 6600	Printing device	Xerox Corporation	USA	Software & Services	Not used for 2015 reporting	Computer, IT & telecom	25.5	Estimated from external data based on product description	584	22.9	ISO	(not reported by company)	N/a	N/a (no %change reported)	No	0.036	0.6729	0.2911	(included in up/downstream but not reported separately)	0.0223	None
20822-1-2016	2016	Yes	Phaser 6600	Printing device	Xerox Corporation	USA	Software & Services	Software	Computer, IT & telecom	25.5	Estimated from external data based on product description	584	22.9	ISO	(not reported by company)	N/a	N/a (no %change reported)	No	0.036	0.6729	0.2911	(included in up/downstream but not reported separately)	0.0223	None
20822-2-2013	2013	Yes	ColorQube 8900	Field not included in 2013 data	Xerox Corporation	USA	Technology Hardware & Equipment	Office Electronics	Computer, IT & telecom	46.308	Estimated from external data based on product description	2445	52.8	ISO	(not reported by company)	N/a	N/a (no %change reported)	No	0.016	0.2772	0.7069	0.1358	0	None
20822-2-2014	2014	Yes	ColorQube 8900	Printing device	Xerox Corporation	USA	Technology Hardware & Equipment	Office Electronics	Computer, IT & telecom	46.308	Estimated from external data based on product description	2445	52.8	ISO	(not reported by company)	N/a	N/a (no %change reported)	No	0.016	0.2772	0.7069	0.1358	(included in downstream but not reported separately)	Field "Methods" updated to ISO, as per company's other disclosures
20822-2-2015	2015	Yes	ColorQube 8900	Printing device	Xerox Corporation	USA	Software & Services	Not used for 2015 reporting	Computer, IT & telecom	46.308	Estimated from external data based on product description	2445	52.8	ISO	(not reported by company)	N/a	N/a (no %change reported)	No	0.016	0.2772	0.7069	0.1358	(included in downstream but not reported separately)	None
20822-2-2016	2016	Yes	ColorQube 8900	Printing device	Xerox Corporation	USA	Software & Services	Software	Computer, IT & telecom	46.308	Estimated from external data based on product description	2445	52.8	ISO	(not reported by company)	N/a	N/a (no %change reported)	No	0.016	0.2772	0.7069	0.1358	(included in downstream but not reported separately)	None
20822-3-2013	2013	Yes	ColorQube 9200	Field not included in 2013 data	Xerox Corporation	USA	Technology Hardware & Equipment	Office Electronics	Computer, IT & telecom	368.8	Estimated from external data based on product description	7090	19.22	ISO	(not reported by company)	N/a	N/a (no %change reported)	No	0.0126	0.3244	0.6629	0.0826	(included in downstream but not reported separately)	None
20822-3-2014	2014	Yes	ColorQube 9200	Printing device	Xerox Corporation	USA	Technology Hardware & Equipment	Office Electronics	Computer, IT & telecom	368.8	Estimated from external data based on product description	7090	19.22	ISO	(not reported by company)	N/a	N/a (no %change reported)	No	0.0127	0.3257	0.6616	0.0807	(included in downstream but not reported separately)	Field "Methods" updated to ISO, as per company's other disclosures
20822-3-2015	2015	Yes	ColorQube 9200	Printing device	Xerox Corporation	USA	Software & Services	Not used for 2015 reporting	Computer, IT & telecom	368.8	Estimated from external data based on product description	7090	19.22	ISO	(not reported by company)	N/a	N/a (no %change reported)	No	0.0127	0.3257	0.6616	0.0807	(included in downstream but not reported separately)	None
20822-3-2016	2016	Yes	ColorQube 9200	Printing device	Xerox Corporation	USA	Software & Services	Software	Computer, IT & telecom	368.8	Estimated from external data based on product description	7090	19.22	ISO	(not reported by company)	N/a	N/a (no %change reported)	No	0.0127	0.3257	0.6616	0.0807	(included in downstream but not reported separately)	None
20822-4-2013	2013	No	ColorQube 8870	Field not included in 2013 data	Xerox Corporation	USA	Technology Hardware & Equipment	Office Electronics	Computer, IT & telecom	34.0194	Estimated from external data based on product description	2110	62.02	ISO	(not reported by company)	N/a	N/a (no %change reported)	N/a (product with insufficient stage-level data)	N/a (product with insufficient stage-level data)	N/a (product with insufficient stage-level data)	N/a (product with insufficient stage-level data)	N/a (product with insufficient stage-level data)	N/a (product with insufficient stage-level data)	None
20822-4-2014	2014	Yes	ColorQube 8870	Printing device	Xerox Corporation	USA	Technology Hardware & Equipment	Office Electronics	Computer, IT & telecom	34.0194	Estimated from external data based on product description	2011	59.11	ISO	-0.047	ISO 14040 & 14044	Model and/or parameters changed (but not product)	No	0.0388	0.091	0.8702	0.0154	(included in downstream but not reported separately)	Field "Methods" updated to ISO, as per company's other disclosures
20822-4-2015	2015	Yes	ColorQube 8870	Printing device	Xerox Corporation	USA	Software & Services	Not used for 2015 reporting	Computer, IT & telecom	34.0194	Estimated from external data based on product description	2011	59.11	ISO	(not reported by company)	N/a	N/a (no %change reported)	No	0.0388	0.091	0.8702	0.0154	(included in downstream but not reported separately)	None
20822-4-2016	2016	Yes	ColorQube 8870	Printing device	Xerox Corporation	USA	Software & Services	Software	Computer, IT & telecom	34.0194	Estimated from external data based on product description	2011	59.11	ISO	(not reported by company)	N/a	N/a (no %change reported)	No	0.0388	0.091	0.8702	0.0154	(included in downstream but not reported separately)	None
20822-5-2014	2014	Yes	Phaser 7100	Printing device	Xerox Corporation	USA	Technology Hardware & Equipment	Office Electronics	Computer, IT & telecom	44	Estimated from external data based on product description	2000	45.45	ISO	(not reported by company)	N/a	N/a (no %change reported)	No	0.1331	0.0212	0.8457	0.0227	0.0345	None
20822-5-2015	2015	Yes	Phaser 7100	Printing device	Xerox Corporation	USA	Software & Services	Not used for 2015 reporting	Computer, IT & telecom	44	Estimated from external data based on product description	2000	45.45	ISO	(not reported by company)	N/a	N/a (no %change reported)	No	0.1331	0.0212	0.8457	0.0227	0.0345	None
20822-5-2016	2016	Yes	Phaser 7100	Printing device	Xerox Corporation	USA	Software & Services	Software	Computer, IT & telecom	44	Estimated from external data based on product description	2000	45.45	ISO	(not reported by company)	N/a	N/a (no %change reported)	No	0.1331	0.0212	0.8457	0.0227	0.0345	None
20822-6-2015	2015	Yes	WorkCentre 5945/5955	Multifunctional Printing Device	Xerox Corporation	USA	Software & Services	Not used for 2015 reporting	Computer, IT & telecom	158.5	Estimated from external data based on product description	4216	26.6	ISO	(not reported by company)	N/a	N/a (no %change reported)	No	0.6427	0	0.3573	0.0175	0.0006	None
20822-6-2016	2016	Yes	WorkCentre 5945/5955	Multifunctional Printing Device	Xerox Corporation	USA	Software & Services	Software	Computer, IT & telecom	158.5	Estimated from external data based on product description	4216	26.6	ISO	(not reported by company)	N/a	N/a (no %change reported)	No	0.6429	0	0.3571	0.0173	0.0006	None
20822-7-2015	2015	Yes	WorkCentre 5325	Multifunctional Print Device STD	Xerox Corporation	USA	Software & Services	Not used for 2015 reporting	Computer, IT & telecom	137.2	Estimated from external data based on product description	1300	9.48	ISO	(not reported by company)	N/a	N/a (no %change reported)	No	0.4758	0.0261	0.4981	0.0384	0.076	None
20822-7-2016	2016	Yes	WorkCentre 5325	Multifunctional Print Device STD	Xerox Corporation	USA	Software & Services	Software	Computer, IT & telecom	137.2	Estimated from external data based on product description	1300	9.48	ISO	(not reported by company)	N/a	N/a (no %change reported)	No	0.4758	0.0261	0.4981	0.0384	0.076	None
20822-8-2015	2015	Yes	WorkCentre 5330	Multifunctional Print Device STD	Xerox Corporation	USA	Software & Services	Not used for 2015 reporting	Computer, IT & telecom	137.2	Estimated from external data based on product description	1500	10.93	ISO	(not reported by company)	N/a	N/a (no %change reported)	No	0.4153	0.0228	0.562	0.0335	0.0663	None
20822-8-2016	2016	Yes	WorkCentre 5330	Multifunctional Print Device STD	Xerox Corporation	USA	Software & Services	Software	Computer, IT & telecom	137.2	Estimated from external data based on product description	1500	10.93	ISO	(not reported by company)	N/a	N/a (no %change reported)	No	0.4153	0.0228	0.562	0.0335	0.0663	None
20822-9-2015	2015	Yes	WorkCentre 5335	Multifunctional Print Device STD	Xerox Corporation	USA	Software & Services	Not used for 2015 reporting	Computer, IT & telecom	137.2	Estimated from external data based on product description	1700	12.39	ISO	(not reported by company)	N/a	N/a (no %change reported)	No	0.3751	0.0206	0.6044	0.0302	0.0599	None
20822-9-2016	2016	Yes	WorkCentre 5335	Multifunctional Print Device STD	Xerox Corporation	USA	Software & Services	Software	Computer, IT & telecom	137.2	Estimated from external data based on product description	1700	12.39	ISO	(not reported by company)	N/a	N/a (no %change reported)	No	0.3751	0.0206	0.6044	0.0302	0.0599	None
20871-1-2015	2015	Yes	Pressure transmitter (圧力発信器) GTX	マイクロプロセッサを搭載した、高性能と高安定性を実現したスマート形差圧・圧力発信器です。気体・液体・蒸気の流量・圧力・液位の測定が可能です。測定差圧に対応した4～20mADCのアナログ信号、またはデジタル信号を出力します。 http://www.azbil.com/jp/product/iap/fi/fi_gtx.html	Azbil Corporation	Japan	Technology Hardware & Equipment	Not used for 2015 reporting	Computer, IT & telecom	3.6	Estimated from external data based on product description	42.2	11.72	ISO	(not reported by company)	N/a	N/a (no %change reported)	No	0.5423	0.2036	0.2541	0.0005	0.0002	None
20871-2-2015	2015	Yes	Photoelectric sensor (光電センサー)	光を媒体として物体の有無を検出し、電気的なオン／オフ信号を出力するセンサです。投光部と受光部で構成され、投光された光が物体により、遮光または反射した状態を受光部が検出・信号処理し出力します。 http://www.compoclub.com/products/list/switch/detail/HP7.html	Azbil Corporation	Japan	Technology Hardware & Equipment	Not used for 2015 reporting	Computer, IT & telecom	0.11	Estimated from external data based on product description	13.8	125.45	ISO	(not reported by company)	N/a	N/a (no %change reported)	No	0.017	0.0013	0.9817	0.0001	0	None
20871-5-2015	2015	Yes	Neosensor indoor temperature sensor (ネオセンサ 室内用温度センサ)	電子式の室内センサ。 温度検出素子に測温抵抗体（Pt1000）を使用した、高精度高信頼のセンサーです。 幅広い計測範囲とと優れた安定性により、一般ビル空調をはじめ、いろいろな室内用途に使用できます。 http://www.azbil.com/jp/product/ba/bas/sensor_nsensor.html	Azbil Corporation	Japan	Technology Hardware & Equipment	Not used for 2015 reporting	Computer, IT & telecom	0.11	Estimated from external data based on product description	2.5	22.73	ISO	(not reported by company)	N/a	N/a (no %change reported)	No	0.96	0.028	0.012	(included in up/downstream but not reported separately)	(included in downstream but not reported separately)	None
20871-6-2015	2015	Yes	Temperature sensor for duct (ダクト用温度センサ)	温度検出素子に白金測温抵抗体を使用した高精度高信頼度なセンサです。 幅広い計測範囲と優れた安定性により、一般ビル空調のダクトやチャンバー内をはじめ、外気の計測やいろいろな産業用途に応用できます。 http://www.azbil.com/jp/product/ba/bas/sensor_sounyu.html"	Azbil Corporation	Japan	Technology Hardware & Equipment	Not used for 2015 reporting	Computer, IT & telecom	0.24	Estimated from external data based on product description	8.3	34.58	ISO	(not reported by company)	N/a	N/a (no %change reported)	No	0.9981	0	0.0019	0.0013	0.0002	None
20947-1-2014	2014	Yes	1 fuel-efficient tire for passenger cars (乗用車用低燃費タイヤ)	ライフサイクルでのＧＨＧ排出量 Life Cycle GHG emission	Yokohama Rubber Company, Limited	Japan	Automobiles & Components	Auto Components	Automobiles & components	8.7	Estimated from external data based on product description	256.5	29.48	Not reported	(not reported by company)	N/a	N/a (no previous data available)	No	0.0936	0.0273	0.8791	0.0058	0.0515	Total emissions set to sum of LCA stage emissions; re-arranged "explanations for change" field to put English at start of field
20947-1-2015	2015	Yes	1 fuel-efficient tire for passenger cars (乗用車用低燃費タイヤ)	Low fuel consumption grade A, AA, the tire of the AAA class developed in accordance with the vehicle performance, it has delivered. (低燃費グレードA、AA、AAAクラスのタイヤを車両性能に合わせて開発し、納入しています。)	Yokohama Rubber Company, Limited	Japan	Tires	Not used for 2015 reporting	Automobiles & components	8.7	Estimated from external data based on product description	287.68	33.07	Not reported	-0.14	N/a	No specific reason reported	No	0.1377	0.04	0.8224	0.0034	0.0862	Total emissions set to sum of LCA stage emissions
20947-2-2014	2014	No	1 fuel-efficient truck and buss tireトラック・バス用低燃費タイヤ１本当たり	ライフサイクルでのＧＨＧ排出量 Life Cycle GHG emission	Yokohama Rubber Company, Limited	Japan	Automobiles & Components	Auto Components	Automobiles & components	160	Estimated from external data based on product description	1881	11.76	Not reported	(not reported by company)	N/a	N/a (no previous data available)	N/a (product with insufficient stage-level data)	N/a (product with insufficient stage-level data)	N/a (product with insufficient stage-level data)	N/a (product with insufficient stage-level data)	N/a (product with insufficient stage-level data)	N/a (product with insufficient stage-level data)	None
20947-2-2015	2015	No	1 fuel-efficient truck and buss tireトラック・バス用低燃費タイヤ１本当たり	ライフサイクルでのＧＨＧ排出量を削減するため、低燃費タイヤを車両性能に合わせて開発し、納入しています。	Yokohama Rubber Company, Limited	Japan	Tires	Not used for 2015 reporting	Automobiles & components	160	Estimated from external data based on product description	1734	10.84	Not reported	-0.078	N/a	No specific reason reported	N/a (product with insufficient stage-level data)	N/a (product with insufficient stage-level data)	N/a (product with insufficient stage-level data)	N/a (product with insufficient stage-level data)	N/a (product with insufficient stage-level data)	N/a (product with insufficient stage-level data)	None
2116-1-2015	2015	No	CHEP wooden exchange (pooled) pallet in USA 48x40	Functional unit defined as: One pallet used to transport and deliver goods from a manufacturer to a distributor in the North American supply chain. 48x40 wooden pallet. Includes weight of product being shipped on pallet.	Brambles	Australia	Trading Companies & Distributors and Commercial Services & Supplies	Not used for 2015 reporting	Comm. equipm. & capital goods	31.8	Estimated from external data based on product description	40.79	1.28	ISO	(not reported by company)	N/a	N/a (no %change reported)	N/a (product with insufficient stage-level data)	N/a (product with insufficient stage-level data)	N/a (product with insufficient stage-level data)	N/a (product with insufficient stage-level data)	N/a (product with insufficient stage-level data)	N/a (product with insufficient stage-level data)	None
2116-2-2015	2015	No	CHEP wooden exchange (pooled) pallet in Canada 48x40	Functional unit defined as: One pallet used to transport and deliver goods from a manufacturer to a distributor in the North American supply chain. 48x40 wooden pallet. Includes weight of product being shipped on pallet.	Brambles	Australia	Trading Companies & Distributors and Commercial Services & Supplies	Not used for 2015 reporting	Comm. equipm. & capital goods	31.8	Estimated from external data based on product description	35.16	1.11	ISO	(not reported by company)	N/a	N/a (no %change reported)	N/a (product with insufficient stage-level data)	N/a (product with insufficient stage-level data)	N/a (product with insufficient stage-level data)	N/a (product with insufficient stage-level data)	N/a (product with insufficient stage-level data)	N/a (product with insufficient stage-level data)	None
2116-3-2015	2015	No	Foldable reusable plastic crates (RPCs) in Australia	A comparative Life Cycle Assessment of Returnable Plastic Crates (RPC) versus a disposable cardboard carton for fresh produce distribution. Returnable plastic crate that folds flat (foldable RPC). 1000 litres of produce moved from the producer to the retail store’s inbound goods loading bay in a packaging unit that meets the Australian Retailers Specified Hygiene Standard for food transportation.	Brambles	Australia	Trading Companies & Distributors and Commercial Services & Supplies	Not used for 2015 reporting	Comm. equipm. & capital goods	2.5	Estimated from external data based on product description	20.04	8.02	ISO	(not reported by company)	N/a	N/a (no %change reported)	N/a (product with insufficient stage-level data)	N/a (product with insufficient stage-level data)	N/a (product with insufficient stage-level data)	N/a (product with insufficient stage-level data)	N/a (product with insufficient stage-level data)	N/a (product with insufficient stage-level data)	None
2116-5-2015	2015	No	CHEP wooden exchange (pooled) pallet in Canada 48x20	Functional unit defined as: One pallet used to transport and deliver goods from a manufacturer to a distributor in the North American supply chain. 48x20 wooden pallet. Includes weight of product being shipped on pallet.	Brambles	Australia	Trading Companies & Distributors and Commercial Services & Supplies	Not used for 2015 reporting	Comm. equipm. & capital goods	15.9	Estimated from external data based on product description	18.76	1.18	ISO	(not reported by company)	N/a	N/a (no %change reported)	N/a (product with insufficient stage-level data)	N/a (product with insufficient stage-level data)	N/a (product with insufficient stage-level data)	N/a (product with insufficient stage-level data)	N/a (product with insufficient stage-level data)	N/a (product with insufficient stage-level data)	None
2116-6-2015	2015	No	IFCO reusable plastic crates (RPCs) in North America	IFCO manufactures, converts, and delivers the produce containers to growers as well as managing the rental pool for collection, hygienic cleaning, reuse, and recycling of the RPCs. These containers are a rigid polypropylene container designed for multiple-uses: 1) they are display-ready and usable for chilled and humidified storage and display conditions; 2) they have an open side and base struct…	Brambles	Australia	Trading Companies & Distributors and Commercial Services & Supplies	Not used for 2015 reporting	Comm. equipm. & capital goods	2.4062	Estimated from external data based on product description	89.567	37.22	ISO	(not reported by company)	N/a	N/a (no %change reported)	N/a (product with insufficient stage-level data)	N/a (product with insufficient stage-level data)	N/a (product with insufficient stage-level data)	N/a (product with insufficient stage-level data)	N/a (product with insufficient stage-level data)	N/a (product with insufficient stage-level data)	None
2116-8-2015	2015	No	Rigid side reusable plastic crates (RPCs) in Australia	A comparative Life Cycle Assessment of Returnable Plastic Crates (RPC) versus a disposable cardboard carton for fresh produce distribution. 1000 litres of produce moved from the producer to the retail store’s inbound goods loading bay in a packaging unit that meets the Australian Retailers Specified Hygiene Standard for food transportation.	Brambles	Australia	Trading Companies & Distributors and Commercial Services & Supplies	Not used for 2015 reporting	Comm. equipm. & capital goods	2.4062	Estimated from external data based on product description	34.15	14.19	ISO	(not reported by company)	N/a	N/a (no %change reported)	N/a (product with insufficient stage-level data)	N/a (product with insufficient stage-level data)	N/a (product with insufficient stage-level data)	N/a (product with insufficient stage-level data)	N/a (product with insufficient stage-level data)	N/a (product with insufficient stage-level data)	None
2135-1-2013	2013	Yes	The Polyethylene (PE), molecular formula (CH2)n, is currently the world's main plastic material. Its properties depend on the shape of the polyethylene — given that the ones of low density are more flexible while the high density polyethylenes are more rigid. This material is produced from the polymerization of the monomer ethylene. Despite the differences between the types of polyethylene produc…	The Polyethylene (PE), molecular formula (CH2)n, is currently the world's main plastic material. Its properties depend on the shape of the polyethylene — given that the ones of low density are more flexible while the high density polyethylenes are more rigid. This material is produced from the polymerization of the monomer ethylene. Despite the differences between the types of polyethylene produc…	Braskem S/A	Brazil	Materials	Chemicals	Chemicals	1	As per company's submission to CDP	1.32	1.32	PAS2050	(not reported by company)	N/a	N/a (no previous data available)	No	0.824	0.176	0	0.0046	(included in downstream but not reported separately)	None
2135-1-2014	2014	No	Polyethylene	The Polyethylene (PE), molecular formula (CH2)n, is currently the world's main plastic material. Its properties depend on the shape of the polyethylene — given that the ones of low density are more flexible while the high density polyethylenes are more rigid. This material is produced from the polymerization of the monomer ethylene. Despite the differences between the types of polyethylene produc…	Braskem S/A	Brazil	Materials	Chemicals	Chemicals	1	As per company's submission to CDP	1.32	1.32	PAS2050	(not reported by company)	N/a	N/a (no %change reported)	N/a (product with insufficient stage-level data)	N/a (product with insufficient stage-level data)	N/a (product with insufficient stage-level data)	N/a (product with insufficient stage-level data)	N/a (product with insufficient stage-level data)	N/a (product with insufficient stage-level data)	None
2135-1-2015	2015	No	Polyethylene	The Polyethylene (PE), molecular formula (CH2)n, is currently the world's main plastic material. Its properties depend on the shape of the polyethylene — given that the ones of low density are more flexible while the high density polyethylenes are more rigid. This material is produced from the polymerization of the monomer ethylene. Despite the differences between the types of polyethylene produc…	Braskem S/A	Brazil	Chemicals	Not used for 2015 reporting	Chemicals	1	As per company's submission to CDP	1.32	1.32	PAS2050	(not reported by company)	N/a	N/a (no %change reported)	N/a (product with insufficient stage-level data)	N/a (product with insufficient stage-level data)	N/a (product with insufficient stage-level data)	N/a (product with insufficient stage-level data)	N/a (product with insufficient stage-level data)	N/a (product with insufficient stage-level data)	None
2135-1-2016	2016	No	Polyethylene	The Polyethylene (PE), molecular formula (CH2)n, is currently the world's main plastic material. Its properties depend on the shape of the polyethylene — given that the ones of low density are more flexible while the high density polyethylenes are more rigid. This material is produced from the polymerization of the monomer ethylene. Despite the differences between the types of polyethylene produc…	Braskem S/A	Brazil	Materials	Chemicals	Chemicals	1000	As per company's submission to CDP	1320	1.32	PAS2050	(not reported by company)	N/a	N/a (no %change reported)	N/a (product with insufficient stage-level data)	N/a (product with insufficient stage-level data)	N/a (product with insufficient stage-level data)	N/a (product with insufficient stage-level data)	N/a (product with insufficient stage-level data)	N/a (product with insufficient stage-level data)	Converted total CO2e from ton to kg (unit specified by company)
2135-2-2013	2013	Yes	Polypropylene (PP) or Polypropene, which has the molecular formula of (CH (CH3) - CH2)n is a resin produced from the polymerization of monomer Propene, its main feedstock. It may also be produced from a mixture of two types of monomers (ethylene and propylene), producing the PP Copolymer. This is the carbon footprint for the Polypropylene produced in Brazil. The figure provide in column "Total em…	Polypropylene (PP) or Polypropene, which has the molecular formula of (CH (CH3) - CH2)n is a resin produced from the polymerization of monomer Propene, its main feedstock. It may also be produced from a mixture of two types of monomers (ethylene and propylene), producing the PP Copolymer. This is the carbon footprint for the Polypropylene produced in Brazil. The figure provide in column "Total em…	Braskem S/A	Brazil	Materials	Chemicals	Chemicals	1	As per company's submission to CDP	1.33	1.33	PAS2050	(not reported by company)	N/a	N/a (no previous data available)	No	0.8169	0.1831	0	0.0001	(included in downstream but not reported separately)	None
2135-2-2014	2014	No	Polypropylene	Polypropylene (PP) or Polypropene, which has the molecular formula of (CH (CH3) - CH2)n is a resin produced from the polymerization of monomer Propene, its main feedstock. It may also be produced from a mixture of two types of monomers (ethylene and propylene), producing the PP Copolymer. This is the carbon footprint for the Polypropylene produced in Brazil. The figure provide in column "Total em…	Braskem S/A	Brazil	Materials	Chemicals	Chemicals	1	As per company's submission to CDP	1.33	1.33	PAS2050	(not reported by company)	N/a	N/a (no %change reported)	N/a (product with insufficient stage-level data)	N/a (product with insufficient stage-level data)	N/a (product with insufficient stage-level data)	N/a (product with insufficient stage-level data)	N/a (product with insufficient stage-level data)	N/a (product with insufficient stage-level data)	None
2135-2-2015	2015	No	Polypropylene	Polypropylene (PP) or Polypropene, which has the molecular formula of (CH (CH3) - CH2)n is a resin produced from the polymerization of monomer Propene, its main feedstock. It may also be produced from a mixture of two types of monomers (ethylene and propylene), producing the PP Copolymer. This is the carbon footprint for the Polypropylene produced in Brazil. The figure provide in column "Total em…	Braskem S/A	Brazil	Chemicals	Not used for 2015 reporting	Chemicals	1	As per company's submission to CDP	1.33	1.33	PAS2050	(not reported by company)	N/a	N/a (no %change reported)	N/a (product with insufficient stage-level data)	N/a (product with insufficient stage-level data)	N/a (product with insufficient stage-level data)	N/a (product with insufficient stage-level data)	N/a (product with insufficient stage-level data)	N/a (product with insufficient stage-level data)	None
2135-2-2016	2016	No	Polypropylene	Polypropylene (PP), which has the molecular formula of (CH (CH3) - CH2)n is a resin produced from the polymerization of monomer Propene, its main feedstock. It may also be produced from a mixture of two types of monomers (ethylene and propylene), producing the PP Copolymer. This is the carbon footprint for the Polypropylene produced in Brazil. The figure provide in column "Total emissions in kg C…	Braskem S/A	Brazil	Materials	Chemicals	Chemicals	1000	As per company's submission to CDP	1330	1.33	PAS2050	(not reported by company)	N/a	N/a (no %change reported)	N/a (product with insufficient stage-level data)	N/a (product with insufficient stage-level data)	N/a (product with insufficient stage-level data)	N/a (product with insufficient stage-level data)	N/a (product with insufficient stage-level data)	N/a (product with insufficient stage-level data)	Converted total CO2e from ton to kg (unit specified by company)
2135-3-2013	2013	Yes	The Polyvinyl Chloride (PVC; -(CH2-CHCl)n-) is the oldest plastic material. This material is produced from the polymerization of the monomer MVC. Braskem has a chlorine production unit, base material, which shall be used for the production of DCE (1,2-dichloroethane) from the mixture of chloride and ethylene. Afterwards, the DCE reacts to form MVC, the monomer for the polymerization process. The …	The Polyvinyl Chloride (PVC; -(CH2-CHCl)n-) is the oldest plastic material. This material is produced from the polymerization of the monomer MVC. Braskem has a chlorine production unit, base material, which shall be used for the production of DCE (1,2-dichloroethane) from the mixture of chloride and ethylene. Afterwards, the DCE reacts to form MVC, the monomer for the polymerization process. The …	Braskem S/A	Brazil	Materials	Chemicals	Chemicals	1	As per company's submission to CDP	1.77	1.77	PAS2050	(not reported by company)	N/a	N/a (no previous data available)	No	0.4407	0.1356	0.4237	0.4237	(included in downstream but not reported separately)	None
2135-3-2014	2014	No	Polyvinyl Chloride	The Polyvinyl Chloride (PVC; -(CH2-CHCl)n-) is the oldest plastic material. This material is produced from the polymerization of the monomer MVC. Braskem has a chlorine production unit, base material, which shall be used for the production of DCE (1,2-dichloroethane) from the mixture of chloride and ethylene. Afterwards, the DCE reacts to form MVC, the monomer for the polymerization process. The …	Braskem S/A	Brazil	Materials	Chemicals	Chemicals	1	As per company's submission to CDP	1.77	1.77	PAS2050	(not reported by company)	N/a	N/a (no %change reported)	N/a (product with insufficient stage-level data)	N/a (product with insufficient stage-level data)	N/a (product with insufficient stage-level data)	N/a (product with insufficient stage-level data)	N/a (product with insufficient stage-level data)	N/a (product with insufficient stage-level data)	None
2135-3-2015	2015	No	Polyvinyl Chloride	The Polyvinyl Chloride (PVC; -(CH2-CHCl)n-) is the oldest plastic material. This material is produced from the polymerization of the monomer MVC. Braskem has a chlorine production unit, base material, which shall be used for the production of DCE (1,2-dichloroethane) from the mixture of chloride and ethylene. Afterwards, the DCE reacts to form MVC, the monomer for the polymerization process. The …	Braskem S/A	Brazil	Chemicals	Not used for 2015 reporting	Chemicals	1	As per company's submission to CDP	1.77	1.77	Not reported	(not reported by company)	N/a	N/a (no %change reported)	N/a (product with insufficient stage-level data)	N/a (product with insufficient stage-level data)	N/a (product with insufficient stage-level data)	N/a (product with insufficient stage-level data)	N/a (product with insufficient stage-level data)	N/a (product with insufficient stage-level data)	None
2135-3-2016	2016	No	Polyvinyl Chloride	The Polyvinyl Chloride (PVC; -(CH2-CHCl)n-) is the oldest plastic material. This material is produced from the polymerization of the monomer MVC. Braskem has a chlorine production unit, base material, which shall be used for the production of DCE (1,2-dichloroethane) from the mixture of chloride and ethylene. Afterwards, the DCE reacts to form MVC, the monomer for the polymerization process. The …	Braskem S/A	Brazil	Materials	Chemicals	Chemicals	1000	As per company's submission to CDP	1770	1.77	PAS2050	(not reported by company)	N/a	N/a (no %change reported)	N/a (product with insufficient stage-level data)	N/a (product with insufficient stage-level data)	N/a (product with insufficient stage-level data)	N/a (product with insufficient stage-level data)	N/a (product with insufficient stage-level data)	N/a (product with insufficient stage-level data)	Converted total CO2e from ton to kg (unit specified by company)
21394-1-2013	2013	No	Acer 15.6" Notebook	Field not included in 2013 data	Wistron Corp	Taiwan	Technology Hardware & Equipment	Computers & Peripherals	Computer, IT & telecom	2.35868	Estimated from external data based on product description	8.8	3.73	PAS2050	(not reported by company)	N/a	N/a (no %change reported)	N/a (product with insufficient stage-level data)	N/a (product with insufficient stage-level data)	N/a (product with insufficient stage-level data)	N/a (product with insufficient stage-level data)	N/a (product with insufficient stage-level data)	N/a (product with insufficient stage-level data)	None
21477-10-2015	2015	No	LCD PC	LCD PC in our company is for Dell	Quanta Computer	Taiwan	Technology Hardware & Equipment	Not used for 2015 reporting	Computer, IT & telecom	1000	As per company's submission to CDP	1600	1.6	GHGP	-0.158	Our company has implemented a series of energy-saving emission reduction measures and Product type is changed at 2014.	Product carbon efficiency changed	N/a (product with insufficient stage-level data)	N/a (product with insufficient stage-level data)	N/a (product with insufficient stage-level data)	N/a (product with insufficient stage-level data)	N/a (product with insufficient stage-level data)	N/a (product with insufficient stage-level data)	None
21477-11-2015	2015	No	PND	PND in our company is for Vodafone and Wal-Mart	Quanta Computer	Taiwan	Technology Hardware & Equipment	Not used for 2015 reporting	Computer, IT & telecom	1000	As per company's submission to CDP	10202	10.2	GHGP	0.3	The customer product weight becomes small, the process has not changed and GHG emission has not changed, resulting in the increase of the unit product emissions.	Product carbon efficiency changed	N/a (product with insufficient stage-level data)	N/a (product with insufficient stage-level data)	N/a (product with insufficient stage-level data)	N/a (product with insufficient stage-level data)	N/a (product with insufficient stage-level data)	N/a (product with insufficient stage-level data)	None
21477-1-2015	2015	No	Note book	Note book in our company is for Dell and Acer	Quanta Computer	Taiwan	Technology Hardware & Equipment	Not used for 2015 reporting	Computer, IT & telecom	1000	As per company's submission to CDP	1330	1.33	GHGP	-0.21	Our company has implemented a series of energy-saving emission reduction measures and Product type is changed at 2014.	Product carbon efficiency changed	N/a (product with insufficient stage-level data)	N/a (product with insufficient stage-level data)	N/a (product with insufficient stage-level data)	N/a (product with insufficient stage-level data)	N/a (product with insufficient stage-level data)	N/a (product with insufficient stage-level data)	None
21477-12-2015	2015	No	Auto	Auto in our company is for Vodafone and Wal-Mart	Quanta Computer	Taiwan	Technology Hardware & Equipment	Not used for 2015 reporting	Computer, IT & telecom	1000	As per company's submission to CDP	10202	10.2	GHGP	0.3	The customer product weight becomes small, the process has not changed and GHG emission has not changed, resulting in the increase of the unit product emissions.	Product carbon efficiency changed	N/a (product with insufficient stage-level data)	N/a (product with insufficient stage-level data)	N/a (product with insufficient stage-level data)	N/a (product with insufficient stage-level data)	N/a (product with insufficient stage-level data)	N/a (product with insufficient stage-level data)	None
21477-13-2015	2015	No	Watch	Watch in our company is for Vodafone and Wal-Mart	Quanta Computer	Taiwan	Technology Hardware & Equipment	Not used for 2015 reporting	Computer, IT & telecom	1000	As per company's submission to CDP	10202	10.2	GHGP	0.3	The customer product weight becomes small, the process has not changed and GHG emission has not changed, resulting in the increase of the unit product emissions.	Product carbon efficiency changed	N/a (product with insufficient stage-level data)	N/a (product with insufficient stage-level data)	N/a (product with insufficient stage-level data)	N/a (product with insufficient stage-level data)	N/a (product with insufficient stage-level data)	N/a (product with insufficient stage-level data)	None
21477-14-2015	2015	No	Camera	camera in our company is for Microsoft	Quanta Computer	Taiwan	Technology Hardware & Equipment	Not used for 2015 reporting	Computer, IT & telecom	1000	As per company's submission to CDP	10202	10.2	GHGP	0.3	The customer product weight becomes small, the process has not changed and GHG emission has not changed, resulting in the increase of the unit product emissions.	Product carbon efficiency changed	N/a (product with insufficient stage-level data)	N/a (product with insufficient stage-level data)	N/a (product with insufficient stage-level data)	N/a (product with insufficient stage-level data)	N/a (product with insufficient stage-level data)	N/a (product with insufficient stage-level data)	None
21477-14-2016	2016	No	Camera	Camera in our company is for Microsoft	Quanta Computer	Taiwan	Technology Hardware & Equipment	Electronic Equipment, Instruments & Components	Computer, IT & telecom	0.25	Estimated from external data based on product description	5.3	21.2	GHGP	(not reported by company)	N/a	N/a (no previous data available)	N/a (product with insufficient stage-level data)	N/a (product with insufficient stage-level data)	N/a (product with insufficient stage-level data)	N/a (product with insufficient stage-level data)	N/a (product with insufficient stage-level data)	N/a (product with insufficient stage-level data)	None
21477-15-2016	2016	No	AIO	AIO in our company is for Acer	Quanta Computer	Taiwan	Technology Hardware & Equipment	Electronic Equipment, Instruments & Components	Computer, IT & telecom	8.05	Estimated from external data based on product description	5.4	0.67	GHGP	(not reported by company)	N/a	N/a (no previous data available)	N/a (product with insufficient stage-level data)	N/a (product with insufficient stage-level data)	N/a (product with insufficient stage-level data)	N/a (product with insufficient stage-level data)	N/a (product with insufficient stage-level data)	N/a (product with insufficient stage-level data)	None
21477-16-2016	2016	No	AIO	AIO in our company is for HP	Quanta Computer	Taiwan	Technology Hardware & Equipment	Electronic Equipment, Instruments & Components	Computer, IT & telecom	8.05	Estimated from external data based on product description	5.3	0.66	GHGP	0.2326	The condition of air conditioning, lighting and other equipment has not changed, but the output has decreased, resulting in an increase in the CO2e emission of unit products	Product carbon efficiency changed	N/a (product with insufficient stage-level data)	N/a (product with insufficient stage-level data)	N/a (product with insufficient stage-level data)	N/a (product with insufficient stage-level data)	N/a (product with insufficient stage-level data)	N/a (product with insufficient stage-level data)	None
21477-17-2016	2016	No	Notebook	Notebook in our company is for Acer	Quanta Computer	Taiwan	Technology Hardware & Equipment	Electronic Equipment, Instruments & Components	Computer, IT & telecom	2.95	Estimated from external data based on product description	5.4	1.83	GHGP	-0.034	Our company has implemented a series of energy-saving emission reduction measures and Product type is changed at 2016.	Product carbon efficiency changed	N/a (product with insufficient stage-level data)	N/a (product with insufficient stage-level data)	N/a (product with insufficient stage-level data)	N/a (product with insufficient stage-level data)	N/a (product with insufficient stage-level data)	N/a (product with insufficient stage-level data)	None
21477-20-2016	2016	No	Server	Server in our company is for Microsoft	Quanta Computer	Taiwan	Technology Hardware & Equipment	Electronic Equipment, Instruments & Components	Computer, IT & telecom	19.97	Estimated from external data based on product description	2.4	0.12	GHGP	-0.802	Our company has implemented a series of energy-saving emission reduction measures and Product type is changed at 2016. And the production of Microsoft server increased in 2016.	Product carbon efficiency changed	N/a (product with insufficient stage-level data)	N/a (product with insufficient stage-level data)	N/a (product with insufficient stage-level data)	N/a (product with insufficient stage-level data)	N/a (product with insufficient stage-level data)	N/a (product with insufficient stage-level data)	None
21477-21-2016	2016	No	Tablet	Tablet in our company is for HP	Quanta Computer	Taiwan	Technology Hardware & Equipment	Electronic Equipment, Instruments & Components	Computer, IT & telecom	0.35	Estimated from external data based on product description	5.3	15.14	GHGP	0.2326	The condition of air conditioning, lighting and other equipment has not changed, but the output has decreased, resulting in an increase in the CO2e emission of unit products	Product carbon efficiency changed	N/a (product with insufficient stage-level data)	N/a (product with insufficient stage-level data)	N/a (product with insufficient stage-level data)	N/a (product with insufficient stage-level data)	N/a (product with insufficient stage-level data)	N/a (product with insufficient stage-level data)	None
21477-2-2015	2015	No	Servers	Servers in our company is for Cisco and Microsoft	Quanta Computer	Taiwan	Technology Hardware & Equipment	Not used for 2015 reporting	Computer, IT & telecom	1000	As per company's submission to CDP	3248	3.25	GHGP	-0.26	Our company has implemented a series of energy-saving emission reduction measures at 2014	Product carbon efficiency changed	N/a (product with insufficient stage-level data)	N/a (product with insufficient stage-level data)	N/a (product with insufficient stage-level data)	N/a (product with insufficient stage-level data)	N/a (product with insufficient stage-level data)	N/a (product with insufficient stage-level data)	None
21477-22-2016	2016	No	VR	VR in our company is for Acer	Quanta Computer	Taiwan	Technology Hardware & Equipment	Electronic Equipment, Instruments & Components	Computer, IT & telecom	0.35	Estimated from external data based on product description	3.6	10.29	GHGP	(not reported by company)	N/a	N/a (no previous data available)	N/a (product with insufficient stage-level data)	N/a (product with insufficient stage-level data)	N/a (product with insufficient stage-level data)	N/a (product with insufficient stage-level data)	N/a (product with insufficient stage-level data)	N/a (product with insufficient stage-level data)	None
21477-3-2015	2015	No	DT	DT in our company is for Acer	Quanta Computer	Taiwan	Technology Hardware & Equipment	Not used for 2015 reporting	Computer, IT & telecom	1000	As per company's submission to CDP	1600	1.6	GHGP	-0.158	Our company has implemented a series of energy-saving emission reduction measures and Product type is changed at 2014.	Product carbon efficiency changed	N/a (product with insufficient stage-level data)	N/a (product with insufficient stage-level data)	N/a (product with insufficient stage-level data)	N/a (product with insufficient stage-level data)	N/a (product with insufficient stage-level data)	N/a (product with insufficient stage-level data)	None
21477-4-2015	2015	No	Phone	Phone in our company is for Acer	Quanta Computer	Taiwan	Technology Hardware & Equipment	Not used for 2015 reporting	Computer, IT & telecom	1000	As per company's submission to CDP	1600	1.6	GHGP	-0.158	Our company has implemented a series of energy-saving emission reduction measures and Product type is changed at 2014.	Product carbon efficiency changed	N/a (product with insufficient stage-level data)	N/a (product with insufficient stage-level data)	N/a (product with insufficient stage-level data)	N/a (product with insufficient stage-level data)	N/a (product with insufficient stage-level data)	N/a (product with insufficient stage-level data)	None
21477-5-2015	2015	No	Pad	PAD in our company is for Acer	Quanta Computer	Taiwan	Technology Hardware & Equipment	Not used for 2015 reporting	Computer, IT & telecom	1000	As per company's submission to CDP	1600	1.6	GHGP	-0.158	Our company has implemented a series of energy-saving emission reduction measures and Product type is changed at 2014.	Product carbon efficiency changed	N/a (product with insufficient stage-level data)	N/a (product with insufficient stage-level data)	N/a (product with insufficient stage-level data)	N/a (product with insufficient stage-level data)	N/a (product with insufficient stage-level data)	N/a (product with insufficient stage-level data)	None
21477-6-2015	2015	No	CHROMEBOX	CHROMEBOX in our company is for Dell	Quanta Computer	Taiwan	Technology Hardware & Equipment	Not used for 2015 reporting	Computer, IT & telecom	1000	As per company's submission to CDP	1600	1.6	GHGP	-0.158	Our company has implemented a series of energy-saving emission reduction measures and Product type is changed at 2014.	Product carbon efficiency changed	N/a (product with insufficient stage-level data)	N/a (product with insufficient stage-level data)	N/a (product with insufficient stage-level data)	N/a (product with insufficient stage-level data)	N/a (product with insufficient stage-level data)	N/a (product with insufficient stage-level data)	None
21477-7-2015	2015	No	Lamp	Lamp in our company is for Dell	Quanta Computer	Taiwan	Technology Hardware & Equipment	Not used for 2015 reporting	Computer, IT & telecom	1000	As per company's submission to CDP	1600	1.6	GHGP	-0.158	Our company has implemented a series of energy-saving emission reduction measures and Product type is changed at 2014.	Product carbon efficiency changed	N/a (product with insufficient stage-level data)	N/a (product with insufficient stage-level data)	N/a (product with insufficient stage-level data)	N/a (product with insufficient stage-level data)	N/a (product with insufficient stage-level data)	N/a (product with insufficient stage-level data)	None
21477-8-2015	2015	No	POS	POS in our company is for Dell	Quanta Computer	Taiwan	Technology Hardware & Equipment	Not used for 2015 reporting	Computer, IT & telecom	1000	As per company's submission to CDP	1600	1.6	GHGP	-0.158	Our company has implemented a series of energy-saving emission reduction measures and Product type is changed at 2014.	Product carbon efficiency changed	N/a (product with insufficient stage-level data)	N/a (product with insufficient stage-level data)	N/a (product with insufficient stage-level data)	N/a (product with insufficient stage-level data)	N/a (product with insufficient stage-level data)	N/a (product with insufficient stage-level data)	None
21477-9-2015	2015	No	Speaker	Speeker in our company is for Dell	Quanta Computer	Taiwan	Technology Hardware & Equipment	Not used for 2015 reporting	Computer, IT & telecom	1000	As per company's submission to CDP	1600	1.6	GHGP	-0.158	Our company has implemented a series of energy-saving emission reduction measures and Product type is changed at 2014.	Product carbon efficiency changed	N/a (product with insufficient stage-level data)	N/a (product with insufficient stage-level data)	N/a (product with insufficient stage-level data)	N/a (product with insufficient stage-level data)	N/a (product with insufficient stage-level data)	N/a (product with insufficient stage-level data)	None
2156-1-2016	2016	Yes	Tire including low fuel consumption tire; e.g. ECOPIA series	Tire including low fuel consumption tire based on the labelling system considered as voluntary standards by the industry and designed by JATMA (Japan Automobile Tyre Manufacturers Association). We are making efforts to lower average rolling resistance of tire. Total emissions in kg CO2e per unit [in this report] is calculated in case of ECOPIA as an example.	Bridgestone Corporation	Japan	Automobiles & Components	Auto Components	Automobiles & components	9.07185	Estimated from external data based on product description	118	13.01	JRM Assoc.	(not reported by company)	N/a	N/a (no %change reported)	No	0.0919	0.0388	0.8693	0.0028	0.1368	Streamlined product detail for better readibility
21673-1-2014	2014	Yes	Air Purifier	It filters polluted air such as dust and yellow dust using a special filter, and cleans the indoor air in homes or offices.	Coway Co Ltd	South Korea	Consumer Durables & Apparel	Household Durables	Home durables, textiles, & equipment	7.2	Estimated from external data based on product description	126	17.5	Korea CL Guide	(not reported by company)	N/a	N/a (no previous data available)	No	0.2658	0.0079	0.7263	(included in up/downstream but not reported separately)	0.0546	None
21889-1-2013	2013	No	Folding boxboard produced at the Maule and Valdivia mills.	Folding boxboard produced at the Maule and Valdivia mills.	Empresas CMPC	Chile	Materials	Paper & Forest Products	Construction & commercial materials	1000	As per company's submission to CDP	549.2	0.55	GHGP	(not reported by company)	N/a	N/a (no %change reported)	N/a (product with insufficient stage-level data)	N/a (product with insufficient stage-level data)	N/a (product with insufficient stage-level data)	N/a (product with insufficient stage-level data)	N/a (product with insufficient stage-level data)	N/a (product with insufficient stage-level data)	None
21889-1-2014	2014	Yes	Folding boxboard	Folding boxboard produced at the Maule and Valdivia mills.	Empresas CMPC	Chile	Materials	Paper & Forest Products	Construction & commercial materials	1000	As per company's submission to CDP	554.94	0.55	GHGP	0.0105	Emission factor of the purchased electricity increased from 0.379 tonnes CO2e per MWh in 2012 to 0.432 tonnes CO2e per MWh in 2013, according to official data of the Ministry of Energy of Chile. This increase impacted the Scope 2, which was 0.4678 ton CO2e per saleable ton of boxboard in 2013 and 0.4498 in 2012.	Product carbon efficiency changed	Yes	0.2642	0.7358	0	(included in up/downstream but not reported separately)	(included in downstream but not reported separately)	None
21889-1-2015	2015	Yes	Folding boxboard	Folding boxboard produced at the Maule and Valdivia mills.	Empresas CMPC	Chile	Forest and Paper Products - Forestry, Timber, Pulp and Paper, Rubber	Not used for 2015 reporting	Construction & commercial materials	1000	As per company's submission to CDP	451.46	0.45	GHGP	-0.1865	Emission factor of the purchased electricity decreased from 0.432 tonnes CO2e per MWh in 2013 to 0.360 tonnes CO2e per MWh in 2014, according to official data of the Ministry of Energy of Chile. This decrease impacted the Scope 2, which was 0.3736 ton CO2e per saleable ton of boxboard in 2014 and 0.4678 in 2013.	Product carbon efficiency changed	Yes	0.2642	0.7358	0	(included in up/downstream but not reported separately)	(included in downstream but not reported separately)	None
22295-10-2015	2015	Yes	Tako CX Lite	Tako CX Lite is a fully coated bleached paperboard with an uncoated back, based on 100% fresh forest fibres. It is suitable for gravure and offset printing and is available in sheets and reels. Typical end use is cigarette packaging.	Metsä Board	Finland	Forest and Paper Products - Forestry, Timber, Pulp and Paper, Rubber	Not used for 2015 reporting	Construction & commercial materials	1000	As per company's submission to CDP	918	0.92	Not reported	-0.01	Slight change due to mainly using more bio based materials in energy production instead of fossil fuels.	Product carbon efficiency changed	No	0.11	0.8355	0.0545	0.0545	(included in downstream but not reported separately)	None
22295-11-2015	2015	Yes	Tako CX Lite S	Tako CX Lite S is a fully coated bleached paperboard with uncoated back based on 100% fresh forest fibres. It is suitable for gravure and offset printing and it is available in sheets and reels. Typical end use is cigarette packaging.	Metsä Board	Finland	Forest and Paper Products - Forestry, Timber, Pulp and Paper, Rubber	Not used for 2015 reporting	Construction & commercial materials	1000	As per company's submission to CDP	918	0.92	Not reported	-0.01	Slight change due to mainly using more bio based materials in energy production instead of fossil fuels.	Product carbon efficiency changed	No	0.11	0.8355	0.0545	0.0545	(included in downstream but not reported separately)	None
22295-1-2013	2013	Yes	Simcote is a fully coated folding boxboard with a washed groundwood middle layer, based on 100 % fresh forest fibres. Typical end-uses are food and general packaging.	Simcote Simcote is a fully coated folding boxboard with a washed groundwood middle layer, based on 100 % fresh forest fibres. Typical end-uses are food and general packaging.	Metsä Board	Finland	Materials	Paper & Forest Products	Construction & commercial materials	1000	As per company's submission to CDP	597	0.6	Not reported	-0.12	Increase of production at the mill. Metsä Fibre pulp mill (produces Simcote's chemical pulp) use bark-based bioenergy. Pulp mill is a carbon dioxide-neutral facility under normal operations.	Product carbon efficiency changed	No	0.2127	0.7119	0.0754	0.0754	(included in downstream but not reported separately)	None
22295-1-2015	2015	Yes	Simcote	Simcote is a fully coated folding boxboard with a washed groundwood middle layer, based on 100 % fresh forest fibres. Typical end-uses are food and general packaging.	Metsä Board	Finland	Forest and Paper Products - Forestry, Timber, Pulp and Paper, Rubber	Not used for 2015 reporting	Construction & commercial materials	1000	As per company's submission to CDP	782	0.78	Not reported	-0.02	Slight change due to mainly using more bio based materials in energy production instead of fossil fuels.	Product carbon efficiency changed	No	0.1573	0.7801	0.0627	0.0627	(included in downstream but not reported separately)	None
22295-12-2015	2015	Yes	Tako CX Lite S2	Tako CX Lite S2 is a fully coated bleached paperboard with uncoated back based on 100% fresh forest fibres. It is suitable for gravure and offset printing and it is available in sheets and reels. Typical end use is cigarette packaging.	Metsä Board	Finland	Forest and Paper Products - Forestry, Timber, Pulp and Paper, Rubber	Not used for 2015 reporting	Construction & commercial materials	1000	As per company's submission to CDP	918	0.92	Not reported	(not reported by company)	N/a	N/a (no previous data available)	No	0.11	0.8355	0.0545	0.0545	(included in downstream but not reported separately)	None
22295-13-2015	2015	Yes	Tako CX Lite OBA	Tako CX Lite OBA is a fully coated bleached paperboard with an uncoated back based on 100% fresh forest fibres. It is suitable for gravure and offset printing and is available in sheets and reels. Typical end use is cigarette packaging.	Metsä Board	Finland	Forest and Paper Products - Forestry, Timber, Pulp and Paper, Rubber	Not used for 2015 reporting	Construction & commercial materials	1000	As per company's submission to CDP	918	0.92	Not reported	-0.01	Slight change due to mainly using more bio based materials in energy production instead of fossil fuels.	Product carbon efficiency changed	No	0.11	0.8355	0.0545	0.0545	(included in downstream but not reported separately)	None
22295-14-2015	2015	Yes	Tako CX White S	Tako CX White S is a fully coated bleached paperboard with a coated back, based on 100 % fresh forest fibres. It is suitable for gravure and offset printing and it is available in sheets and reels. Typical end use is cigarette packaging.	Metsä Board	Finland	Forest and Paper Products - Forestry, Timber, Pulp and Paper, Rubber	Not used for 2015 reporting	Construction & commercial materials	1000	As per company's submission to CDP	900	0.9	Not reported	-0.03	Slight change due to mainly using more bio based materials in energy production instead of fossil fuels.	Product carbon efficiency changed	No	0.1122	0.8322	0.0556	0.0556	(included in downstream but not reported separately)	None
22295-15-2016	2016	No	Metsä Board Classic FBB (Simcote)	MetsäBoard Classic FBB is a fully coated folding boxboard (GC2) available in a basis weight range of 200-340 g/m² and suitable for offset, flexo and digital printing.	Metsä Board	Finland	Materials	Paper & Forest Products	Construction & commercial materials	1000	As per company's submission to CDP	807	0.81	Paper Profile	0.03	Small deviation depending of the fuel mix used.	Product carbon efficiency changed	N/a (product with insufficient stage-level data)	N/a (product with insufficient stage-level data)	N/a (product with insufficient stage-level data)	N/a (product with insufficient stage-level data)	N/a (product with insufficient stage-level data)	N/a (product with insufficient stage-level data)	None
22295-16-2016	2016	Yes	Metsä Board Classic FBB CX (Tako Lite CX))	MetsäBoard Classic FBB CX is a fully coated paperboard, without optical brightening agents, available in a basis weight range of 200-225 g/m². It is highly suitable for gravure, offset and flexo printing.	Metsä Board	Finland	Materials	Paper & Forest Products	Construction & commercial materials	1000	As per company's submission to CDP	767	0.77	Paper Profile	-0.15	Increased production volume and improved operating efficiency.	Product carbon efficiency changed	No	0.2503	0.7497	0	(included in up/downstream but not reported separately)	(included in downstream but not reported separately)	None
22295-17-2016	2016	Yes	Metsä Board Natural FSB Cup - new product	MetsäBoard Natural FSB Cup is an uncoated food service board, available in a basis weight range of 185-355 g/m², suitable for offset and flexo printing.	Metsä Board	Finland	Materials	Paper & Forest Products	Construction & commercial materials	1000	As per company's submission to CDP	369	0.37	Paper Profile	(not reported by company)	N/a	N/a (no previous data available)	No	0.4851	0.5149	0	(included in up/downstream but not reported separately)	(included in downstream but not reported separately)	None
22295-18-2016	2016	Yes	Metsä Board Prime FBB (Carta Elega)	MetsäBoard Prime FBB is a fully coated bleached paperboard with coated back, available in a basis weight range of 205-380g/m² and suitable for offset, gravure, flexo and digital printing.	Metsä Board	Finland	Materials	Paper & Forest Products	Construction & commercial materials	1000	As per company's submission to CDP	804	0.8	Paper Profile	0.02	At Metsä Board Kyro mill one paper machine was closed in 2016. This may have caused small changes in the powerplant operation	Product carbon efficiency changed	No	0.2287	0.7713	0	(included in up/downstream but not reported separately)	(included in downstream but not reported separately)	None
22295-19-2016	2016	Yes	Metsä Board Prime FBB Bright (Carta Integra)	MetsäBoard Prime FBB Bright is a fully coated bleached paperboard with coated back, available in a basis weight range of 170-330 g/m² and suitable for offset, gravure, flexo and digital printing.	Metsä Board	Finland	Materials	Paper & Forest Products	Construction & commercial materials	1000	As per company's submission to CDP	534	0.53	Paper Profile	-0.04	Small deviation depending of the fuel mix used.	Product carbon efficiency changed	No	0.367	0.633	0	(included in up/downstream but not reported separately)	(included in downstream but not reported separately)	None
22295-20-2016	2016	Yes	Metsä Board Prime FBB CX (Tako CX White S)	MetsäBoard Prime FBB CX is a fully coated paperboard with coated back, available in a basis weight range of 215-240 g/m² and suitable for gravure, offset and flexo printing.	Metsä Board	Finland	Materials	Paper & Forest Products	Construction & commercial materials	1000	As per company's submission to CDP	767	0.77	Paper Profile	-0.14	Increased production volume and improved operating efficiency.	Product carbon efficiency changed	No	0.2807	0.7193	0	(included in up/downstream but not reported separately)	(included in downstream but not reported separately)	None
22295-21-2016	2016	Yes	Metsä Board Prime FBB CXB (Carta Allura)	MetsäBoard Prime FBB CXB is a fully coated bleached paperboard with coated back, available in a basis weight range of 225-260 g/m² and suitable for offset, gravure, flexo and digital printing.	Metsä Board	Finland	Materials	Paper & Forest Products	Construction & commercial materials	1000	As per company's submission to CDP	766	0.77	Paper Profile	-0.13	Increased production volume and improved operating efficiency.	Product carbon efficiency changed	No	0.2732	0.7268	0	(included in up/downstream but not reported separately)	(included in downstream but not reported separately)	None
22295-2-2013	2013	Yes	Carta Elega is a fully coated folding boxboard, GC1, based on 100 % fresh forest fibres. Typical end uses are cosmetics and other luxury packagings and graphical applications.	Carta Elega Carta Elega is a fully coated folding boxboard, GC1, based on 100 % fresh forest fibres. Typical end uses are cosmetics and other luxury packagings and graphical applications.	Metsä Board	Finland	Materials	Paper & Forest Products	Construction & commercial materials	1000	As per company's submission to CDP	482	0.48	Not reported	-0.54	A biopower plant was built at Metsä Board's Kyro mill. The new plant produces electricity and heat and replaces the use of fossil natural gas at the mill. The carbon footprints of the folding poxboards produced at the mill be reduced by half.	Product carbon efficiency changed	No	0.2635	0.6245	0.112	0.112	(included in downstream but not reported separately)	None
22295-2-2015	2015	Yes	Carta Elega	Carta Elega is a fully coated folding boxboard, GC1, based on 100 % fresh forest fibres. Typical end uses are cosmetics and other luxury packagings and graphical applications.	Metsä Board	Finland	Forest and Paper Products - Forestry, Timber, Pulp and Paper, Rubber	Not used for 2015 reporting	Construction & commercial materials	1000	As per company's submission to CDP	804	0.8	Not reported	0.11	Emissions of purchased energy (electricity) has grown. Other emissions have been in the same level.	Product carbon efficiency changed	No	0.1555	0.7711	0.0734	0.0734	(included in downstream but not reported separately)	None
22295-22-2016	2016	No	Metsä Board Prime FBB CXL (Tako HiD L JTI)	MetsäBoard Prime FBB CX is a fully coated paperboard with coated back, available in basis weight range of 235 g/m² and is suitable for gravure, offset and flexo printing.	Metsä Board	Finland	Materials	Paper & Forest Products	Construction & commercial materials	1000	As per company's submission to CDP	767	0.77	Paper Profile	-0.13	Increased production volume and improved operating efficiency.	Product carbon efficiency changed	N/a (product with insufficient stage-level data)	N/a (product with insufficient stage-level data)	N/a (product with insufficient stage-level data)	N/a (product with insufficient stage-level data)	N/a (product with insufficient stage-level data)	N/a (product with insufficient stage-level data)	None
22295-23-2016	2016	Yes	Metsä Board Prime FBB CXX (Tako HiD X JTI)	MetsäBoard Prime FBB CX is a fully coated paperboard with coated back, available in basis weight 270 g/m² and is suitable for gravure, offset and flexo printing.	Metsä Board	Finland	Materials	Paper & Forest Products	Construction & commercial materials	1000	As per company's submission to CDP	767	0.77	Paper Profile	-0.13	Increased production volume and improved operating efficiency.	Product carbon efficiency changed	No	0.2807	0.7193	0	(included in up/downstream but not reported separately)	(included in downstream but not reported separately)	None
22295-24-2016	2016	Yes	Metsä Board Pro FBB (Avanta Prima)	MetsäBoard Pro FBB is a fully coated folding boxboard (GC2) available in a basis weight range of 205-355 g/m² and suitable for offset, gravure, flexo and digital printing.	Metsä Board	Finland	Materials	Paper & Forest Products	Construction & commercial materials	1000	As per company's submission to CDP	811	0.81	Paper Profile	0.03	At Metsä Board Kyro mill one paper machine was closed in 2016. This may have caused small changes in the powerplant operation.	Product carbon efficiency changed	No	0.2121	0.7879	0	(included in up/downstream but not reported separately)	(included in downstream but not reported separately)	None
22295-25-2016	2016	Yes	Metsä Board Pro FBB Bright (Carta Solida)	MetsäBoard Pro FBB Bright is a fully coated bleached paperboard with white back, available in a basis weight range of 185-350 g/m² and suitable for offset, gravure, flexo and digital printing as well as for litholamination	Metsä Board	Finland	Materials	Paper & Forest Products	Construction & commercial materials	1000	As per company's submission to CDP	534	0.53	Paper Profile	-0.04	Small deviation depending of the fuel mix used.	Product carbon efficiency changed	No	0.367	0.633	0	(included in up/downstream but not reported separately)	(included in downstream but not reported separately)	None
22295-26-2016	2016	Yes	MetsäBoard Pro FBB CX (Tako CX Lite S)	MetsäBoard Pro FBB CX is a fully coated paperboard, available in a basis weight range of 200-225g/m², suitable for gravure, offset and flexo printing.	Metsä Board	Finland	Materials	Paper & Forest Products	Construction & commercial materials	1000	As per company's submission to CDP	776	0.78	Paper Profile	-0.13	Increased production volume and improved operating efficiency.	Product carbon efficiency changed	No	0.259	0.741	0	(included in up/downstream but not reported separately)	(included in downstream but not reported separately)	None
22295-3-2013	2013	Yes	Avanta Prima is a fully coated folding boxboard, GC2, based on 100 % fresh forest fibress. Typical end uses are high-quality pharmaceuticals, daily cosmetics and food packagings.	Avanta Prima Avanta Prima is a fully coated folding boxboard, GC2, based on 100 % fresh forest fibress. Typical end uses are high-quality pharmaceuticals, daily cosmetics and food packagings.	Metsä Board	Finland	Materials	Paper & Forest Products	Construction & commercial materials	1000	As per company's submission to CDP	478	0.48	Not reported	-0.5	A biopower plant was built at Metsä Board's Kyro mill. The new plant produces electricity and heat and replaces the use of fossil natural gas at the mill. The carbon footprints of the folding poxboards produced at the mill be reduced by half.	Product carbon efficiency changed	No	0.2443	0.643	0.1127	0.1127	(included in downstream but not reported separately)	None
22295-3-2015	2015	Yes	Avanta Prima	Avanta Prima is a fully coated folding boxboard, GC2, based on 100 % fresh forest fibress. Typical end uses are high-quality pharmaceuticals, daily cosmetics and food packagings.	Metsä Board	Finland	Forest and Paper Products - Forestry, Timber, Pulp and Paper, Rubber	Not used for 2015 reporting	Construction & commercial materials	1000	As per company's submission to CDP	811	0.81	Not reported	0.14	Emissions of purchased energy (electricity) has grown. Other emissions have been in the same level.	Product carbon efficiency changed	No	0.1406	0.7842	0.0752	0.0752	(included in downstream but not reported separately)	None
22295-4-2013	2013	Yes	Carta Solida is a fully coated BCTMP board with a white back, based on 100 % fresh forest fibres. Carta Solida is suitable for packaging and graphical end uses and it is available in reels and sheets.	Carta Solida Carta Solida is a fully coated BCTMP board with a white back, based on 100 % fresh forest fibres. Carta Solida is suitable for packaging and graphical end uses and it is available in reels and sheets.	Metsä Board	Finland	Materials	Paper & Forest Products	Construction & commercial materials	1000	As per company's submission to CDP	359	0.36	Not reported	0.035	Emissions of purchased energy (electricity) has grown.	Product carbon efficiency changed	No	0.4234	0.4401	0.1365	0.1365	(included in downstream but not reported separately)	None
22295-4-2015	2015	Yes	Carta Solida	Carta Solida is a fully coated BCTMP board with a white back, based on 100 % fresh forest fibres. Carta Solida is suitable for packaging and graphical end uses and it is available in reels and sheets.	Metsä Board	Finland	Forest and Paper Products - Forestry, Timber, Pulp and Paper, Rubber	Not used for 2015 reporting	Construction & commercial materials	1000	As per company's submission to CDP	534	0.53	Not reported	-0.01	Slight change due to mainly using more bio based materials in energy production instead of fossil fuels.	Product carbon efficiency changed	No	0.2753	0.633	0.0918	0.0918	(included in downstream but not reported separately)	None
22295-5-2013	2013	Yes	Carta Integra is a fully coated BCTMP board with a coated back, based on 100 % fresh forest fibres. Carta Integra is suitable for graphical and packaging end uses and it is available in reels and sheets.	Carta Integra Carta Integra is a fully coated BCTMP board with a coated back, based on 100 % fresh forest fibres. Carta Integra is suitable for graphical and packaging end uses and it is available in reels and sheets.	Metsä Board	Finland	Materials	Paper & Forest Products	Construction & commercial materials	1000	As per company's submission to CDP	359	0.36	Not reported	(not reported by company)	N/a	N/a (no %change reported)	No	0.4234	0.4401	0.1365	0.1365	(included in downstream but not reported separately)	None
22295-5-2015	2015	Yes	Carta Integra	Carta Integra is a fully coated BCTMP board with a coated back, based on 100 % fresh forest fibres. Carta Integra is suitable for graphical and packaging end uses and it is available in reels and sheets.	Metsä Board	Finland	Forest and Paper Products - Forestry, Timber, Pulp and Paper, Rubber	Not used for 2015 reporting	Construction & commercial materials	1000	As per company's submission to CDP	534	0.53	Not reported	-0.01	Slight change due to mainly using more bio based materials in energy production instead of fossil fuels.	Product carbon efficiency changed	No	0.2753	0.633	0.0918	0.0918	(included in downstream but not reported separately)	None
22295-6-2013	2013	Yes	Kemiart Brite is a tradional white top kraftliner for retail packages with large colour-printed areas and line pictures with excellent contrast, based on 100 % fresh forest fibres. It is used for corrugated packaging.	Kemiart Brite Kemiart Brite is a tradional white top kraftliner for retail packages with large colour-printed areas and line pictures with excellent contrast, based on 100 % fresh forest fibres. It is used for corrugated packaging.	Metsä Board	Finland	Materials	Paper & Forest Products	Construction & commercial materials	1000	As per company's submission to CDP	398	0.4	Not reported	(not reported by company)	N/a	N/a (no %change reported)	No	0.3769	0.4774	0.1457	0.1457	(included in downstream but not reported separately)	None
22295-7-2013	2013	Yes	Batabak 515 is a fully coated bleached paperboard with uncoated back, based on 100 % fresh forest fibres. Typical end use is cigarette packaging.	Batabak 515 Batabak 515 is a fully coated bleached paperboard with uncoated back, based on 100 % fresh forest fibres. Typical end use is cigarette packaging.	Metsä Board	Finland	Materials	Paper & Forest Products	Construction & commercial materials	1000	As per company's submission to CDP	781	0.78	Not reported	(not reported by company)	N/a	N/a (no %change reported)	No	0.1716	0.7631	0.0653	0.0653	(included in downstream but not reported separately)	None
22295-8-2013	2013	Yes	Batabak 580 is a fully coated bleached paperboard with a coated back, based on 100 % fresh forest fibres. Typical end use is cigarette packaging.	Batabak 580 Batabak 580 is a fully coated bleached paperboard with a coated back, based on 100 % fresh forest fibres. Typical end use is cigarette packaging.	Metsä Board	Finland	Materials	Paper & Forest Products	Construction & commercial materials	1000	As per company's submission to CDP	792	0.79	Not reported	(not reported by company)	N/a	N/a (no %change reported)	No	0.1871	0.7484	0.0645	0.0645	(included in downstream but not reported separately)	None
22295-9-2013	2013	Yes	Batabak 510 is a fully coated bleached paperboard with uncoated back, based on 100 % fresh forest fibres. Typical end use is cigarette packaging.	Batabak 510 Batabak 510 is a fully coated bleached paperboard with uncoated back, based on 100 % fresh forest fibres. Typical end use is cigarette packaging.	Metsä Board	Finland	Materials	Paper & Forest Products	Construction & commercial materials	1000	As per company's submission to CDP	781	0.78	Not reported	(not reported by company)	N/a	N/a (no %change reported)	No	0.1716	0.7631	0.0653	0.0653	(included in downstream but not reported separately)	None
22322-1-2014	2014	No	Glass container	355ml carbonated beverage container from Asia-Pacific	Owens-Illinois	USA	Materials	Containers & Packaging	Packaging for consumer goods	0.416	Estimated from external data based on product description	0.153	0.37	ISO	(not reported by company)	N/a	N/a (no previous data available)	N/a (product with insufficient stage-level data)	N/a (product with insufficient stage-level data)	N/a (product with insufficient stage-level data)	N/a (product with insufficient stage-level data)	N/a (product with insufficient stage-level data)	N/a (product with insufficient stage-level data)	None
22322-2-2014	2014	No	Glass container	355ml carbonated beverage container from Europe	Owens-Illinois	USA	Materials	Containers & Packaging	Packaging for consumer goods	0.416	Estimated from external data based on product description	0.11	0.26	ISO	(not reported by company)	N/a	N/a (no previous data available)	N/a (product with insufficient stage-level data)	N/a (product with insufficient stage-level data)	N/a (product with insufficient stage-level data)	N/a (product with insufficient stage-level data)	N/a (product with insufficient stage-level data)	N/a (product with insufficient stage-level data)	None
22322-3-2014	2014	No	Glass container	355ml carbonated beverage container from Latin America	Owens-Illinois	USA	Materials	Containers & Packaging	Packaging for consumer goods	0.416	Estimated from external data based on product description	0.117	0.28	ISO	(not reported by company)	N/a	N/a (no previous data available)	N/a (product with insufficient stage-level data)	N/a (product with insufficient stage-level data)	N/a (product with insufficient stage-level data)	N/a (product with insufficient stage-level data)	N/a (product with insufficient stage-level data)	N/a (product with insufficient stage-level data)	None
22322-4-2014	2014	No	Glass container	355ml carbonated beverage container from North America	Owens-Illinois	USA	Materials	Containers & Packaging	Packaging for consumer goods	0.416	Estimated from external data based on product description	0.171	0.41	ISO	(not reported by company)	N/a	N/a (no previous data available)	N/a (product with insufficient stage-level data)	N/a (product with insufficient stage-level data)	N/a (product with insufficient stage-level data)	N/a (product with insufficient stage-level data)	N/a (product with insufficient stage-level data)	N/a (product with insufficient stage-level data)	None
22379-1-2014	2014	Yes	BillerudKorsnäs Liquid LC	Liquid Packaging Board with the grammages of 272 and 280 aimed for converting to beverage cartons.	BillerudKorsnäs	Sweden	Materials	Containers & Packaging	Packaging for consumer goods	1000	As per company's submission to CDP	407	0.41	ISO	-0.049	The overall decrease is mainly thanks to changes in lower grammages and less fossil fuel in the manufacturing processes (Scope 1). At the same time, due to a calculation based on a production on two different sites instead of one, the emissions from the production of chemicals (Scope 3) had a negative change during 2012 compared to the previous figures from 2008 (published in 2011).	Product carbon efficiency changed	No	0.694	0.097	0.209	0.209	(included in downstream but not reported separately)	None
22379-1-2015	2015	Yes	BillerudKorsnäs Liquid LC	Liquid Packaging Board with the grammages of 272 and 280 aimed for converting to beverage cartons.	BillerudKorsnäs	Sweden	Containers & Packaging	Not used for 2015 reporting	Packaging for consumer goods	1000	As per company's submission to CDP	407	0.41	ISO	-0.049	The overall decrease was mainly thanks to changes in lower grammages and less fossil fuel in the manufacturing processes (Scope 1). At the same time, due to a calculation based on a production on two different sites instead of one, the emissions from the production of chemicals (Scope 3) had a negative change during 2012 compared to the previous figures from 2008 (published in 2011).	Product carbon efficiency changed	No	0.694	0.097	0.209	0.209	(included in downstream but not reported separately)	None
22645-1-2013	2013	Yes	TFT-LCD products is the use of the optical properties of liquid crystals to achieve the image display, liquid crystal main structure is poured into the vacuum between the two pieces of glass, glass, applied voltage and control the proper spacing of the deflection characteristics of the incident light can be changed to to image display. For the automobile products's TFT-LCD Module, the product is …	TFT-LCD products is the use of the optical properties of liquid crystals to achieve the image display, liquid crystal main structure is poured into the vacuum between the two pieces of glass, glass, applied voltage and control the proper spacing of the deflection characteristics of the incident light can be changed to to image display. For the automobile products's TFT-LCD Module, the product is …	Chunghwa Picture Tubes Ltd	Taiwan	Technology Hardware & Equipment	Electronic Equipment, Instruments & Components	Computer, IT & telecom	0.28	Estimated from external data based on product description	12	42.86	ISO	-0.5	Materials: No changes Process aspects; The suppliers reduced carbon emissions with optimized the process. 2011 product used SF6 as process gas. 2012 product used NF3 to replace SF6 as process gas to reduce the CO2 emission.	Product carbon efficiency changed	No	0.57	0.32	0.11	0.11	(included in downstream but not reported separately)	None
22710-1-2014	2014	Yes	Coca-Cola (all packaging and sizes)	Coca-Cola soft drink	Coca-Cola HBC AG	Switzerland	Food, Beverage & Tobacco	Beverages	Food & Beverage	1.093	As per company's submission to CDP	0.1673	0.15	GHGP	(not reported by company)	N/a	N/a (no previous data available)	No	0.8428	0.1112	0.046	0.0418	(included in downstream but not reported separately)	Country corrected from "Greece" to "Switzerland"
22710-1-2015	2015	Yes	Coca-Cola (all packaging and sizes)	Coca-Cola soft drink (carbonated non-alcoholic beverage)	Coca-Cola HBC AG	Switzerland	Food & Beverage Processing	Not used for 2015 reporting	Food & Beverage	1.093	As per company's submission to CDP	0.158	0.14	GHGP	-0.054	Our reduction activities in the whole value chain.	Product carbon efficiency changed	No	0.3837	0.1271	0.4893	0.4823	(included in downstream but not reported separately)	None
22710-1-2016	2016	Yes	Coca-Cola (all packaging and sizes)	Coca-Cola soft drink (carbonated non-alcoholic beverage)	Coca-Cola HBC AG	Switzerland	Food, Beverage & Tobacco	Beverages	Food & Beverage	1.093	Estimated from external data based on product description	0.147	0.13	GHGP	-0.015	Our reduction activities in the whole value chain.	Product carbon efficiency changed	No	0.4217	0.1098	0.4685	0.4624	(included in downstream but not reported separately)	None
22917-2-2015	2015	No	Wind Turbine G90 2 Megawats	Cradle to grave emissions of a Wind Turbine G90 2 Megawats	Gamesa Corporación Tecnológica, S.A.	Spain	Electrical Equipment and Machinery	Not used for 2015 reporting	Comm. equipm. & capital goods	361000	Estimated from external data based on product description	1251625	3.47	ISO	-0.04	New EPD revision including product changes introduced on last two years. Emissions have decreased 4% from previos EPD verified at year 2013	Product carbon efficiency changed	N/a (product with insufficient stage-level data)	N/a (product with insufficient stage-level data)	N/a (product with insufficient stage-level data)	N/a (product with insufficient stage-level data)	N/a (product with insufficient stage-level data)	N/a (product with insufficient stage-level data)	None
22917-3-2015	2015	No	Wind Turbine G114 2 Megawats	Cradle to grave emissions of a Wind Turbine G114 2 Megawats. Tower 93 m3ters	Gamesa Corporación Tecnológica, S.A.	Spain	Electrical Equipment and Machinery	Not used for 2015 reporting	Comm. equipm. & capital goods	400000	Estimated from external data based on product description	1532608	3.83	ISO	(not reported by company)	N/a	N/a (no previous data available)	N/a (product with insufficient stage-level data)	N/a (product with insufficient stage-level data)	N/a (product with insufficient stage-level data)	N/a (product with insufficient stage-level data)	N/a (product with insufficient stage-level data)	N/a (product with insufficient stage-level data)	None
22917-4-2015	2015	No	Wind Turbine G128 5 Megawats	Cradle to grave emissions of a Wind Turbine G128 5 Megawats. Hibrid tower 140 meters	Gamesa Corporación Tecnológica, S.A.	Spain	Electrical Equipment and Machinery	Not used for 2015 reporting	Comm. equipm. & capital goods	600000	Estimated from external data based on product description	3718044	6.2	ISO	(not reported by company)	N/a	N/a (no previous data available)	N/a (product with insufficient stage-level data)	N/a (product with insufficient stage-level data)	N/a (product with insufficient stage-level data)	N/a (product with insufficient stage-level data)	N/a (product with insufficient stage-level data)	N/a (product with insufficient stage-level data)	None
22917-5-2015	2015	No	Wind Turbine G132 5 Megawats	Cradle to grave emissions of a Wind Turbine G132 5 Megawats. Metallic tower of 95 meters	Gamesa Corporación Tecnológica, S.A.	Spain	Electrical Equipment and Machinery	Not used for 2015 reporting	Comm. equipm. & capital goods	600000	Estimated from external data based on product description	3276187	5.46	Not reported	(not reported by company)	N/a	N/a (no previous data available)	N/a (product with insufficient stage-level data)	N/a (product with insufficient stage-level data)	N/a (product with insufficient stage-level data)	N/a (product with insufficient stage-level data)	N/a (product with insufficient stage-level data)	N/a (product with insufficient stage-level data)	None
23195-10-2013	2013	Yes	HP EliteDisplay E201 20-inch LED Backlit Monitor	Field not included in 2013 data	Hewlett-Packard	USA	Technology Hardware & Equipment	Computers & Peripherals	Computer, IT & telecom	7.1	Estimated from external data based on product description	300	42.25	MIT PAIA	(not reported by company)	N/a	N/a (no previous data available)	No	0.0083	0.469	0.5228	0.0172	0.0112	None
23195-11-2013	2013	Yes	HP Compaq LA2206xc 21.5-inch Webcam Monitor	Field not included in 2013 data	Hewlett-Packard	USA	Technology Hardware & Equipment	Computers & Peripherals	Computer, IT & telecom	8.3	Estimated from external data based on product description	380	45.78	MIT PAIA	(not reported by company)	N/a	N/a (no previous data available)	No	0.0086	0.4306	0.5608	0.0182	0.0117	None
23195-1-2013	2013	No	HP LaserJet Enterprise M4555fskm MFP (note that this product is representative of 61 similar products for which full LCAs were performed)	HP LaserJet Enterprise M4555fskm MFP (note that this product is representative of 61 similar products for which full LCAs were performed)	Hewlett-Packard	USA	Technology Hardware & Equipment	Computers & Peripherals	Computer, IT & telecom	52.5	Estimated from external data based on product description	16100	306.67	ISO	(not reported by company)	N/a	N/a (no previous data available)	N/a (product with insufficient stage-level data)	N/a (product with insufficient stage-level data)	N/a (product with insufficient stage-level data)	N/a (product with insufficient stage-level data)	N/a (product with insufficient stage-level data)	N/a (product with insufficient stage-level data)	LCA Stage "end-of-life" indicated negative emissions, changed emissions to a negative number
23195-12-2013	2013	Yes	HP Compaq LA2405x 24-inch LED Backlit Monitor	Field not included in 2013 data	Hewlett-Packard	USA	Technology Hardware & Equipment	Computers & Peripherals	Computer, IT & telecom	10.1	Estimated from external data based on product description	460	45.54	MIT PAIA	(not reported by company)	N/a	N/a (no previous data available)	No	0.0104	0.3832	0.6063	0.0187	0.0098	None
23195-2-2013	2013	No	HP Envy 120 InkJet Printer	Field not included in 2013 data	Hewlett-Packard	USA	Technology Hardware & Equipment	Computers & Peripherals	Computer, IT & telecom	7.2	Estimated from external data based on product description	231.4	32.14	ISO	(not reported by company)	N/a	N/a (no previous data available)	N/a (product with insufficient stage-level data)	N/a (product with insufficient stage-level data)	N/a (product with insufficient stage-level data)	N/a (product with insufficient stage-level data)	N/a (product with insufficient stage-level data)	N/a (product with insufficient stage-level data)	LCA Stage "end-of-life" indicated negative emissions, changed emissions to a negative number
23195-3-2013	2013	Yes	HP ScanJet 7500 (note that this product is representative of 5 similar products for which full LCAs were performed)	HP ScanJet 7500 (note that this product is representative of 5 similar products for which full LCAs were performed)	Hewlett-Packard	USA	Technology Hardware & Equipment	Computers & Peripherals	Computer, IT & telecom	10.61	Estimated from external data based on product description	262.1	24.7	ISO	(not reported by company)	N/a	N/a (no previous data available)	Yes	0.345	0.1316	0.5235	(included in up/downstream but not reported separately)	(included in downstream but not reported separately)	Sum of LCA emissions were a factor of 1000 smaller than the total emissions figure, LCA stage emissions were multiplied by 1000; one LCA Stage indicated negative emissions, changed emissions for that stage to a negative number
23195-4-2013	2013	Yes	HP Compaq Elite 8300 USDT PC	Field not included in 2013 data	Hewlett-Packard	USA	Technology Hardware & Equipment	Computers & Peripherals	Computer, IT & telecom	3.1	Estimated from external data based on product description	420	135.48	MIT PAIA	(not reported by company)	N/a	N/a (no previous data available)	No	0.0052	0.3638	0.631	0.0176	0.0048	None
23195-5-2013	2013	Yes	HP Compaq 8200 Elite SFF Business PC	Field not included in 2013 data	Hewlett-Packard	USA	Technology Hardware & Equipment	Computers & Peripherals	Computer, IT & telecom	7.6	Estimated from external data based on product description	500	65.79	MIT PAIA	(not reported by company)	N/a	N/a (no previous data available)	No	0.0077	0.3323	0.66	0.0369	0.0109	None
23195-6-2013	2013	Yes	HP Compaq Elite 8300 MT PC	Field not included in 2013 data	Hewlett-Packard	USA	Technology Hardware & Equipment	Computers & Peripherals	Computer, IT & telecom	11.2	Estimated from external data based on product description	580	51.79	MIT PAIA	(not reported by company)	N/a	N/a (no previous data available)	No	0.0075	0.2692	0.7233	0.0304	0.0104	None
23195-7-2013	2013	Yes	HP EliteBook Folio 9470m	Field not included in 2013 data	Hewlett-Packard	USA	Technology Hardware & Equipment	Computers & Peripherals	Computer, IT & telecom	1.61	Estimated from external data based on product description	230	142.86	MIT PAIA	(not reported by company)	N/a	N/a (no previous data available)	No	0.0047	0.7666	0.2287	0.0784	0.0043	None
23195-8-2013	2013	Yes	HP EliteBook 8460p Notebook PC	Field not included in 2013 data	Hewlett-Packard	USA	Technology Hardware & Equipment	Computers & Peripherals	Computer, IT & telecom	2.25	Estimated from external data based on product description	290	128.89	MIT PAIA	(not reported by company)	N/a	N/a (no previous data available)	No	0.0059	0.6252	0.3689	0.0986	0.0059	None
23195-9-2013	2013	Yes	HP EliteBook 8570w Mobile Workstation	Field not included in 2013 data	Hewlett-Packard	USA	Technology Hardware & Equipment	Computers & Peripherals	Computer, IT & telecom	3	Estimated from external data based on product description	370	123.33	MIT PAIA	(not reported by company)	N/a	N/a (no previous data available)	No	0.0024	0.6908	0.3068	0.0748	0.0049	None
23634-10-2016	2016	No	Canvas Wood Lateral	Office Storage	Herman Miller	USA	Consumer Durables & Apparel	Household Durables	Home durables, textiles, & equipment	70.2	Estimated from external data based on product description	54	0.77	TRACI 2.1	(not reported by company)	N/a	N/a (no previous data available)	N/a (product with insufficient stage-level data)	N/a (product with insufficient stage-level data)	N/a (product with insufficient stage-level data)	N/a (product with insufficient stage-level data)	N/a (product with insufficient stage-level data)	N/a (product with insufficient stage-level data)	None
23634-11-2016	2016	No	Canvas Wood Pedestal 2016	Office Storage	Herman Miller	USA	Consumer Durables & Apparel	Household Durables	Home durables, textiles, & equipment	88.7	Estimated from external data based on product description	77	0.87	TRACI 2.1	(not reported by company)	N/a	N/a (no previous data available)	N/a (product with insufficient stage-level data)	N/a (product with insufficient stage-level data)	N/a (product with insufficient stage-level data)	N/a (product with insufficient stage-level data)	N/a (product with insufficient stage-level data)	N/a (product with insufficient stage-level data)	None
23634-1-2015	2015	No	Embody Chair	Office Seating	Herman Miller	USA	Consumer Durables, Household and Personal Products	Not used for 2015 reporting	Home durables, textiles, & equipment	23.59	Estimated from external data based on product description	98	4.15	TRACI 2.1	(not reported by company)	N/a	N/a (no previous data available)	N/a (product with insufficient stage-level data)	N/a (product with insufficient stage-level data)	N/a (product with insufficient stage-level data)	N/a (product with insufficient stage-level data)	N/a (product with insufficient stage-level data)	N/a (product with insufficient stage-level data)	None
23634-1-2016	2016	No	Embody Chair	Office Seating	Herman Miller	USA	Consumer Durables & Apparel	Household Durables	Home durables, textiles, & equipment	23.59	Estimated from external data based on product description	98	4.15	TRACI 2.1	(not reported by company)	N/a	N/a (no previous data available)	N/a (product with insufficient stage-level data)	N/a (product with insufficient stage-level data)	N/a (product with insufficient stage-level data)	N/a (product with insufficient stage-level data)	N/a (product with insufficient stage-level data)	N/a (product with insufficient stage-level data)	None
23634-12-2016	2016	No	Canvas Wood Tower	Office Storage	Herman Miller	USA	Consumer Durables & Apparel	Household Durables	Home durables, textiles, & equipment	107	Estimated from external data based on product description	43	0.4	TRACI 2.1	(not reported by company)	N/a	N/a (no previous data available)	N/a (product with insufficient stage-level data)	N/a (product with insufficient stage-level data)	N/a (product with insufficient stage-level data)	N/a (product with insufficient stage-level data)	N/a (product with insufficient stage-level data)	N/a (product with insufficient stage-level data)	None
23634-13-2016	2016	No	New Aeron Chair	Office Seating	Herman Miller	USA	Consumer Durables & Apparel	Household Durables	Home durables, textiles, & equipment	19.323	Estimated from external data based on product description	87	4.5	TRACI 2.1	(not reported by company)	N/a	N/a (no previous data available)	N/a (product with insufficient stage-level data)	N/a (product with insufficient stage-level data)	N/a (product with insufficient stage-level data)	N/a (product with insufficient stage-level data)	N/a (product with insufficient stage-level data)	N/a (product with insufficient stage-level data)	None
23634-2-2015	2015	No	Caper Stacking Chair	Office Seating	Herman Miller	USA	Consumer Durables, Household and Personal Products	Not used for 2015 reporting	Home durables, textiles, & equipment	9.53	Estimated from external data based on product description	26	2.73	TRACI 2.1	(not reported by company)	N/a	N/a (no previous data available)	N/a (product with insufficient stage-level data)	N/a (product with insufficient stage-level data)	N/a (product with insufficient stage-level data)	N/a (product with insufficient stage-level data)	N/a (product with insufficient stage-level data)	N/a (product with insufficient stage-level data)	None
23634-2-2016	2016	No	Caper Stacking Chair	Office Seating	Herman Miller	USA	Consumer Durables & Apparel	Household Durables	Home durables, textiles, & equipment	9.53	Estimated from external data based on product description	26	2.73	TRACI 2.1	(not reported by company)	N/a	N/a (no previous data available)	N/a (product with insufficient stage-level data)	N/a (product with insufficient stage-level data)	N/a (product with insufficient stage-level data)	N/a (product with insufficient stage-level data)	N/a (product with insufficient stage-level data)	N/a (product with insufficient stage-level data)	None
23634-3-2015	2015	No	Aeron Chair	Office Seating	Herman Miller	USA	Consumer Durables, Household and Personal Products	Not used for 2015 reporting	Home durables, textiles, & equipment	24.95	Estimated from external data based on product description	91	3.65	TRACI 2.1	(not reported by company)	N/a	N/a (no previous data available)	N/a (product with insufficient stage-level data)	N/a (product with insufficient stage-level data)	N/a (product with insufficient stage-level data)	N/a (product with insufficient stage-level data)	N/a (product with insufficient stage-level data)	N/a (product with insufficient stage-level data)	None
23634-3-2016	2016	No	Aeron Chair	Office Seating	Herman Miller	USA	Consumer Durables & Apparel	Household Durables	Home durables, textiles, & equipment	24.95	Estimated from external data based on product description	98	3.93	TRACI 2.1	(not reported by company)	N/a	N/a (no previous data available)	N/a (product with insufficient stage-level data)	N/a (product with insufficient stage-level data)	N/a (product with insufficient stage-level data)	N/a (product with insufficient stage-level data)	N/a (product with insufficient stage-level data)	N/a (product with insufficient stage-level data)	None
23634-4-2015	2015	No	Mirra 2 Chair	Office Seating	Herman Miller	USA	Consumer Durables, Household and Personal Products	Not used for 2015 reporting	Home durables, textiles, & equipment	19.05	Estimated from external data based on product description	105	5.51	TRACI 2.1	(not reported by company)	N/a	N/a (no previous data available)	N/a (product with insufficient stage-level data)	N/a (product with insufficient stage-level data)	N/a (product with insufficient stage-level data)	N/a (product with insufficient stage-level data)	N/a (product with insufficient stage-level data)	N/a (product with insufficient stage-level data)	None
23634-4-2016	2016	No	Mirra 2 Chair	Office Seating	Herman Miller	USA	Consumer Durables & Apparel	Household Durables	Home durables, textiles, & equipment	19.05	Estimated from external data based on product description	105	5.51	TRACI 2.1	(not reported by company)	N/a	N/a (no previous data available)	N/a (product with insufficient stage-level data)	N/a (product with insufficient stage-level data)	N/a (product with insufficient stage-level data)	N/a (product with insufficient stage-level data)	N/a (product with insufficient stage-level data)	N/a (product with insufficient stage-level data)	None
23634-5-2015	2015	No	Sayl Work Chair, Suspension Back	Office Seating	Herman Miller	USA	Consumer Durables, Household and Personal Products	Not used for 2015 reporting	Home durables, textiles, & equipment	17.24	Estimated from external data based on product description	82	4.76	TRACI 2.1	(not reported by company)	N/a	N/a (no previous data available)	N/a (product with insufficient stage-level data)	N/a (product with insufficient stage-level data)	N/a (product with insufficient stage-level data)	N/a (product with insufficient stage-level data)	N/a (product with insufficient stage-level data)	N/a (product with insufficient stage-level data)	None
23634-5-2016	2016	No	Sayl Work Chair, Suspension Back	Office Seating	Herman Miller	USA	Consumer Durables & Apparel	Household Durables	Home durables, textiles, & equipment	17.24	Estimated from external data based on product description	82	4.76	TRACI 2.1	(not reported by company)	N/a	N/a (no previous data available)	N/a (product with insufficient stage-level data)	N/a (product with insufficient stage-level data)	N/a (product with insufficient stage-level data)	N/a (product with insufficient stage-level data)	N/a (product with insufficient stage-level data)	N/a (product with insufficient stage-level data)	None
23634-6-2015	2015	No	Setu Multipurpose Chair with Lyris 2	Office Seating	Herman Miller	USA	Consumer Durables, Household and Personal Products	Not used for 2015 reporting	Home durables, textiles, & equipment	7.71	Estimated from external data based on product description	48	6.23	TRACI 2.1	(not reported by company)	N/a	N/a (no previous data available)	N/a (product with insufficient stage-level data)	N/a (product with insufficient stage-level data)	N/a (product with insufficient stage-level data)	N/a (product with insufficient stage-level data)	N/a (product with insufficient stage-level data)	N/a (product with insufficient stage-level data)	None
23634-6-2016	2016	No	Setu Multipurpose chair with Lyris 2	Office Seating	Herman Miller	USA	Consumer Durables & Apparel	Household Durables	Home durables, textiles, & equipment	7.71	Estimated from external data based on product description	48	6.23	TRACI 2.1	(not reported by company)	N/a	N/a (no previous data available)	N/a (product with insufficient stage-level data)	N/a (product with insufficient stage-level data)	N/a (product with insufficient stage-level data)	N/a (product with insufficient stage-level data)	N/a (product with insufficient stage-level data)	N/a (product with insufficient stage-level data)	None
23634-7-2015	2015	No	Celle Chair	Office Seating	Herman Miller	USA	Consumer Durables, Household and Personal Products	Not used for 2015 reporting	Home durables, textiles, & equipment	24.95	Estimated from external data based on product description	72	2.89	TRACI 2.1	(not reported by company)	N/a	N/a (no previous data available)	N/a (product with insufficient stage-level data)	N/a (product with insufficient stage-level data)	N/a (product with insufficient stage-level data)	N/a (product with insufficient stage-level data)	N/a (product with insufficient stage-level data)	N/a (product with insufficient stage-level data)	None
23634-7-2016	2016	No	Celle Chair	Office Seating	Herman Miller	USA	Consumer Durables & Apparel	Household Durables	Home durables, textiles, & equipment	24.95	Estimated from external data based on product description	72	2.89	TRACI 2.1	(not reported by company)	N/a	N/a (no previous data available)	N/a (product with insufficient stage-level data)	N/a (product with insufficient stage-level data)	N/a (product with insufficient stage-level data)	N/a (product with insufficient stage-level data)	N/a (product with insufficient stage-level data)	N/a (product with insufficient stage-level data)	None
23634-8-2016	2016	No	Aeron Work Stool	Office Seating	Herman Miller	USA	Consumer Durables & Apparel	Household Durables	Home durables, textiles, & equipment	34.93	Estimated from external data based on product description	102	2.92	TRACI 2.1	(not reported by company)	N/a	N/a (no previous data available)	N/a (product with insufficient stage-level data)	N/a (product with insufficient stage-level data)	N/a (product with insufficient stage-level data)	N/a (product with insufficient stage-level data)	N/a (product with insufficient stage-level data)	N/a (product with insufficient stage-level data)	None
23634-9-2016	2016	No	Canvas Wood Credenza 2016	Office Storage	Herman Miller	USA	Consumer Durables & Apparel	Household Durables	Home durables, textiles, & equipment	99.5	Estimated from external data based on product description	76	0.76	TRACI 2.1	(not reported by company)	N/a	N/a (no previous data available)	N/a (product with insufficient stage-level data)	N/a (product with insufficient stage-level data)	N/a (product with insufficient stage-level data)	N/a (product with insufficient stage-level data)	N/a (product with insufficient stage-level data)	N/a (product with insufficient stage-level data)	None
2377-1-2014	2014	Yes	Graphite 2500 DECT	A Digital Enhanced Cordless Telecommunications (DECT) phone	BT Group	United Kingdom	Telecommunication Services	Diversified Telecommunication Services	Computer, IT & telecom	1.4	Estimated from external data based on product description	4.7	3.36	GHGP	(not reported by company)	N/a	N/a (no %change reported)	No	0.1923	0.0299	0.7778	0.0171	0.0107	None
2377-1-2015	2015	Yes	Graphite 2500 DECT	A Digital Enhanced Cordless Telecommunications (DECT) phone	BT Group	United Kingdom	Telecommunication Services	Not used for 2015 reporting	Computer, IT & telecom	1.4	Estimated from external data based on product description	4.7	3.36	GHGP	(not reported by company)	N/a	N/a (no %change reported)	No	0.1923	0.0299	0.7778	0.0171	0.0107	None
2377-2-2014	2014	Yes	Home Hub 2.0	A wireless gateway router providing wireless internet access in domestic properties (a final product).	BT Group	United Kingdom	Telecommunication Services	Diversified Telecommunication Services	Computer, IT & telecom	1.1	Estimated from external data based on product description	57	51.82	Not reported	(not reported by company)	N/a	N/a (no %change reported)	No	0.1201	0.0037	0.8762	0.0014	0.0018	None
2377-2-2015	2015	Yes	Home Hub 2.0	A wireless gateway router providing wireless internet access in domestic properties (a final product).	BT Group	United Kingdom	Telecommunication Services	Not used for 2015 reporting	Computer, IT & telecom	1.1	Estimated from external data based on product description	57	51.82	Not reported	(not reported by company)	N/a	N/a (no %change reported)	No	0.1186	0.0037	0.8778	0.0141	0.0017	None
2377-3-2014	2014	Yes	Home Hub 3.0	A wireless gateway router providing wireless internet access in domestic properties (a final product).	BT Group	United Kingdom	Telecommunication Services	Diversified Telecommunication Services	Computer, IT & telecom	1.2	Estimated from external data based on product description	33	27.5	Not reported	(not reported by company)	N/a	N/a (no %change reported)	No	0.0688	0.0107	0.9205	0.0031	0.0031	None
2377-3-2015	2015	Yes	Home Hub 3.0	A wireless gateway router providing wireless internet access in domestic properties (a final product).	BT Group	United Kingdom	Telecommunication Services	Not used for 2015 reporting	Computer, IT & telecom	1.2	Estimated from external data based on product description	33	27.5	Not reported	(not reported by company)	N/a	N/a (no %change reported)	No	0.0688	0.0107	0.9205	0.0031	0.0031	None
2377-4-2014	2014	Yes	Vision+ box	A Freeview box and digital TV recorder in a single unit	BT Group	United Kingdom	Telecommunication Services	Diversified Telecommunication Services	Computer, IT & telecom	1.7	Estimated from external data based on product description	88	51.76	Not reported	(not reported by company)	N/a	N/a (no %change reported)	No	0.1123	0.0005	0.8872	0.0128	0.0027	None
2377-4-2015	2015	Yes	Vision+ box	A Freeview box and digital TV recorder in a single unit	BT Group	United Kingdom	Telecommunication Services	Not used for 2015 reporting	Computer, IT & telecom	1.7	Estimated from external data based on product description	88	51.76	Not reported	(not reported by company)	N/a	N/a (no %change reported)	No	0.1123	0.0005	0.8872	0.0128	0.0027	None
2555-1-2014	2014	No	Carbon Black	Metric ton of carbon black (all grades produced at all manufacturing locations)	Cabot Corporation	USA	Materials	Chemicals	Chemicals	1000	As per company's submission to CDP	2280	2.28	GHGP	(not reported by company)	N/a	N/a (no %change reported)	N/a (product with insufficient stage-level data)	N/a (product with insufficient stage-level data)	N/a (product with insufficient stage-level data)	N/a (product with insufficient stage-level data)	N/a (product with insufficient stage-level data)	N/a (product with insufficient stage-level data)	None
2688-1-2014	2014	Yes	Multi Function Printer	Canon Multi Function Printers produce easily copy, scan and print important documents in a convenient, easy to use machine.	Canon Inc.	Japan	Technology Hardware & Equipment	Office Electronics	Computer, IT & telecom	71	Estimated from external data based on product description	39	0.55	M. Env. Japan	-0.09	The result of promoting the following activities mainly; 1. A smaller, lighter PIXMA series and reduced packaging size helps cut down CO2 emissions throughout the whole process from production, shipping to selling 2. Low-power-consumption design achieved by LED light source 3. Reduction electricity consumption 4. Equipped with Eco mode, such as automatic duplex printing and power-off timers that …	Product carbon efficiency changed	Yes	0.5585	0.213	0.2286	0.0338	0.0935	None
2688-2-2014	2014	Yes	Multi Function Printer with a built-in facsimile	Canon Multi Function Printers produce easily copy, scan, fax and print important documents in a convenient, easy to use machine.	Canon Inc.	Japan	Technology Hardware & Equipment	Office Electronics	Computer, IT & telecom	30.98	Estimated from external data based on product description	57	1.84	M. Env. Japan	-0.05	The result of promoting the following activities mainly; 1. A smaller, lighter PIXMA series and reduced packaging size helps cut down CO2 emissions throughout the whole process from production, shipping to selling 2. Low-power-consumption design achieved by LED light source 3. Reduction electricity consumption 4. Equipped with Eco mode, such as automatic duplex printing and power-off timers that …	Product carbon efficiency changed	Yes	0.5652	0.2155	0.2193	0.0228	0.114	None
2688-3-2014	2014	Yes	Digital camera	Shoot high-quality digital photos with Canon PowerShot digital cameras. Canon PowerShot cameras offer the best in digital camera technology, style and ease of use. Canon's optics, DIGIC processor and stunning design make PowerShot digital cameras the best choice for photographers at any level.	Canon Inc.	Japan	Technology Hardware & Equipment	Office Electronics	Computer, IT & telecom	0.553	Estimated from external data based on product description	13	23.51	M. Env. Japan	0.02	The result of promoting the following activities mainly; Promoting Modal Shifts from road and air transportation to a combination of ocean and rail, which have a lower environmental impact. However, on the decrease of our production, CO2 emissions from fixed sources per unit increased.	Product carbon efficiency changed	Yes	0.6381	0.2434	0.1185	0.0889	0.0222	None
2688-4-2014	2014	Yes	Single Lens Reflex camera system	The Canon EOS Camera System is the most complete Single Lens Reflex (SLR) camera system in the world. Whether you are a beginner or advanced professional looking for a digital camera, the EOS System takes your photography to the next level.	Canon Inc.	Japan	Technology Hardware & Equipment	Office Electronics	Computer, IT & telecom	1.53	Estimated from external data based on product description	19	12.42	M. Env. Japan	-0.03	The result of promoting the following activities mainly; Promoting Modal Shifts from road and air transportation to a combination of ocean and rail, which have a lower environmental impact.	Product carbon efficiency changed	Yes	0.5739	0.2189	0.2073	0.1813	0.0207	None
2802-1-2013	2013	No	Ingeo--biopolymer (polylactid) made from corn starch	Ingeo--biopolymer (polylactid) made from corn starch	Cargill	USA	Food, Beverage & Tobacco	Food Products	Food & Beverage	1	As per company's submission to CDP	1.3	1.3	ISO	(not reported by company)	N/a	N/a (no %change reported)	N/a (product with insufficient stage-level data)	N/a (product with insufficient stage-level data)	N/a (product with insufficient stage-level data)	N/a (product with insufficient stage-level data)	N/a (product with insufficient stage-level data)	N/a (product with insufficient stage-level data)	None
2802-1-2014	2014	No	Ingeo	Ingeo--biopolymer (polylactid) made from corn starch	Cargill	USA	Food, Beverage & Tobacco	Food Products	Food & Beverage	1	As per company's submission to CDP	1.3	1.3	ISO	(not reported by company)	N/a	N/a (no %change reported)	N/a (product with insufficient stage-level data)	N/a (product with insufficient stage-level data)	N/a (product with insufficient stage-level data)	N/a (product with insufficient stage-level data)	N/a (product with insufficient stage-level data)	N/a (product with insufficient stage-level data)	None
28843-1-2013	2013	Yes	Series 29 Hydrant - Squat Hydrant suitable for use with water and neutral liquids, to a maximum temperature of 70 degrees centigrade. Complies with requirements of BS750:2006 and BSEN1074-2:2004 and EN14339:2005, underground hydrants. Also to BS EN 1074-6 for potable (drinking) water. This product has kitemark and WRAS approval. The 2938832112 replaces the 2928832112.	Series 29 Hydrant - Squat Hydrant suitable for use with water and neutral liquids, to a maximum temperature of 70 degrees centigrade. Complies with requirements of BS750:2006 and BSEN1074-2:2004 and EN14339:2005, underground hydrants. Also to BS EN 1074-6 for potable (drinking) water. This product has kitemark and WRAS approval. The 2938832112 replaces the 2928832112.	AVK	United Kingdom	Capital Goods	Trading Companies & Distributors	Comm. equipm. & capital goods	13	Estimated from external data based on product description	31.33	2.41	PAS2050	0.1836	Previously AVK brought in the bodies and machined them in house. This arrangement has now changed and the bodies are brought in ready machined. The effect of this is a large rise in the emissions from supplier components. In addition the amount of CO2e emissions per valve has increased because the amount of emissions allocated to each valve is by weight of the product. The total number of product…	Model/parameters AND product carbon efficiency changed	No	0.3938	0.5685	0.0377	0.0377	(included in downstream but not reported separately)	None
28843-1-2014	2014	Yes	Series 29/388 Squat Hydrant	The series 29 Squat Hydrant is suitable for use with water and neutral liquids, to a maximum temperature of 70 degrees centigrade. This product complies with requirements of BS750:2006 and BSEN1074-2:2004 and EN14339:2005, underground hydrants. Also to BS EN 1074-6 for potable (drinking) water. This product has kitemark and WRAS approval. The 2938832112 replaces the 2928832112.	AVK	United Kingdom	Capital Goods	Trading Companies & Distributors	Comm. equipm. & capital goods	13	Estimated from external data based on product description	30.05	2.31	PAS2050	-0.041	The value recorded this year was slightly lower than the previously recorded value. This is due to improvements made to the method by which life-cycle emissions are calculated (using emission factors that more accurately reflect all of the components that make up the product).	Model and/or parameters changed (but not product)	No	0.9764	0.0013	0.0222	0.0199	0.0023	None
28843-2-2013	2013	Yes	The series 21/75 is a resilient seat, wedge gate valve for isolation purposes, suitable for use with water and neutral liquids (sewage), to a maximum temperature of +70 degrees centegrade. The series 21/75 is a new alternative to a series 21/50 in some applications. Therefore where a 21/75 is sold we can calculate the emissions saved in contrast to the sale of a 21/50.	The series 21/75 is a resilient seat, wedge gate valve for isolation purposes, suitable for use with water and neutral liquids (sewage), to a maximum temperature of +70 degrees centegrade. The series 21/75 is a new alternative to a series 21/50 in some applications. Therefore where a 21/75 is sold we can calculate the emissions saved in contrast to the sale of a 21/50.	AVK	United Kingdom	Capital Goods	Trading Companies & Distributors	Comm. equipm. & capital goods	41	Estimated from external data based on product description	94.08	2.29	PAS2050	0.1909	The total number of AVK manufactured products has decreased in the reporting year, therefore more emissions have increased significantly at the "Manufacture of AVK finished components" stage of the lifecycle. An increase of emissions is also observed at the "Assembly and finishing of product" stage of the lifecycle. This is the result of a change in methodology to allocate the Scope 1 and 2 by we…	Model/parameters AND product carbon efficiency changed	No	0.4525	0.4695	0.078	0.078	(included in downstream but not reported separately)	None
28843-3-2013	2013	Yes	Gas Product - Small 555 series cast iron softseal valve, PN16. This series 555 softseal valve is a double-faced, resilient seat wedge gate valve. It is designed primarily for the isolation of natural gas and towns gas. Kitemark approved for GIS/V7 part 1.	Gas Product - Small 555 series cast iron softseal valve, PN16. This series 555 softseal valve is a double-faced, resilient seat wedge gate valve. It is designed primarily for the isolation of natural gas and towns gas. Kitemark approved for GIS/V7 part 1.	AVK	United Kingdom	Capital Goods	Trading Companies & Distributors	Comm. equipm. & capital goods	23	Estimated from external data based on product description	44.27	1.92	PAS2050	-0.0372	A reduction of emissions is observed at the "Assembly and finishing of product" stage of the lifecycle. This is the result of a reduction in scope 1 and 2 emissions at Bryan Donkin Valves Ltd where this product is assembled.	Product carbon efficiency changed	No	0.7207	0.1708	0.1084	0.1084	(included in downstream but not reported separately)	None
28843-3-2014	2014	Yes	Series 555/300 Gate Valve	The series 555 cast iron softseal valve, PN16, is a double-faced, resilient seat wedge gate valve. It is designed primarily for the isolation of natural gas and towns gas. Kitemark approved for GIS/V7 part 1.	AVK	United Kingdom	Capital Goods	Trading Companies & Distributors	Comm. equipm. & capital goods	23	Estimated from external data based on product description	33.44	1.45	PAS2050	-0.2447	The value recorded this year was lower than the previously recorded value. This is due to improvements made to the method by which life-cycle emissions are calculated (using emission factors that more accurately reflect all of the components that make up the product).	Model and/or parameters changed (but not product)	No	0.9948	0.0009	0.0043	0.0021	0.0021	None
28843-4-2014	2014	Yes	Series 21/50 Gate Valve	The series 21/50 is a resilient seat gate valve to BS EN 1074-2 / BS 5163-1,(ductile iron) for isolation purposes, suitable for use with water and neutral liquids (sewage) to a maximum temperature of up to +70°C.	AVK	United Kingdom	Capital Goods	Trading Companies & Distributors	Comm. equipm. & capital goods	41	Estimated from external data based on product description	62.63	1.53	PAS2050	-0.3343	The value recorded this year was lower than the previously recorded value. This is due to improvements made to the method by which life-cycle emissions are calculated (using emission factors that more accurately reflect all of the components that make up the product).	Model and/or parameters changed (but not product)	No	0.9785	0.0005	0.0211	0.0199	0.0011	None
28843-5-2014	2014	Yes	Series 202/31 Repair Clamp	The series 202/31 Supacollar is a multiple band repair clamp, for all ferrous pipes, PVC and AC.	AVK	United Kingdom	Capital Goods	Trading Companies & Distributors	Comm. equipm. & capital goods	7	Estimated from external data based on product description	57.07	8.15	PAS2050	-0.0276	This item was not included in last years report, but the emissions associated with this product have decreased from what they were during the last reporting period due to carbon reduction initiatives that took place. AVK UK's technical department re-designed a widely used component (ductile iron lug) to reduce the weight by 0.289kg (per lug). This product contains 4 ductile iron lugs, and therefo…	Product carbon efficiency changed	No	0.9876	0.0002	0.0123	0.011	0.0012	None
28921-1-2016	2016	No	See attached sheet	Canned tomato products	Pacific Coast Producers	USA	Food, Beverage & Tobacco	Food Products	Food & Beverage	907.19	As per company's submission to CDP	187.161	0.21	GHGP	(not reported by company)	N/a	N/a (no %change reported)	N/a (product with insufficient stage-level data)	N/a (product with insufficient stage-level data)	N/a (product with insufficient stage-level data)	N/a (product with insufficient stage-level data)	N/a (product with insufficient stage-level data)	N/a (product with insufficient stage-level data)	None
28933-1-2013	2013	Yes	Ecoworx Carpet Tile with Shaw's Eco Solution Q Nylon 6 face fiber	Ecoworx Carpet Tile with Shaw's Eco Solution Q Nylon 6 face fiber	Shaw Industries Group, Inc.	USA	Consumer Durables & Apparel	Textiles, Apparel & Luxury Goods	Home durables, textiles, & equipment	0.267907	Estimated from external data based on product description	14.6	54.5	ISO	0.38	Life Cycle Assessment for this product has been updated to 1) align methodology and scope/boundaries with US based Flooring Product Category Rules, and 2) to incorporate the latest available data tables for TRACI impact categories - including GHG.	Model and/or parameters changed (but not product)	No	0.8231	0.0952	0.0816	(included in up/downstream but not reported separately)	0.0136	None
28991-1-2016	2016	No	PET preforms for bottles	PET preforms are dedicated for production of plastic bottles which are formed by using the blow moulding technology. Producers of soft drinks, mineral water, juices, beer and edible oils use this safe and handly PET packing for their products.	Retal	Lithuania	Materials	Containers & Packaging	Packaging for consumer goods	0.03	As per company's submission to CDP	0.0108	0.36	GHGP	-0.015	Emission reduction activities.	Product carbon efficiency changed	N/a (product with insufficient stage-level data)	N/a (product with insufficient stage-level data)	N/a (product with insufficient stage-level data)	N/a (product with insufficient stage-level data)	N/a (product with insufficient stage-level data)	N/a (product with insufficient stage-level data)	None
2908-1-2013	2013	Yes	Page Printer SPEEDIA N3600	Field not included in 2013 data	Casio Computer Co., Ltd.	Japan	Consumer Durables & Apparel	Household Durables	Home durables, textiles, & equipment	45	Estimated from external data based on product description	2344	52.09	EcoLeaf	(not reported by company)	N/a	N/a (no %change reported)	No	0.1152	0.0055	0.8792	0.0047	0.0239	None
2908-1-2014	2014	Yes	SPEEDIA N3600	Page Printer	Casio Computer Co., Ltd.	Japan	Consumer Durables & Apparel	Household Durables	Home durables, textiles, & equipment	45	Estimated from external data based on product description	2344	52.09	ISO	(not reported by company)	N/a	N/a (no %change reported)	No	0.1152	0.0055	0.8792	0.0047	0.0239	None
3022-1-2016	2016	No	Lineal Alkyl Bencene (LAB)	(i) LAB produced in facilities of Brazil(ii) Production Emissions given per tonne of LAB	Compañía Española de Petróleos, S.A.U. CEPSA	Spain	Energy	Oil, Gas & Consumable Fuels	Chemicals	1000	As per company's submission to CDP	6109	6.11	Not reported	(not reported by company)	N/a	N/a (no %change reported)	N/a (product with insufficient stage-level data)	N/a (product with insufficient stage-level data)	N/a (product with insufficient stage-level data)	N/a (product with insufficient stage-level data)	N/a (product with insufficient stage-level data)	N/a (product with insufficient stage-level data)	Footprint %Change corrected to "not provided", consistent with company's explanation
3022-2-2016	2016	No	Lineal Alkyl Bencene (LAB)	(i) LAB produced in facilities of Puente Mayorga (ii) Production Emissions given per tonne of LAB	Compañía Española de Petróleos, S.A.U. CEPSA	Spain	Energy	Oil, Gas & Consumable Fuels	Chemicals	1000	As per company's submission to CDP	890	0.89	Not reported	(not reported by company)	N/a	N/a (no %change reported)	N/a (product with insufficient stage-level data)	N/a (product with insufficient stage-level data)	N/a (product with insufficient stage-level data)	N/a (product with insufficient stage-level data)	N/a (product with insufficient stage-level data)	N/a (product with insufficient stage-level data)	Footprint %Change corrected to "not provided", consistent with company's explanation
30495-1-2016	2016	No	E - Series Solar Panels (SPR-327NE-WHT-D AR modules)	SunPower® E-Series solar panels deliver efficient performance and long-lasting durability at a great value. Compared to other technologies, SunPower converts the greatest percentage of sunlight into electricity. This means that over the lifetime of your system, you’ll generate more electricity and save more money on your electricity bills. •More energy from less space: SunPower E-Series solar pan…	SunPower Corporation	USA	Capital Goods	Electrical Equipment	Comm. equipm. & capital goods	18.6	Estimated from external data based on product description	281	15.11	ISO	(not reported by company)	N/a	N/a (no %change reported)	N/a (product with insufficient stage-level data)	N/a (product with insufficient stage-level data)	N/a (product with insufficient stage-level data)	N/a (product with insufficient stage-level data)	N/a (product with insufficient stage-level data)	N/a (product with insufficient stage-level data)	None
31487-1-2013	2013	Yes	Droid Razr	Field not included in 2013 data	Motorola Mobility	USA	Consumer Durables & Apparel	Household Durables	Home durables, textiles, & equipment	0.127	Estimated from external data based on product description	29.96	235.91	Not reported	(not reported by company)	N/a	N/a (no %change reported)	No	0.0007	0.9235	0.0759	0.0338	(included in downstream but not reported separately)	None
3193-1-2013	2013	Yes	50” TFT-LCD TV module which consisted of the following main components: PCBA, converter, TFT-LCD panel, LED backlight	50” TFT-LCD TV module which consisted of the following main components: PCBA, converter, TFT-LCD panel, LED backlight	Innolux Corporation	Taiwan	Technology Hardware & Equipment	Electronic Equipment, Instruments & Components	Computer, IT & telecom	14.96	Estimated from external data based on product description	145	9.69	PAS2050	(not reported by company)	N/a	N/a (no %change reported)	No	0.6	0.4	0	(included in up/downstream but not reported separately)	(included in downstream but not reported separately)	None
32738-1-2013	2013	Yes	Can/Bottle vending machine -30Selections -Cooling / warming - R744 Heat Pump Refrigeration System - LED Lighting	Can/Bottle vending machine -30Selections -Cooling / warming - R744 Heat Pump Refrigeration System - LED Lighting	Sanden	Japan	Capital Goods	Machinery	Comm. equipm. & capital goods	342.462	Estimated from external data based on product description	3139.9	9.17	EcoLeaf	-0.006	Energy saving in operation	Product carbon efficiency changed	No	0.2842	0.0425	0.6733	0.0056	0.0912	None
32738-1-2014	2014	Yes	Vending Machine	Can/Bottle vending machine -30 Selections- Cooling / Warming - R744 Heat Pump Refrigeration System - LED Lighting	Sanden	Japan	Capital Goods	Machinery	Comm. equipm. & capital goods	342.462	Estimated from external data based on product description	2403.2	7.02	EcoLeaf	-0.23	35% reduction in "Usage (5 years)" due to Energy Saving in operation 26% reduction in "Disposal"	Product carbon efficiency changed	No	0.3598	0.0577	0.5825	0.0074	0.088	Corrected product from "Vevding" to "Vending"
32738-1-2015	2015	Yes	Vending Machine	Can/Bottle vending machine - 30 Selections, Cooling / Warming, Heat Pump Refrigeration System, LED Lighting	Sanden	Japan	Electrical Equipment and Machinery	Not used for 2015 reporting	Comm. equipm. & capital goods	342.462	Estimated from external data based on product description	2268.1	6.62	EcoLeaf	-0.06	30% reduction in "Usage" due to energy saving in operation.	Product carbon efficiency changed	No	0.4263	0.0667	0.507	0.008	0.1027	Corrected product from "Vevding" to "Vending"
32838-1-2015	2015	No	Sodium sulphate	sodium sulphate	Crimidesa	Spain	Chemicals	Not used for 2015 reporting	Chemicals	1000	As per company's submission to CDP	180	0.18	GHGP	(not reported by company)	N/a	N/a (no %change reported)	N/a (product with insufficient stage-level data)	N/a (product with insufficient stage-level data)	N/a (product with insufficient stage-level data)	N/a (product with insufficient stage-level data)	N/a (product with insufficient stage-level data)	N/a (product with insufficient stage-level data)	Total CO2 converted from ton to kg (unit was specified by company)
32838-1-2016	2016	No	sodium sulphate	sodium sulphate	Crimidesa	Spain	Materials	Chemicals	Chemicals	1000	As per company's submission to CDP	140	0.14	GHGP	0.011	Less production	Product carbon efficiency changed	N/a (product with insufficient stage-level data)	N/a (product with insufficient stage-level data)	N/a (product with insufficient stage-level data)	N/a (product with insufficient stage-level data)	N/a (product with insufficient stage-level data)	N/a (product with insufficient stage-level data)	Total CO2 converted from ton to kg (unit was specified by company)
3329-2-2013	2013	Yes	IP Phone	Field not included in 2013 data	Cisco Systems, Inc.	USA	Technology Hardware & Equipment	Communications Equipment	Computer, IT & telecom	3.5	Estimated from external data based on product description	278	79.43	ISO	(not reported by company)	N/a	N/a (no %change reported)	Yes	0.1939	0.074	0.7321	0.0014	(included in downstream but not reported separately)	None
3329-3-2013	2013	Yes	Small Rack Mount Switch	Field not included in 2013 data	Cisco Systems, Inc.	USA	Technology Hardware & Equipment	Communications Equipment	Computer, IT & telecom	2	Estimated from external data based on product description	1473	736.5	ISO	(not reported by company)	N/a	N/a (no %change reported)	Yes	0.055	0.021	0.924	0.0319	(included in downstream but not reported separately)	None
33496-2-2014	2014	Yes	Walmart Brand Products	Walmart Brand Product Emissions (Reported in kg/1000 units) Honey Oatmeal Bread, 24oz Yeasty Rolls, 17oz Soft Wheat Roll, 17oz English Muffin Toasting Bread, 20oz 9-Grain Bread, 22oz	Perfection Bakeries Inc.	USA	Food & Staples Retailing	Food & Staples Retailing	Food & Beverage	454	Estimated from external data based on product description	164	0.36	Not reported	(not reported by company)	N/a	N/a (no %change reported)	Yes	0.5274	0.2775	0.1951	0.1951	(included in downstream but not reported separately)	None
33496-2-2015	2015	Yes	Walmart Brand Products	Walmart Brand Product Emissions (Reported in kg/1000 units) 12-Grain Bread, Natural Wheat Bread, Honey Oatmeal Bread, Yeasty Rolls, and Soft Wheat Rolls	Perfection Bakeries Inc.	USA	Food & Staples Retailing	Not used for 2015 reporting	Food & Beverage	454	Estimated from external data based on product description	179	0.39	Not reported	0.0906	We produced 9.86% more Walmart-brand products by weight. Since my estimations are based on weight, more Walmart-brand pounds produced will result in an increase in emissions/unit. In addition, and to a lesser extent, my accounting error in 2013 resulted in me under-reporting emissions for 2013. This also had the effect of my emissions relative to 2013 being a little higher. I also had more emissi…	Model/parameters AND product carbon efficiency changed	Yes	0.4822	0.2537	0.264	0.264	(included in downstream but not reported separately)	None
33496-2-2016	2016	No	Walmart Brand Products	Walmart Brand Product Emissions (Reported in kg CO2e/lb units) 12-Grain Bread, Honey Oatmeal Bread, Yeasty Dinner Rolls, Seeded Rye Bread, Pumpernickel Bread	Perfection Bakeries Inc.	USA	Food, Beverage & Tobacco	Beverages	Food & Beverage	0.454	As per company's submission to CDP	0.141	0.31	Not reported	-0.0207	We manufactured the same products for Walmart in FY15, so I would expect the emissions to be similar. Our production lbs of Walmart brand products increased 49.3% over FY15, but our emissions per unit stayed relatively constant (-2.07%). Due to mymanufacturing process it is difficult to obtain exact emission numbers for specific Walmart brand products. Thus, I calculate an emissions factor based …	Product carbon efficiency changed	N/a (product with insufficient stage-level data)	N/a (product with insufficient stage-level data)	N/a (product with insufficient stage-level data)	N/a (product with insufficient stage-level data)	N/a (product with insufficient stage-level data)	N/a (product with insufficient stage-level data)	None
3435-1-2016	2016	Yes	GMP (5'-Guanylate)	Flavor enhancer	CJ Cheiljedang	South Korea	Food, Beverage & Tobacco	Beverages	Food & Beverage	1000	As per company's submission to CDP	24839	24.84	GHGP	-0.0309	We optimize our production process to maximize productivity and maximize facility utilization efficiency (air compressors / coolers, etc.).? Note : Revision of 2016 SKU unit notation - Before Change : kg - After Change : Ton	Product carbon efficiency changed	No	0.3413	0.6543	0.0043	0.0041	(included in downstream but not reported separately)	Converted stage CO2e figures in SM32b from ton to kg (consistent with product level submission)
3435-2-2016	2016	Yes	I&G (5'-Ribonucleotide)	Flavor enhancer	CJ Cheiljedang	South Korea	Food, Beverage & Tobacco	Beverages	Food & Beverage	1000	As per company's submission to CDP	21126	21.13	GHGP	-0.0138	We optimize our production process to maximize productivity and maximize facility utilization efficiency (air compressors / coolers, etc.).? Note : Revision of 2016 SKU unit notation - Before Change : kg - After Change : Ton	Product carbon efficiency changed	No	0.2359	0.7593	0.0049	0.0045	(included in downstream but not reported separately)	Converted stage CO2e figures in SM32b from ton to kg (consistent with product level submission)
3435-3-2016	2016	Yes	IMP (5'-Inosinate)	Flavor enhancer	CJ Cheiljedang	South Korea	Food, Beverage & Tobacco	Beverages	Food & Beverage	1000	As per company's submission to CDP	18042	18.04	GHGP	-0.0078	We optimize our production process to maximize productivity and maximize facility utilization efficiency (air compressors / coolers, etc.).? Note : Revision of 2016 SKU unit notation - Before Change : kg - After Change : Ton	Product carbon efficiency changed	No	0.1672	0.8307	0.0021	0.0019	(included in downstream but not reported separately)	Converted stage CO2e figures in SM32b from ton to kg (consistent with product level submission)
3435-4-2016	2016	Yes	L-Arginine	Food grade amino acid	CJ Cheiljedang	South Korea	Food, Beverage & Tobacco	Beverages	Food & Beverage	1000	As per company's submission to CDP	26836	26.84	GHGP	-0.0419	We optimize our production process to maximize productivity and maximize facility utilization efficiency (air compressors / coolers, etc.).	Product carbon efficiency changed	No	0.2989	0.6984	0.0026	0.0025	(included in downstream but not reported separately)	Converted stage CO2e figures in SM32b from ton to kg (consistent with product level submission)
3435-5-2016	2016	Yes	MSG (Monosodium Glutamate)	Flavor enhancer	CJ Cheiljedang	South Korea	Food, Beverage & Tobacco	Beverages	Food & Beverage	1000	As per company's submission to CDP	3859	3.86	GHGP	-0.0007	We optimize our production process to maximize productivity and maximize facility utilization efficiency (air compressors / coolers, etc.).? Note : Revision of 2016 SKU unit notation - Before Change : kg - After Change : Ton	Product carbon efficiency changed	No	0.2273	0.7608	0.0119	0.0111	(included in downstream but not reported separately)	Converted stage CO2e figures in SM32b from ton to kg (consistent with product level submission)
3435-6-2016	2016	No	SUGAR	Food Ingredients	CJ Cheiljedang	South Korea	Food, Beverage & Tobacco	Beverages	Food & Beverage	1000	As per company's submission to CDP	114.8	0.11	GHGP	(not reported by company)	N/a	N/a (no previous data available)	N/a (product with insufficient stage-level data)	N/a (product with insufficient stage-level data)	N/a (product with insufficient stage-level data)	N/a (product with insufficient stage-level data)	N/a (product with insufficient stage-level data)	N/a (product with insufficient stage-level data)	None
34386-1-2016	2016	Yes	Nicotine	Nicotine (i) 1 kg of nicotine (ii) requires further processing and transformation by third party.	CONTRAF-NICOTEX-TOBACCO GmbH	Germany	Food, Beverage & Tobacco	Tobacco	Food & Beverage	1	As per company's submission to CDP	16.884	16.88	GHGP	0.07	(i) reduced output (ii) higher electricity consuption	Product carbon efficiency changed	Yes	0.2357	0.124	0.6403	0.6403	(included in downstream but not reported separately)	None
3448-1-2013	2013	No	Organic pigments. PCF value for organic pigments, cradle to gate	Organic pigments. PCF value for organic pigments, cradle to gate	Clariant AG	Switzerland	Materials	Chemicals	Chemicals	1	Estimated from external data based on product description	26	26	Not reported	0.5	N/a	No specific reason reported	N/a (product with insufficient stage-level data)	N/a (product with insufficient stage-level data)	N/a (product with insufficient stage-level data)	N/a (product with insufficient stage-level data)	N/a (product with insufficient stage-level data)	N/a (product with insufficient stage-level data)	None
3448-2-2013	2013	No	PCF value for metal and effect pigments, cradle to gate	PCF value for metal and effect pigments, cradle to gate	Clariant AG	Switzerland	Materials	Chemicals	Chemicals	1	Estimated from external data based on product description	26	26	Not reported	(not reported by company)	N/a	N/a (no %change reported)	N/a (product with insufficient stage-level data)	N/a (product with insufficient stage-level data)	N/a (product with insufficient stage-level data)	N/a (product with insufficient stage-level data)	N/a (product with insufficient stage-level data)	N/a (product with insufficient stage-level data)	None
3448-3-2014	2014	No	Organic Pigments	Product Carbon Footprint for organic pigments, cradle to gate calculation.	Clariant AG	Switzerland	Materials	Chemicals	Chemicals	1	Estimated from external data based on product description	26	26	Not reported	(not reported by company)	N/a	N/a (no %change reported)	N/a (product with insufficient stage-level data)	N/a (product with insufficient stage-level data)	N/a (product with insufficient stage-level data)	N/a (product with insufficient stage-level data)	N/a (product with insufficient stage-level data)	N/a (product with insufficient stage-level data)	None
3448-3-2016	2016	No	Organic Pigments	Product carbon footprint for organic pigments, cradle to gate calculation	Clariant AG	Switzerland	Materials	Chemicals	Chemicals	1	As per company's submission to CDP	26	26	Not reported	(not reported by company)	N/a	N/a (no %change reported)	N/a (product with insufficient stage-level data)	N/a (product with insufficient stage-level data)	N/a (product with insufficient stage-level data)	N/a (product with insufficient stage-level data)	N/a (product with insufficient stage-level data)	N/a (product with insufficient stage-level data)	None
3448-4-2016	2016	No	De-icing fluids	De-icing on-site recycling at airport	Clariant AG	Switzerland	Materials	Chemicals	Chemicals	1	As per company's submission to CDP	1.85	1.85	ISO	(not reported by company)	N/a	N/a (no %change reported)	N/a (product with insufficient stage-level data)	N/a (product with insufficient stage-level data)	N/a (product with insufficient stage-level data)	N/a (product with insufficient stage-level data)	N/a (product with insufficient stage-level data)	N/a (product with insufficient stage-level data)	None
3448-5-2016	2016	No	Exolit ammonium polyphosphate	Non-halogenated flame retardants	Clariant AG	Switzerland	Materials	Chemicals	Chemicals	1	As per company's submission to CDP	5	5	ISO	(not reported by company)	N/a	N/a (no %change reported)	N/a (product with insufficient stage-level data)	N/a (product with insufficient stage-level data)	N/a (product with insufficient stage-level data)	N/a (product with insufficient stage-level data)	N/a (product with insufficient stage-level data)	N/a (product with insufficient stage-level data)	None
3448-6-2016	2016	No	Exolit OP phosphinates	Non-halogenated flame retardants	Clariant AG	Switzerland	Materials	Chemicals	Chemicals	1	As per company's submission to CDP	9	9	ISO	(not reported by company)	N/a	N/a (no %change reported)	N/a (product with insufficient stage-level data)	N/a (product with insufficient stage-level data)	N/a (product with insufficient stage-level data)	N/a (product with insufficient stage-level data)	N/a (product with insufficient stage-level data)	N/a (product with insufficient stage-level data)	None
3448-7-2016	2016	Yes	Sunliquid	Advanced biofuels: ethanol from wheat straw	Clariant AG	Switzerland	Materials	Chemicals	Chemicals	0.0333333	As per company's submission to CDP	0.004	0.12	JEC/BIOGRACE	(not reported by company)	N/a	N/a (no %change reported)	Yes	0.2236	0.1185	0.6579	0.6579	(included in downstream but not reported separately)	None
35290-1-2013	2013	No	Verre Infini, perfumery glass made only with domestic glass from segregation. Middle bottle weighing 100g	Verre Infini, perfumery glass made only with domestic glass from segregation. Middle bottle weighing 100g	SGD Group	France	Household & Personal Products	Personal Products	Packaging for consumer goods	0.1	As per company's submission to CDP	0.124	1.24	Not reported	(not reported by company)	N/a	N/a (no %change reported)	N/a (product with insufficient stage-level data)	N/a (product with insufficient stage-level data)	N/a (product with insufficient stage-level data)	N/a (product with insufficient stage-level data)	N/a (product with insufficient stage-level data)	N/a (product with insufficient stage-level data)	None
35290-2-2013	2013	No	Perfumery specific glass. Middle bottle weighing 100g	Perfumery specific glass. Middle bottle weighing 100g	SGD Group	France	Household & Personal Products	Personal Products	Packaging for consumer goods	0.1	As per company's submission to CDP	0.162	1.62	Not reported	(not reported by company)	N/a	N/a (no %change reported)	N/a (product with insufficient stage-level data)	N/a (product with insufficient stage-level data)	N/a (product with insufficient stage-level data)	N/a (product with insufficient stage-level data)	N/a (product with insufficient stage-level data)	N/a (product with insufficient stage-level data)	None
35311-10-2016	2016	Yes	Interface Brazil Carpet	Square meter of Interface carpet tile sold in Brazil	Interface, Inc.	USA	Consumer Durables & Apparel	Textiles, Apparel & Luxury Goods	Home durables, textiles, & equipment	4.164	Estimated from external data based on product description	9.78	2.35	ISO	-0.1	N/a	No specific reason reported	Yes	0.5946	0.1497	0.2556	(included in up/downstream but not reported separately)	0.0276	Footprint %Change flipped from "+" to "-", consistent with company's explanation
35311-11-2016	2016	Yes	Interface Canada Carpet	Square meter of Interface carpet tile sold in Canada	Interface, Inc.	USA	Consumer Durables & Apparel	Textiles, Apparel & Luxury Goods	Home durables, textiles, & equipment	4.164	Estimated from external data based on product description	11.06	2.66	ISO	-0.05	N/a	No specific reason reported	Yes	0.5251	0.1322	0.3427	(included in up/downstream but not reported separately)	0.0244	Footprint %Change flipped from "+" to "-", consistent with company's explanation
35311-1-2013	2013	Yes	Interface United States carpet tile (The average square meter of carpet tile sold as Cool Carpet by our Interface business in the United States)	Interface United States carpet tile (The average square meter of carpet tile sold as Cool Carpet by our Interface business in the United States)	Interface, Inc.	USA	Consumer Durables & Apparel	Textiles, Apparel & Luxury Goods	Home durables, textiles, & equipment	4.164	Estimated from external data based on product description	13.39	3.22	ISO	-0.14	A product mix with lower average face weight and higher recycled content, combined with a change in calculation methodology for End of Life impacts, resulted in a decrease in emissions per unit.	Product carbon efficiency changed	Yes	0.5489	0.1382	0.3129	(included in up/downstream but not reported separately)	0.0194	None
35311-1-2014	2014	Yes	Interface US carpet	Square meter of Interface carpet tile manufactured in the United States	Interface, Inc.	USA	Consumer Durables & Apparel	Textiles, Apparel & Luxury Goods	Home durables, textiles, & equipment	4.164	Estimated from external data based on product description	12.59	3.02	ISO	-0.0597	Slightly higher yarn weight and higher energy use were offset by increased recycled yarn content and use of renewable electricity.	Product carbon efficiency changed	Yes	0.5463	0.1376	0.3161	(included in up/downstream but not reported separately)	0.0214	None
35311-12-2016	2016	Yes	Interface Global LVT	Square meter of Interface LVT sold globally	Interface, Inc.	USA	Consumer Durables & Apparel	Textiles, Apparel & Luxury Goods	Home durables, textiles, & equipment	4.164	Estimated from external data based on product description	17.1	4.11	ISO	(not reported by company)	N/a	N/a (no previous data available)	Yes	0.5695	0.1434	0.2871	(included in up/downstream but not reported separately)	0.0281	None
35311-2-2013	2013	Yes	Interface EMEAI carpet tile (The average square meter of carpet tile sold as Cool Carpet by our Interface business in EMEAI)	Interface EMEAI carpet tile (The average square meter of carpet tile sold as Cool Carpet by our Interface business in EMEAI)	Interface, Inc.	USA	Consumer Durables & Apparel	Textiles, Apparel & Luxury Goods	Home durables, textiles, & equipment	4.164	Estimated from external data based on product description	10.1	2.43	ISO	-0.21	A product mix with lower average face weight and energy efficiencies from plant consolidation, combined with a change in calculation methodology for End of Life impacts, resulted in a decrease in emissions per unit.	Product carbon efficiency changed	Yes	0.526	0.1324	0.3416	(included in up/downstream but not reported separately)	0.1327	None
35311-2-2015	2015	Yes	Interface EMEA Carpet	Square meter of Interface carpet tile sold in Europe, the Middle East or Africa	Interface, Inc.	USA	Textiles, Apparel, Footwear and Luxury Goods	Not used for 2015 reporting	Home durables, textiles, & equipment	4.164	Estimated from external data based on product description	10.98	2.64	ISO	0.088	increase in raw material use	Product carbon efficiency changed	No	0.6648	0.02	0.3151	(included in up/downstream but not reported separately)	0.1275	None
35311-3-2013	2013	Yes	Interface Thailand carpet tile (The average square meter of carpet tile sold as Cool Carpet by our Interface business in Southeast Asia)	Interface Thailand carpet tile (The average square meter of carpet tile sold as Cool Carpet by our Interface business in Southeast Asia)	Interface, Inc.	USA	Consumer Durables & Apparel	Textiles, Apparel & Luxury Goods	Home durables, textiles, & equipment	4.164	Estimated from external data based on product description	14.99	3.6	ISO	-0.07	A product mix with higher average face weight, an increased use of Nylon 6, and increased energy use were offset by a change in calculation methodology for End of Life impacts resulting in a net decrease in emissions per unit.	Model/parameters AND product carbon efficiency changed	Yes	0.6006	0.1512	0.2482	(included in up/downstream but not reported separately)	0.0213	None
35311-3-2014	2014	Yes	Interface Asia carpet	Square meter of Interface carpet tile manufactured in Thailand	Interface, Inc.	USA	Consumer Durables & Apparel	Textiles, Apparel & Luxury Goods	Home durables, textiles, & equipment	4.164	Estimated from external data based on product description	14.09	3.38	ISO	-0.06	Slightly higher yarn weight was offset by significantly higher recycled yarn content.	Product carbon efficiency changed	Yes	0.5794	0.1459	0.2747	(included in up/downstream but not reported separately)	0.0206	None
35311-3-2016	2016	Yes	Interface Thailand Carpet	Square meter of Interface carpet tile sold in SE Asia, Japan, Korea or India	Interface, Inc.	USA	Consumer Durables & Apparel	Textiles, Apparel & Luxury Goods	Home durables, textiles, & equipment	4.164	Estimated from external data based on product description	11.3	2.71	ISO	-0.08	N/a	No specific reason reported	Yes	0.5733	0.1444	0.2823	(included in up/downstream but not reported separately)	0.0265	Footprint %Change flipped from "+" to "-", consistent with company's explanation
35311-4-2013	2013	Yes	Interface Australia carpet tile (The average square meter of carpet tile sold as Cool Carpet by our Interface business in Australia)	Interface Australia carpet tile (The average square meter of carpet tile sold as Cool Carpet by our Interface business in Australia)	Interface, Inc.	USA	Consumer Durables & Apparel	Textiles, Apparel & Luxury Goods	Home durables, textiles, & equipment	4.164	Estimated from external data based on product description	17.15	4.12	ISO	-0.06	A product mix with higher average face weight and changes in import mix resulting from a fire at our manufacturing facility were offset by a change in calculation methodology for End of Life impacts resulting in a net decrease in emissions per unit.	Model/parameters AND product carbon efficiency changed	Yes	0.5613	0.1413	0.2974	(included in up/downstream but not reported separately)	0.0169	None
35311-4-2015	2015	Yes	Interface Australia Carpet	Square meter of Interface carpet tile sold in Australia	Interface, Inc.	USA	Textiles, Apparel, Footwear and Luxury Goods	Not used for 2015 reporting	Home durables, textiles, & equipment	4.164	Estimated from external data based on product description	15.93	3.83	ISO	(not reported by company)	N/a	N/a (no %change reported)	No	0.5367	0.1538	0.3095	(included in up/downstream but not reported separately)	0.0207	Corrected "Methods" field to "ISO", as per company's other disclosures
35311-4-2016	2016	Yes	Interface Australia Carpet	Square meter of Interface carpet tile sold in Australia	Interface, Inc.	USA	Consumer Durables & Apparel	Textiles, Apparel & Luxury Goods	Home durables, textiles, & equipment	4.164	Estimated from external data based on product description	12.84	3.08	ISO	-0.14	N/a	No specific reason reported	Yes	0.5002	0.126	0.3738	(included in up/downstream but not reported separately)	0.0195	Footprint %Change flipped from "+" to "-", consistent with company's explanation
35311-5-2014	2014	Yes	Interface Europe carpet	Square meter of Interface carpet tile manufactured in Europe	Interface, Inc.	USA	Consumer Durables & Apparel	Textiles, Apparel & Luxury Goods	Home durables, textiles, & equipment	4.164	Estimated from external data based on product description	10.09	2.42	ISO	-0.001	N/a	No specific reason reported	Yes	0.5236	0.1318	0.3446	(included in up/downstream but not reported separately)	0.1366	None
35311-5-2016	2016	Yes	Interface Europe Carpet	Square meter of Interface carpet tile sold in Europe, Middle East or Africa	Interface, Inc.	USA	Consumer Durables & Apparel	Textiles, Apparel & Luxury Goods	Home durables, textiles, & equipment	4.164	Estimated from external data based on product description	10.41	2.5	ISO	0.02	Increase due to change in emission factor used	Model and/or parameters changed (but not product)	Yes	0.4842	0.1219	0.3939	(included in up/downstream but not reported separately)	0.1172	None
35311-6-2015	2015	Yes	Interface Asia Carpet	Square meter of Interface carpet tile sold in Asia (excluding China)	Interface, Inc.	USA	Textiles, Apparel, Footwear and Luxury Goods	Not used for 2015 reporting	Home durables, textiles, & equipment	4.164	Estimated from external data based on product description	13.63	3.27	ISO	-0.032	increased recycled yarn content	Product carbon efficiency changed	No	0.6508	0.0697	0.2795	(included in up/downstream but not reported separately)	0.022	None
35311-7-2015	2015	Yes	Interface Americas Carpet	Square meter of Interface carpet tile sold in the United States, Canada or Latin America	Interface, Inc.	USA	Textiles, Apparel, Footwear and Luxury Goods	Not used for 2015 reporting	Home durables, textiles, & equipment	4.164	Estimated from external data based on product description	12.89	3.1	ISO	0.024	slight increase in raw material use	Product carbon efficiency changed	No	0.6457	0.0465	0.3078	(included in up/downstream but not reported separately)	0.0233	None
35311-7-2016	2016	Yes	Interface Americas Carpet	Square meter of Interface carpet tile sold in the United States or Latin America, excluding Brazil	Interface, Inc.	USA	Consumer Durables & Apparel	Textiles, Apparel & Luxury Goods	Home durables, textiles, & equipment	4.164	Estimated from external data based on product description	11.27	2.71	ISO	-0.03	N/a	No specific reason reported	Yes	0.5314	0.1338	0.3348	(included in up/downstream but not reported separately)	0.024	Footprint %Change flipped from "+" to "-", consistent with company's explanation
35311-8-2015	2015	Yes	Interface China Carpet	Square meter of Interface carpet tile sold in China	Interface, Inc.	USA	Textiles, Apparel, Footwear and Luxury Goods	Not used for 2015 reporting	Home durables, textiles, & equipment	4.164	Estimated from external data based on product description	15.44	3.71	ISO	(not reported by company)	N/a	N/a (no %change reported)	No	0.6091	0.0777	0.3133	(included in up/downstream but not reported separately)	0.0181	Corrected "Methods" field to "ISO", as per company's other disclosures
35311-8-2016	2016	Yes	Interface China Carpet	Square meter of Interface carpet tile sold in China	Interface, Inc.	USA	Consumer Durables & Apparel	Textiles, Apparel & Luxury Goods	Home durables, textiles, & equipment	4.164	Estimated from external data based on product description	15.42	3.7	ISO	0.09	Increase due to change in disposal methodology used in modeling	Model and/or parameters changed (but not product)	Yes	0.4349	0.1095	0.4555	(included in up/downstream but not reported separately)	0.1486	None
35374-1-2013	2013	No	Ethanol. In addition to its use as fuel (in vehicles), ethanol is an input to the food, chemical and cosmetic industries.	Ethanol. In addition to its use as fuel (in vehicles), ethanol is an input to the food, chemical and cosmetic industries.	Raizen	Brazil	Energy	Oil, Gas & Consumable Fuels	Chemicals	789	As per company's submission to CDP	750	0.95	GHGP	(not reported by company)	N/a	N/a (no previous data available)	N/a (product with insufficient stage-level data)	N/a (product with insufficient stage-level data)	N/a (product with insufficient stage-level data)	N/a (product with insufficient stage-level data)	N/a (product with insufficient stage-level data)	N/a (product with insufficient stage-level data)	None
3565-10-2013	2013	Yes	Coke Zero 330 ml glass bottle	Field not included in 2013 data	Coca-Cola Enterprises, Inc.	USA	Food, Beverage & Tobacco	Beverages	Food & Beverage	0.541	Estimated from external data based on product description	0.34	0.63	GHGP	(not reported by company)	N/a	N/a (no %change reported)	No	0.7395	0.0342	0.2263	0.043	(included in downstream but not reported separately)	None
3565-11-2013	2013	Yes	Coke Zero 500ml PET	Field not included in 2013 data	Coca-Cola Enterprises, Inc.	USA	Food, Beverage & Tobacco	Beverages	Food & Beverage	0.541	Estimated from external data based on product description	0.22	0.41	GHGP	(not reported by company)	N/a	N/a (no %change reported)	No	0.5209	0.1232	0.3559	0.0718	(included in downstream but not reported separately)	None
3565-1-2013	2013	Yes	Coca-Cola 300ml can	Field not included in 2013 data	Coca-Cola Enterprises, Inc.	USA	Food, Beverage & Tobacco	Beverages	Food & Beverage	0.3	As per company's submission to CDP	0.17	0.57	GHGP	(not reported by company)	N/a	N/a (no %change reported)	No	0.6976	0.07	0.2324	0.0571	(included in downstream but not reported separately)	None
3565-12-2013	2013	Yes	Coke Zero- 2 litre plastic bottle	Field not included in 2013 data	Coca-Cola Enterprises, Inc.	USA	Food, Beverage & Tobacco	Beverages	Food & Beverage	2	As per company's submission to CDP	0.4	0.2	GHGP	(not reported by company)	N/a	N/a (no %change reported)	No	0.502	0.216	0.282	0.138	(included in downstream but not reported separately)	None
3565-13-2013	2013	Yes	Oasis Summer Fruits - 375ml glass	Field not included in 2013 data	Coca-Cola Enterprises, Inc.	USA	Food, Beverage & Tobacco	Beverages	Food & Beverage	0.614	Estimated from external data based on product description	0.35	0.57	GHGP	(not reported by company)	N/a	N/a (no %change reported)	No	0.7251	0.0429	0.2321	0.048	(included in downstream but not reported separately)	None
3565-14-2013	2013	Yes	Oasis Summer Fruits - 500ml plastic bottle	Field not included in 2013 data	Coca-Cola Enterprises, Inc.	USA	Food, Beverage & Tobacco	Beverages	Food & Beverage	0.541	Estimated from external data based on product description	0.24	0.44	GHGP	(not reported by company)	N/a	N/a (no %change reported)	No	0.5684	0.1143	0.3173	0.0651	(included in downstream but not reported separately)	None
3565-2-2013	2013	No	Coca-Cola 300ml glass bottle	Field not included in 2013 data	Coca-Cola Enterprises, Inc.	USA	Food, Beverage & Tobacco	Beverages	Food & Beverage	0.492	Estimated from external data based on product description	0.36	0.73	GHGP	(not reported by company)	N/a	N/a (no %change reported)	N/a (product with insufficient stage-level data)	N/a (product with insufficient stage-level data)	N/a (product with insufficient stage-level data)	N/a (product with insufficient stage-level data)	N/a (product with insufficient stage-level data)	N/a (product with insufficient stage-level data)	None
3565-3-2013	2013	Yes	Coca-Cola 500ml plastic bottle	Field not included in 2013 data	Coca-Cola Enterprises, Inc.	USA	Food, Beverage & Tobacco	Beverages	Food & Beverage	0.541	Estimated from external data based on product description	0.24	0.44	GHGP	(not reported by company)	N/a	N/a (no %change reported)	No	0.5718	0.1102	0.318	0.0659	(included in downstream but not reported separately)	None
3565-4-2013	2013	Yes	Coca-Cola 2 litre plastic bottle	Field not included in 2013 data	Coca-Cola Enterprises, Inc.	USA	Food, Beverage & Tobacco	Beverages	Food & Beverage	2	As per company's submission to CDP	0.5	0.25	GHGP	(not reported by company)	N/a	N/a (no %change reported)	No	0.6096	0.1712	0.2192	0.1101	(included in downstream but not reported separately)	None
3565-5-2013	2013	Yes	Diet Coke 300ml can	Field not included in 2013 data	Coca-Cola Enterprises, Inc.	USA	Food, Beverage & Tobacco	Beverages	Food & Beverage	0.3	As per company's submission to CDP	0.15	0.5	GHGP	(not reported by company)	N/a	N/a (no %change reported)	No	0.6644	0.0766	0.259	0.0619	(included in downstream but not reported separately)	None
[truncated: 269 more rows]

## Sheet: Stage Level Data
*PCF-ID	Description of LCA stage	Scope-characterization of LCA stage	*Assigned value chain portion	Emissions at stage (kg CO2e)	*Emissions at this stage are exclusively transport	*Emissions at this stage are exclusively EndOfLife
10056-1-2014	Other: Raw Material	Scope 3	Upstream	1.15	No	No
[truncated: 1,763 more rows]

## Sheet: Glossary
Fieldname	Table	Source	Type	Short explanation (see manuscript for further detail)
[truncated: 31 more rows]

[truncated: 1 more sheets: Product Viewer]
